# Supplementary material for: Selective hydroboration of electron-rich isocyanates by an NHC-copper(i) alkoxide
Source: Royal Society of Chemistry journal article supplement (doi:10.1039/d2cc04742j), 2022-12-26
Supplement: d2cc04742j1.pdf [file d2cc04742j1.pdf]

Supplementary Information for

## **Selective Hydroboration of Electron-Rich Isocyanates by an NHC-Copper(I) Alkoxide**

Laura E. English, Thomas M. Horsley Downie, Catherine L. Lyall, Mary F. Mahon, Claire L. McMullin,  
Samuel E. Neale, Carla M. Saunders, David J. Liptrot\*

|                                                               |           |
|---------------------------------------------------------------|-----------|
| <b>General Considerations and Starting Materials</b>          | <b>2</b>  |
| <b>General procedure for Hydroboration of Heterocumulenes</b> | <b>2</b>  |
| <b>Synthesis of (6-Dipp)CuN(iPr)C(O)H</b>                     | <b>2</b>  |
| <b>Spectroscopic Data for Hydroborated Heterocumulenes</b>    | <b>3</b>  |
| <b>Xray Crystallography</b>                                   | <b>6</b>  |
| <b>Computational Details</b>                                  | <b>7</b>  |
| <b>NMR Spectra</b>                                            | <b>27</b> |
| <b>References</b>                                             | <b>51</b> |

## General Considerations and Starting Materials

All reactions involving air- and moisture-sensitive compounds were carried out under argon atmosphere using standard Schlenk line and glovebox techniques. NMR experiments using air-sensitive compounds were conducted in J. Young's tap NMR tubes prepared and sealed in a glovebox under argon. Hexane was purified using an MBraun Solvent Purification System and stored over 4 Å molecular sieves. C<sub>6</sub>D<sub>6</sub> was dried over a potassium mirror prior to vacuum transfer into a sealed ampoule and storage in the glove box under argon, CDCl<sub>3</sub> was dried over CaH<sub>2</sub> prior to vacuum transfer into a sealed ampoule and stored over 4 Å molecular sieves. All NMR data were acquired at 298 K on an Agilent ProPulse or Bruker Avance 500 instruments for <sup>1</sup>H (500 MHz), <sup>13</sup>C (126 MHz), <sup>19</sup>F (470 MHz) and <sup>11</sup>B (160 MHz). <sup>1</sup>H and <sup>13</sup>C NMR spectra were referenced using residual solvent resonances. Data was processed using MestReNova software. Mass spectrometry was performed using a Bruker MicrOTOF Electrospray Time-Of-Flight Mass Spectrometer coupled to an Agilent High Performance Liquid Chromatography unit. Starting materials were purchased from standard suppliers and used without further purification unless otherwise stated. PinBH and heterocumulenes were distilled prior use. (IPr)CuOtBu and (6-Dipp)CuOtBu were prepared according to literature procedures.<sup>1,2</sup>

## General procedure for Hydroboration of Heterocumulenes

1,3,5-trimethoxybenzene (3.3 mg, 20 μmol) was dissolved in 500 μL C<sub>6</sub>D<sub>6</sub>. Heterocumulene (0.13 mmol) was added, and the solution was transferred to a J. Young's NMR tube. <sup>1</sup>H NMR spectrum, with relaxation delay of 60 s, was collected to determine accurate ratio of heterocumulene to internal standard. (IPr)CuOtBu (0.02 eq.) was dissolved in 100 μL C<sub>6</sub>D<sub>6</sub> and added to the NMR tube, followed by PinBH (1.3 eq.) Reactions were monitored by <sup>1</sup>H and <sup>11</sup>B NMR spectroscopy.

## Blank Reaction Between iPrNCO and Pinacolborane

1,3,5-trimethoxybenzene (4.3 mg, 26 μmol) was dissolved in 500 μL C<sub>6</sub>D<sub>6</sub>. iPrNCO (0.13 mmol) was added, and the solution was transferred to a J. Young's NMR tube. <sup>1</sup>H NMR spectrum, with relaxation delay of 60 s, was collected to determine accurate ratio of isocyanate to internal standard. PinBH (1.3 eq.) was then added to the NMR tube. Reaction was monitored by <sup>1</sup>H and <sup>11</sup>B NMR spectroscopy after timepoints of 30 minutes at room temperature and 16 hours at 80 °C.

## Synthesis of (6-Dipp)CuN(iPr)C(O)H

PinBH (17 μL, 0.12 mmol) was added to a solution of (6-Dipp)CuOtBu (65 mg, 0.12 mmol) in C<sub>6</sub>D<sub>6</sub> (0.5 mL) to give an orange solution. To this solution was added iPrNCO (12 μL, 0.12 mmol). Crystalline material precipitated from the reaction mixture, suitable for XRD. The supernatant solution was decanted, and the product was washed with hexane and dried *in vacuo* to give (6-Dipp)CuN(iPr)C(O)H as a colourless crystalline solid. Yield 30 mg (45 %). <sup>1</sup>H NMR (500 MHz, C<sub>6</sub>D<sub>6</sub>) δ 7.27 (s, 1H, C(O)H), 7.15 – 7.11 (m, 2H, Ar-H), 7.01 (d, *J* = 7.7 Hz, 4H, Ar-H), 4.57 (dh, *J* = 6.5, 1.2 Hz, 1H, NCH), 2.94 (hept, *J* = 6.9 Hz, 4H, CH(CH<sub>3</sub>)<sub>2</sub>), 2.73 (t, *J* = 5.8 Hz 4H, NCH<sub>2</sub>), 1.50 (p, *J* = 5.8 Hz, 2H, NCH<sub>2</sub>CH<sub>2</sub>), 1.40 (d, *J* = 6.9 Hz, 12H, CH(CH<sub>3</sub>)<sub>2</sub>), 1.14 (d, *J* = 6.9 Hz, 12H, CH(CH<sub>3</sub>)<sub>2</sub>), 0.70 (d, *J* = 6.4 Hz, 6H, NCH(CH<sub>3</sub>)<sub>2</sub>). <sup>13</sup>C{<sup>1</sup>H} NMR (126 MHz, C<sub>6</sub>D<sub>6</sub>) δ 202.3 (CuC), 166.1 (CO), 145.7 (Ar-C), 142.0 (Ar-C), 129.7 (Ar-C), 125.0 (Ar-C), 46.0 (NCH<sub>2</sub>), 42.3 (NCH(CH<sub>3</sub>)<sub>2</sub>), 28.9 (CH(CH<sub>3</sub>)<sub>2</sub>), 25.8 (NCH(CH<sub>3</sub>)<sub>2</sub>), 25.0 (CH(CH<sub>3</sub>)<sub>2</sub>), 24.8 (CH(CH<sub>3</sub>)<sub>2</sub>), 20.1 (NCH<sub>2</sub>CH<sub>2</sub>). MS (ESI) for [(6-Dipp)CuN(iPr)C(O)H]- Expected: 553.3093, found: 553.3097 (err [ppm] = 0.59).

## Reaction of (6-Dipp)CuN(iPr)C(O)H with Pinacolborane

(6-Dipp)CuN(iPr)C(O)H (20 mg, 36  $\mu$ mol) was suspended in 500  $\mu$ L C<sub>6</sub>D<sub>6</sub> and transferred to a J. Young's NMR tube. Pinacolatoborane (4.6 mg, 5.2  $\mu$ L, 36  $\mu$ mol) was added resulting in a colour change from colourless to orange and the dissolution of any remaining insoluble (6-Dipp)CuN(iPr)C(O)H. The reaction was monitored by <sup>1</sup>H and <sup>11</sup>B NMR spectroscopy.

## Spectroscopic Data for Boraformamides

### PinBN(iPr)C(O)H, 1a

<sup>1</sup>H NMR (500 MHz, C<sub>6</sub>D<sub>6</sub>)  $\delta$  9.03 (s, 1H), 4.68 (hept,  $J$  = 6.8 Hz, 1H), 1.25 (d,  $J$  = 6.9 Hz, 6H), 0.94 (s, 12H). <sup>13</sup>C NMR (126 MHz, C<sub>6</sub>D<sub>6</sub>)  $\delta$  165.2, 83.5, 42.1, 24.3, 21.7. <sup>11</sup>B NMR (160 MHz, C<sub>6</sub>D<sub>6</sub>)  $\delta$  25.8. MS (ESI) for [HN(iPr)C(O)H+H]<sup>+</sup>; Expected: 88.0757, found: 88.0756 (err [ppm] = -0.99). NMR data matches literature values.<sup>3</sup>

### PinBN(Cy)C(O)H, 1b

<sup>1</sup>H NMR (500 MHz, C<sub>6</sub>D<sub>6</sub>)  $\delta$  9.10 (s, 1H), 4.39 – 4.31 (m, 1H), 2.04 – 1.97 (m, 2H), 1.69 – 1.62 (m, 4H), 1.53 – 1.42 (m, 1H), 1.23 – 1.15 (m, 2H), 1.11 – 1.06 (m, 1H), 0.96 (s, 12H). <sup>13</sup>C NMR (126 MHz, C<sub>6</sub>D<sub>6</sub>)  $\delta$  165.4, 83.5, 50.2, 32.0, 26.6, 25.8, 24.4. <sup>11</sup>B NMR (160 MHz, C<sub>6</sub>D<sub>6</sub>)  $\delta$  25.8. MS (ESI) for [HN(Cy)C(O)H+H]<sup>+</sup>; Expected: 128.1069, found: 128.1071 (err [ppm] = 1.33). NMR data matches literature values.<sup>3</sup>

### PinBN(Ph)C(O)H, 1d

<sup>1</sup>H NMR (500 MHz, C<sub>6</sub>D<sub>6</sub>)  $\delta$  9.17 (s, 1H, NC(O)H), 7.22 – 7.21 (m, 2H, Ar-CH), 7.13 – 7.10 (m, 2H, Ar-CH), 6.99 – 6.95 (m, 1H, Ar-CH), 0.92 (s, 12H, B(OC(CH<sub>3</sub>)<sub>2</sub>)<sub>2</sub>). <sup>13</sup>C NMR (126 MHz, C<sub>6</sub>D<sub>6</sub>)  $\delta$  164.3 (NC(O)H), 137.4 (Ar-C), 128.8 (Ar-C), 128.0 (Ar-C), 126.9 (Ar-C), 84.3 (B(OC(CH<sub>3</sub>)<sub>2</sub>)<sub>2</sub>), 24.4 (B(OC(CH<sub>3</sub>)<sub>2</sub>)<sub>2</sub>). <sup>11</sup>B NMR (160 MHz, C<sub>6</sub>D<sub>6</sub>)  $\delta$  25.7. MS (ESI) for [HN(Ph)C(O)H+H]<sup>+</sup>; Expected: 122.0601, found: 122.0600 (err [ppm] = -0.40).

### PinBN(4-Me-C<sub>6</sub>H<sub>4</sub>)C(O)H, 1e

<sup>1</sup>H NMR (500 MHz, C<sub>6</sub>D<sub>6</sub>)  $\delta$  9.19 (s, 1H), 7.13 (d,  $J$  = 7.9 Hz, 2H), 6.94 (d,  $J$  = 7.9 Hz, 2H), 2.02 (s, 3H), 0.94 (s, 12H). <sup>13</sup>C NMR (126 MHz, C<sub>6</sub>D<sub>6</sub>)  $\delta$  164.4, 136.4, 134.8, 129.5, 128.4, 84.2, 24.4, 20.9. <sup>11</sup>B NMR (160 MHz, C<sub>6</sub>D<sub>6</sub>)  $\delta$  25.7. MS (ESI) for [HN(4-Me-C<sub>6</sub>H<sub>4</sub>)C(O)H+H]<sup>+</sup>; Expected: 136.0753, found: 136.0758 (err [ppm] = 1.15). NMR data matches literature values.<sup>4</sup>

### PinBN(Dipp)C(O)H, 1f

<sup>1</sup>H NMR (500 MHz, C<sub>6</sub>D<sub>6</sub>)  $\delta$  9.24 (s, 1H), 7.18-7.16 (m, 1H), 7.11-7.10 (m, 2H), 3.04-3.01 (m, 2H), 1.23-1.22 (m, 12H), 0.95 (s, 12H). <sup>13</sup>C NMR (126 MHz, C<sub>6</sub>D<sub>6</sub>)  $\delta$  164.6, 145.9, 132.6, 128.6, 123.8, 84.2, 29.2, 24.4, 24.2, 24.1. <sup>11</sup>B NMR (160 MHz, C<sub>6</sub>D<sub>6</sub>)  $\delta$  25.8. MS (ESI) for [HN(Dipp)C(O)H+Na]<sup>+</sup>; Expected: 228.1358, found: 228.1360 (err [ppm] = 1.13). NMR data matches literature values.<sup>4</sup>

### PinBN(4-MeO-C<sub>6</sub>H<sub>4</sub>)C(O)H, 1g

<sup>1</sup>H NMR (500 MHz, C<sub>6</sub>D<sub>6</sub>)  $\delta$  9.19 (s, 1H), 7.13 (d,  $J$  = 7.5 Hz, 2H), 6.72 (d,  $J$  = 7.5 Hz, 2H), 3.23 (s, 3H), 0.95 (s, 12H). <sup>13</sup>C NMR (126 MHz, C<sub>6</sub>D<sub>6</sub>)  $\delta$  164.6, 158.8, 130.1, 129.0, 114.3, 84.2, 54.9, 24.4. <sup>11</sup>B NMR (160 MHz, C<sub>6</sub>D<sub>6</sub>)  $\delta$  25.8. MS (ESI) for [HN(4-OMe-C<sub>6</sub>H<sub>4</sub>)C(O)H+Na]<sup>+</sup>; Expected: 174.0524, found: 174.0526 (err [ppm] = 1.27). NMR data matches literature values.<sup>4</sup>

PinBN(4-NC-C<sub>6</sub>H<sub>4</sub>)C(O)H, 1h

<sup>1</sup>H NMR (500 MHz, C<sub>6</sub>D<sub>6</sub>) δ 8.96 (s, 1H), 7.01-6.99 (m, 2H), 6.92-6.90 (m, 2H), 0.93 (s, 12H). <sup>11</sup>B NMR (160 MHz, C<sub>6</sub>D<sub>6</sub>) δ 25.1, 21.7. MS (ESI) for [HN(4-NC-C<sub>6</sub>H<sub>4</sub>)C(O)H-H]<sup>-</sup>; Expected: 145.0407, found: 145.0412 (err [ppm] = 3.37). Due to mixture of products <sup>13</sup>C NMR data was not collected and specific signals in the <sup>11</sup>B NMR spectrum were not assigned. NMR data matches literature values.<sup>4</sup>

Single crystals suitable for XRD formed directly from the reaction mixture.

PinBN(4-NC-C<sub>6</sub>H<sub>4</sub>)CH<sub>3</sub>, 1h'

<sup>1</sup>H NMR (500 MHz, C<sub>6</sub>D<sub>6</sub>) δ 7.16-7.18 (m, 4H), 2.73 (s, 3H) 0.86 (s, 12H). <sup>11</sup>B NMR (160 MHz, C<sub>6</sub>D<sub>6</sub>) δ 25.1, 21.7. MS (ESI) for [HN(4-NC-C<sub>6</sub>H<sub>4</sub>)CH<sub>3</sub>-H]<sup>-</sup>; Expected: 131.0617, found: 131.0622 (err [ppm] = 3.12). Due to mixture of products <sup>13</sup>C NMR data was not collected and specific signals in the <sup>11</sup>B NMR spectrum were not assigned. NMR data matches literature values.<sup>4</sup>

PinBN(4-N(BPin)<sub>2</sub>CH<sub>2</sub>-C<sub>6</sub>H<sub>4</sub>)C(O)H, 1h''

<sup>1</sup>H NMR (500 MHz, C<sub>6</sub>D<sub>6</sub>) δ 7.84 (s, 1H), 7.08-7.06 (m, 2H), 6.33-6.31 (m, 2H), 5.36 (s, 2H), 1.01 (s, 36H). <sup>11</sup>B NMR (160 MHz, C<sub>6</sub>D<sub>6</sub>) δ 25.1, 21.7. MS (ESI) for [HN(4-CH<sub>2</sub>N(BPin)<sub>2</sub>-C<sub>6</sub>H<sub>4</sub>)C(O)H-H]<sup>-</sup>; Expected: 149.0719, found: 149.0720 (err [ppm] = 0.50). Due to mixture of products <sup>13</sup>C NMR data was not collected and specific signals in the <sup>11</sup>B NMR spectrum were not assigned.

PinBN(4-CF<sub>3</sub>-C<sub>6</sub>H<sub>4</sub>)C(O)H, 1i

<sup>1</sup>H NMR (500 MHz, C<sub>6</sub>D<sub>6</sub>) δ 9.03 (s, 1H), 7.31-7.29 (m, 2H), 7.09-7.07 (m, 2H), 0.93 (s, 12H). <sup>13</sup>C NMR (126 MHz, C<sub>6</sub>D<sub>6</sub>) δ 163.9, 140.5, 128.9 (q, *J* = 31.2 Hz), 128.3, 125.9 (q, *J* = 3.7 Hz), 124.8 (assumed q, half of the signal is swamped by other resonances but repeated 2D NMR and movement of the peaks with field strength allow confirmation of the labelled peak at 123.7 and small peak at 121.5 ppm to be the upfield 2:1 component of the 1:2:2:1 quartet, resonance reported then reported as the derived centre of the peak based on the measured coupling constant, *J* = 272 Hz), 84.6, 24.3. <sup>11</sup>B NMR (160 MHz, C<sub>6</sub>D<sub>6</sub>) δ 25.6. <sup>19</sup>F NMR (470 MHz, C<sub>6</sub>D<sub>6</sub>) δ -62.2. MS (ESI) for [HN(4-CF<sub>3</sub>-C<sub>6</sub>H<sub>4</sub>)C(O)H+HCOO]<sup>-</sup>; Expected: 234.0381, found: 234.0387 (err [ppm] = 2.90).

PinBN(4-CF<sub>3</sub>-C<sub>6</sub>H<sub>4</sub>)CH<sub>3</sub>, 1i'

<sup>1</sup>H NMR (500 MHz, C<sub>6</sub>D<sub>6</sub>) δ 7.41-7.39 (m, 2H), 7.32-7.30 (m, 2H), 2.85 (s, 3H), 1.07 (s, 12H). <sup>13</sup>C NMR (126 MHz, C<sub>6</sub>D<sub>6</sub>) δ 151.0, 126.0 (q, *J* = 3.8 Hz), 125.7 (q, *J* = 217.8 Hz), 122.4 (q, *J* = 34.3 Hz), 118.4, 83.3, 34.0, 24.7. <sup>11</sup>B NMR (160 MHz, C<sub>6</sub>D<sub>6</sub>) δ 24.6, 21.7. <sup>19</sup>F NMR (470 MHz, C<sub>6</sub>D<sub>6</sub>) δ -61.2. MS (ESI) for [HN(4-CF<sub>3</sub>-C<sub>6</sub>H<sub>4</sub>)CH<sub>3</sub>+H]<sup>+</sup>; Expected: 176.0681, found: 176.0682 (err [ppm] = -0.10). NMR data matches literature values.<sup>5</sup>

PinBN(3-NO<sub>2</sub>-C<sub>6</sub>H<sub>4</sub>)C(O)H, 1j

<sup>1</sup>H NMR (500 MHz, C<sub>6</sub>D<sub>6</sub>) δ 8.96 (s, 1H), 8.04 (t, *J* = 2.1 Hz, 1H), 7.63-7.61 (m, 1H), 7.21-7.18 (m, 1H), 6.72 (t, *J* = 8.1 Hz, 1H), 0.92 (s, 12H). <sup>11</sup>B NMR (160 MHz, C<sub>6</sub>D<sub>6</sub>) δ 25.4. MS (ESI) for [HN(3-NO<sub>2</sub>-C<sub>6</sub>H<sub>4</sub>)C(O)H-H]<sup>-</sup>; Expected: 165.0305, found: 165.0309 (err [ppm] = 2.19). Due to mixture of products <sup>13</sup>C NMR data was not collected. NMR data matches literature values.<sup>4</sup>

1-(H(O)CN(BPin))C<sub>6</sub>H<sub>4</sub>-4-(N(BPin)C(O)H), 1k

<sup>1</sup>H NMR (500 MHz, CDCl<sub>3</sub>) δ 8.86 (s, 2H), 7.15 (s, 2H), 1.30 (s, 24H). <sup>13</sup>C NMR (126 MHz, CDCl<sub>3</sub>) δ 165.5, 134.9, 127.6, 84.7, 24.6. <sup>11</sup>B NMR (160 MHz, CDCl<sub>3</sub>) δ 25.8. MS (ESI) for [H(O)CNHPNHHC(O)H+Na]<sup>+</sup>; Expected: 187.0475, found: 187.0479 (err [ppm] = 2.62). NMR data matches literature values.<sup>4</sup>

PinBN(iPr)C(NiPr)H, 3a

$^1\text{H}$  NMR (500 MHz,  $\text{C}_6\text{D}_6$ )  $\delta$  8.25 (s, 1H), 4.98 (hept,  $J = 6.9$  Hz, 1H), 3.31 (hept,  $J = 6.3$  Hz, 1H), 1.45 (d,  $J = 6.9$  Hz, 6H), 1.19 (d,  $J = 6.3$  Hz, 6H), 1.03 (s, 12H).  $^{13}\text{C}$  NMR (126 MHz,  $\text{C}_6\text{D}_6$ )  $\delta$  150.0, 82.8, 57.3, 43.7, 25.7, 24.6, 21.9.  $^{11}\text{B}$  NMR (160 MHz,  $\text{C}_6\text{D}_6$ )  $\delta$  25.3. MS (ESI) for  $[\text{HN}(\text{iPr})\text{C}(\text{NiPr})\text{H}+\text{H}]^+$ ; Expected: 129.1386, found: 129.1390 (err [ppm] = 2.70). NMR data matches literature values.<sup>6</sup>

PinBN(Cy)C(NCy)H, 3b

$^1\text{H}$  NMR (500 MHz,  $\text{C}_6\text{D}_6$ )  $\delta$  8.34 (s, 1H), 4.64 – 4.59 (m, 1H), 3.01 – 2.98 (m, 1H), 2.20 – 2.13 (m, 2H), 1.95 – 1.93 (m, 2H), 1.77 – 1.71 (m, 6H), 1.65 – 1.57 (m, 2H), 1.52 – 1.49 (m, 2H), 1.35 – 1.16 (m, 6H), 1.05 (s, 12H).  $^{13}\text{C}$  NMR (126 MHz,  $\text{C}_6\text{D}_6$ )  $\delta$  150.6, 82.8, 65.5, 51.8, 36.2, 32.1, 26.9, 26.3, 26.1, 25.4, 25.5.  $^{11}\text{B}$  NMR (160 MHz,  $\text{C}_6\text{D}_6$ )  $\delta$  25.4. MS (ESI) for  $[\text{HN}(\text{Cy})\text{C}(\text{NCy})\text{H}+\text{H}]^+$ ; Expected: 209.2010, found: 209.2015 (err [ppm] = 1.55). NMR data matches literature values.<sup>6</sup>

PinBN(4-Me-C<sub>6</sub>H<sub>4</sub>)C(N(4-Me-C<sub>6</sub>H<sub>4</sub>))H, 3c

$^1\text{H}$  NMR (500 MHz,  $\text{C}_6\text{D}_6$ )  $\delta$  8.65 (s, 1H), 7.32-7.02 (br m, 4H), 6.96 (br s, 4H), 2.08 (s, 6H), 1.01 (s, 12H).  $^{13}\text{C}$  NMR (126 MHz,  $\text{C}_6\text{D}_6$ )  $\delta$  151.5, 129.7, 128.4, 121.5, 83.9, 24.5, 20.9.  $^{11}\text{B}$  NMR (160 MHz,  $\text{C}_6\text{D}_6$ )  $\delta$  25.6. MS (ESI) for  $[\text{HN}(4\text{-Me-C}_6\text{H}_4)\text{C}(\text{N}(4\text{-Me-C}_6\text{H}_4))\text{H}+\text{H}]^+$ ; Expected: 225.1398, found: 225.1320 (err [ppm] = 2.73). NMR data matches literature values.<sup>6</sup>

## Xray Crystallography

Single crystals of [PinBN(4-NC-Ph)C(O)H] (1h) and [(6-Dipp)CuN(iPr)C(O)H] were run on a SuperNova, Dual, Cu at home/near, EosS2 diffractometer. The crystals were kept at 150.00(10) K during data collection. Using Olex2,<sup>7</sup> the structure was solved with the ShelXT<sup>8</sup> structure solution program using Intrinsic Phasing and refined with the ShelXL<sup>9</sup> refinement package using Least Squares minimisation.

1 guest molecule of benzene was present in the asymmetric unit of [(6-Dipp)CuN(iPr)C(O)H] and it was refined subject as 2 components, each treated as a rigid hexagon, to account for 60:40 disorder.

**Table S1:** Crystal data and structure refinement for PinBN(4-NC-C<sub>6</sub>H<sub>4</sub>)C(O)H and(6-Dipp)CuN(iPr)C(O)H.

|                                             |                                                                |                                                               |
|---------------------------------------------|----------------------------------------------------------------|---------------------------------------------------------------|
| Identification code                         | PinBN(4-NC-C <sub>6</sub> H <sub>4</sub> )C(O)H                | (6-Dipp)CuN(iPr)C(O)H                                         |
| Empirical formula                           | C <sub>14</sub> H <sub>17</sub> BN <sub>2</sub> O <sub>3</sub> | C <sub>38</sub> H <sub>54</sub> CuN <sub>3</sub> O            |
| Formula weight                              | 272.10                                                         | 632.38                                                        |
| Temperature/K                               | 150.00(10)                                                     | 150.00(10)                                                    |
| Crystal system                              | triclinic                                                      | monoclinic                                                    |
| Space group                                 | P-1                                                            | P2 <sub>1</sub> /n                                            |
| a/Å                                         | 7.9081(4)                                                      | 11.5493(1)                                                    |
| b/Å                                         | 9.4286(4)                                                      | 16.0557(1)                                                    |
| c/Å                                         | 9.6551(5)                                                      | 19.4851(2)                                                    |
| α/°                                         | 76.504(4)                                                      | 90                                                            |
| β/°                                         | 86.081(4)                                                      | 94.4500(10)                                                   |
| γ/°                                         | 83.312(4)                                                      | 90                                                            |
| Volume/Å <sup>3</sup>                       | 694.63(6)                                                      | 3602.27(5)                                                    |
| Z                                           | 2                                                              | 4                                                             |
| ρ <sub>calc</sub> /g/cm <sup>3</sup>        | 1.301                                                          | 1.166                                                         |
| μ/mm <sup>-1</sup>                          | 0.740                                                          | 1.082                                                         |
| F(000)                                      | 288.0                                                          | 1360.0                                                        |
| Crystal size/mm <sup>3</sup>                | 0.241 × 0.145 × 0.078                                          | 0.274 × 0.217 × 0.092                                         |
| Radiation                                   | Cu Kα (λ = 1.54184)                                            | CuKα (λ = 1.54184)                                            |
| 2θ range for data collection/°              | 9.428 to 144.482                                               | 7.142 to 146.144                                              |
| Index ranges                                | -8 ≤ h ≤ 9, -11 ≤ k ≤ 10, -11 ≤ l ≤ 10                         | -14 ≤ h ≤ 9, -19 ≤ k ≤ 19, -24 ≤ l ≤ 20                       |
| Reflections collected                       | 5451                                                           | 24948                                                         |
| Independent reflections                     | 2714 [R <sub>int</sub> = 0.0169, R <sub>sigma</sub> = 0.0241]  | 7138 [R <sub>int</sub> = 0.0201, R <sub>sigma</sub> = 0.0181] |
| Data/restraints/parameters                  | 2714/0/185                                                     | 7138/0/428                                                    |
| Goodness-of-fit on F <sup>2</sup>           | 1.027                                                          | 1.031                                                         |
| Final R indexes [I ≥ 2σ (I)]                | R <sub>1</sub> = 0.0341, wR <sub>2</sub> = 0.0893              | R <sub>1</sub> = 0.0301, wR <sub>2</sub> = 0.0805             |
| Final R indexes [all data]                  | R <sub>1</sub> = 0.0363, wR <sub>2</sub> = 0.0909              | R <sub>1</sub> = 0.0321, wR <sub>2</sub> = 0.0820             |
| Largest diff. peak/hole / e Å <sup>-3</sup> | 0.25/-0.21                                                     | 0.26/-0.40                                                    |

## Computational Details

DFT calculations were run with Gaussian 16 (C.01).<sup>10</sup> The Cu centres were described with the Stuttgart RECPs and associated basis sets,<sup>11</sup> and 6-31G\*\* basis sets were used for all other atoms (BS1).<sup>12</sup> Initial BP86<sup>13</sup> optimizations were performed using the 'grid = ultrafine' option, with all stationary points being fully characterized via analytical frequency calculations as minima (all positive eigenvalues). Lowest energy conformers of the stationary points were found by performing systematic conformational searches at the BP86/6-31G\*\* level of theory. All energies were recomputed with 6-311++G\*\* basis sets for all atoms except copper, for which the cc-pvtz-pp basis set and corresponding ECP was used (BS2).<sup>14,15</sup> Corrections for the effect of benzene ( $\epsilon = 2.2706$ ) solvent were run using the polarizable continuum model (PCM) and BS1.<sup>16</sup> Single-point dispersion corrections to the BP86 results employed Grimme's D3 parameter set with Becke-Johnson damping as implemented in Gaussian.<sup>17</sup>

### Breakdown of Energy Contributions

The following tables detail the evolution of the relative energies as the successive corrections to the initial SCF energy are included. Terms used are:

|                         |                                                                                   |
|-------------------------|-----------------------------------------------------------------------------------|
| $\Delta E_{BS1}$        | SCF energy computed with the BP86 functional with BS1                             |
| $\Delta H_{BS1}$        | Enthalpy at 0 K with BS1                                                          |
| $\Delta G_{BS1}$        | Free energy at 298.15 K and 1 atm with BS1                                        |
| $\Delta G_{BS1/bnz}$    | Free energy corrected for benzene solvent with BS1                                |
| $\Delta G_{BS1/bnz+D3}$ | Free energy corrected for benzene and dispersion effects with BS1                 |
| $\Delta E_{BS2}$        | SCF energy computed with the BP86 functional with BS2                             |
| $\Delta G_{bnz}$        | Free energy corrected for basis set (BS2), dispersion effects and benzene solvent |

In each case the final data used in the main article is highlighted in bold.

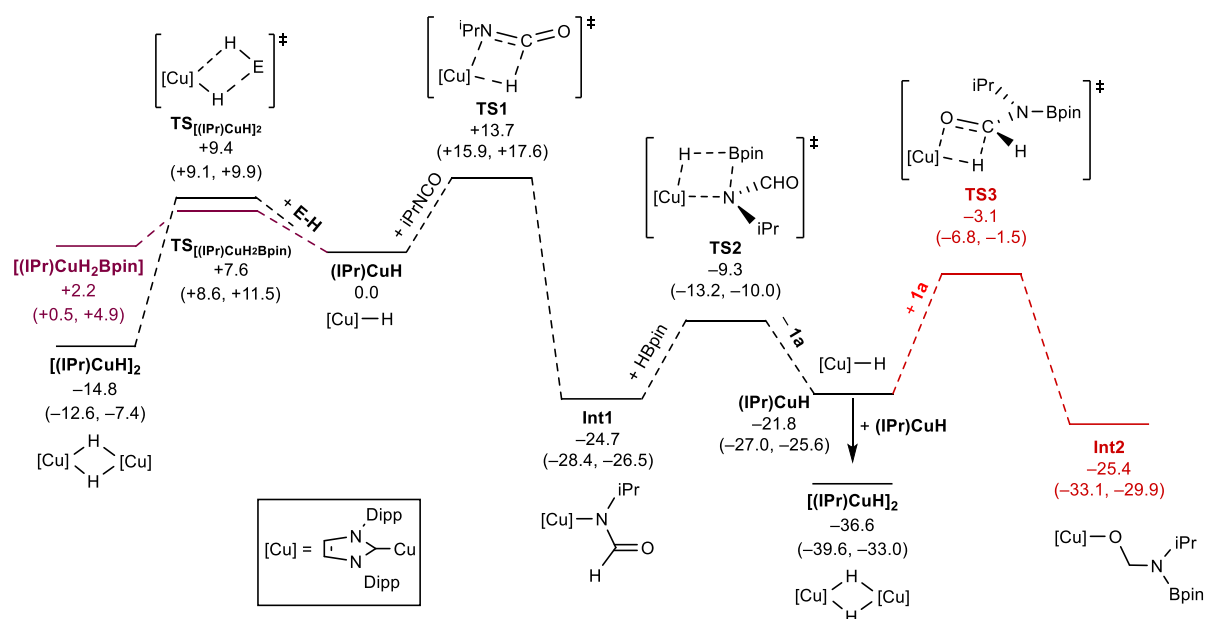

Figure S1: Computed pathway for hydroboration of iPrNCO, energies in brackets are calculated using other functionals (PBE0, wB97XD)

Table S2: Relative energies (kcal mol<sup>-1</sup>) for computed stationary points and transition states in the hydroboration of iPrNCO. Data in bold are those used in the main text. All energies are quoted relative to two IPrCuH, iPrNCO and two HBPIn at 0.0 kcal mol<sup>-1</sup>.

|                                                               | $\Delta E_{BS1}$ | $\Delta H_{BS1}$ | $\Delta G_{BS1}$ | $\Delta G_{BS1/bnz}$ | $\Delta G_{BS1/bnz+D3}$ | $\Delta E_{BS2}$ | $\Delta G_{bnz}$ |
|---------------------------------------------------------------|------------------|------------------|------------------|----------------------|-------------------------|------------------|------------------|
| <b>2 IPrCuH + iPrNCO + 2 HBPIn</b>                            | 0                | 0                | 0                | 0                    | 0                       | 0                | <b>0</b>         |
| <b>TS(IPrCuH) + iPrNCO + 2 HBPIn</b>                          | 0.52             | 0.40             | -2.26            | 14.95                | 9.15                    | 0.75             | <b>9.39</b>      |
| <b>[IPrCuH]<sub>2</sub> + iPrNCO + 2 PinBH</b>                | -                | -18.86           | -4.53            | 0.47                 | -12.23                  | -                | -                |
| <b>TS(IPrCuH<sub>2</sub>BPIn) + IPrCuH + 2 PinBH + iPrNCO</b> | 0.31             | 0.03             | 11.93            | 13.76                | 6.30                    | 1.57             | <b>7.56</b>      |
| <b>IPrCuH<sub>2</sub>BPIn + IPrCuH + 2 PinBH + iPrNCO</b>     | -5.36            | -4.51            | 7.43             | 9.24                 | 2.55                    | -5.75            | <b>2.16</b>      |
| <b>TS1 + 2 HBPIn + IPrCuH</b>                                 | 7.93             | 7.53             | 20.50            | 22.25                | 12.46                   | 9.17             | <b>13.70</b>     |
| <b>IPrCuN(iPr)C(O)H + 2 HBPIn + IPrCuH</b>                    | -                | -28.56           | -16.30           | -15.81               | -25.36                  | -                | -                |
| <b>TS2 + HBPIn + IPrCuH</b>                                   | 23.58            | -19.44           | 7.63             | 10.00                | -15.42                  | 17.50            | <b>-9.34</b>     |
| <b>2 IPrCuH + PinBN(iPr)C(O)H + HBPIn</b>                     | 35.08            | -31.86           | -18.55           | -18.45               | -25.15                  | 31.73            | <b>21.80</b>     |
| <b>TS(IPrCuH) + PinBN(iPr)C(O)H + PinBH</b>                   | 34.57            | -31.46           | -6.31            | -3.50                | -16.01                  | 30.98            | 12.41            |



|                                                        |       |        |        |        |        |       |              |
|--------------------------------------------------------|-------|--------|--------|--------|--------|-------|--------------|
|                                                        | -     | -50.71 | -23.08 | -17.98 | -37.38 | -     | -            |
| <b>[IPrCuH]<sub>2</sub> + PinBN(iPr)C(O)H + PinBH</b>  | 54.28 |        |        |        |        | 53.51 | <b>36.61</b> |
|                                                        | -     | -21.99 | 4.89   | 8.13   | -8.54  | -     | <b>-3.08</b> |
| <b>TS3 + HBPIn + IPrCuH</b>                            | 25.32 |        |        |        |        | 19.85 |              |
|                                                        | -     | -42.27 | -17.30 | -14.83 | -31.22 | -     | -            |
| <b>IPrCuOCH<sub>2</sub>N(iPr)BPIn + HBPIn + IPrCuH</b> | 49.04 |        |        |        |        | 43.27 | <b>25.44</b> |

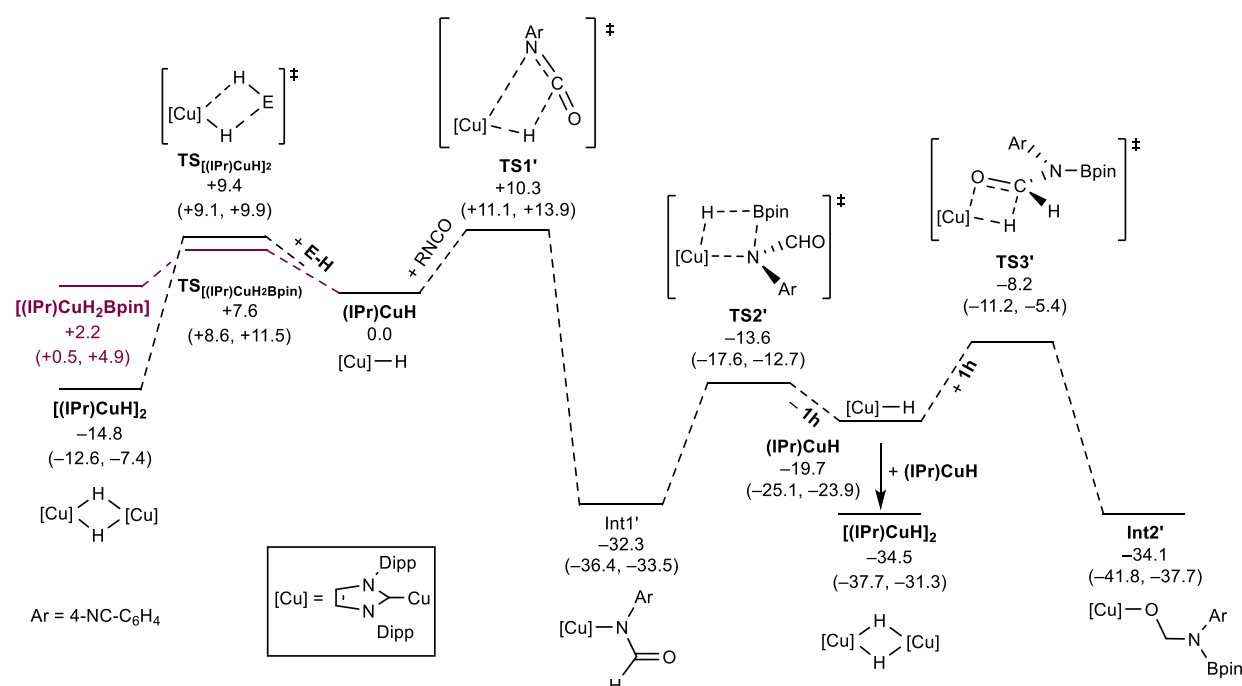

Figure S2: Computed pathway for hydroboration of 4-NC-C<sub>6</sub>H<sub>4</sub>NCO, energies in brackets are calculated using other functionals (PBE0, wB97XD)

Table S3: Relative energies (kcal mol<sup>-1</sup>) for computed stationary points and transition states in the hydroboration of 4-NC-C<sub>6</sub>H<sub>4</sub>NCO. Data in bold are those used in the main text. All energies are quoted relative to two IPrCuH, 4-NC-C<sub>6</sub>H<sub>4</sub>NCO and HBPIn at 0.0 kcal mol<sup>-1</sup>.

|                                                                                         | $\Delta E_{BS1}$ | $\Delta H_{BS1}$ | $\Delta G_{BS1}$ | $\Delta G_{BS1/bnz}$ | $\Delta G_{BS1/bnz+D3}$ | $\Delta E_{BS2}$ | $\Delta G_{bnz}$ |
|-----------------------------------------------------------------------------------------|------------------|------------------|------------------|----------------------|-------------------------|------------------|------------------|
| <b>2 IPrCuH + 4-NC-C<sub>6</sub>H<sub>4</sub>NCO + HBPIn</b>                            | 0                | 0                | 0                | 0                    | 0                       | 0                | <b>0</b>         |
| <b>TS(IPrCuH) + 4-NC-C<sub>6</sub>H<sub>4</sub>NCO + HBPIn</b>                          | 0.52             | 0.40             | 12.24            | 14.95                | -6.12                   | 9.15             | <b>9.39</b>      |
| <b>[IPrCuH]<sub>2</sub> + 4-NC-C<sub>6</sub>H<sub>4</sub>NCO + PinBH</b>                | -                | -18.86           | -4.53            | 0.47                 | 4.57                    | -                | -                |
|                                                                                         | 19.20            |                  |                  |                      |                         | 12.23            | <b>14.81</b>     |
| <b>TS(IPrCuH<sub>2</sub>BPIn) + IPrCuH + PinBH + 4-NC-C<sub>6</sub>H<sub>4</sub>NCO</b> | 0.31             | 0.03             | 11.93            | 13.76                | 6.30                    | 1.57             | <b>7.56</b>      |

|                                                                                         |       |        |        |        |        |       |              |
|-----------------------------------------------------------------------------------------|-------|--------|--------|--------|--------|-------|--------------|
| <b>IPrCuH<sub>2</sub>BPin + IPrCuH + PinBH<br/>+ p-NC-C<sub>6</sub>H<sub>4</sub>NCO</b> | -5.36 | -4.51  | 7.43   | 9.24   | 2.55   | -5.75 | <b>2.16</b>  |
| <b>TS1' + HBPin + IPrCuH</b>                                                            | 4.29  | 4.30   | 14.12  | 15.76  | 9.63   | 4.96  | <b>10.30</b> |
| <b>IPrCuN(4-NC-C<sub>6</sub>H<sub>4</sub>)C(O)H +<br/>HBPin + IPrCuH</b>                | -     | -34.98 | -23.17 | -22.66 | -33.16 | -     | -            |
|                                                                                         | 38.76 |        |        |        |        | 37.87 | <b>32.27</b> |
| <b>TS2' + IPrCuH</b>                                                                    | -     | -23.04 | 3.82   | 6.39   | -19.24 | -     | -            |
|                                                                                         | 27.09 |        |        |        |        | 21.49 | <b>13.63</b> |
| <b>2 IPrCuH + PinBN(4-NC-<br/>C<sub>6</sub>H<sub>4</sub>)C(O)H +</b>                    | -     | -28.39 | -15.43 | -15.58 | -22.29 | -     | -            |
|                                                                                         | 31.37 |        |        |        |        | 28.77 | <b>19.70</b> |
| <b>TS(IPrCuH) + PinBN(4-NC-<br/>C<sub>6</sub>H<sub>4</sub>)C(O)H</b>                    | -     | -28.00 | -3.19  | -0.63  | -13.14 | -     | -            |
|                                                                                         | 30.85 |        |        |        |        | 28.02 | 10.31        |
| <b>[IPrCuH]<sub>2</sub> + PinBN(4-NC-<br/>C<sub>6</sub>H<sub>4</sub>)C(O)H</b>          | -     | -47.25 | -19.96 | -15.10 | -34.52 | -     | -            |
|                                                                                         | 50.56 |        |        |        |        | 50.55 | <b>34.51</b> |
| <b>TS3' + IPrCuH</b>                                                                    | -     | -23.22 | 3.79   | 6.61   | -12.90 | -     | <b>-8.15</b> |
|                                                                                         | 26.28 |        |        |        |        | 21.52 |              |
| <b>IPrCuOCH<sub>2</sub>N(4-NC-C<sub>6</sub>H<sub>4</sub>)BPin +<br/>IPrCuH</b>          | -     | -48.98 | -23.37 | -21.06 | -39.13 | -     | -            |
|                                                                                         | 56.27 |        |        |        |        | 51.21 | <b>34.07</b> |

## Cartesian Coordinates and Computed Energies [in Hartrees]

IPrCuH  
SCF (BP86) Energy = -1357.65730419  
Enthalpy 0K = -1357.530864  
Enthalpy 298K = -1357.529920  
Free Energy 298K = -1357.633020  
Lowest Frequency = 11.6670 cm-1  
Second Frequency = 22.0948 cm-1  
SCF (BP86-D3BJ) Energy = -  
1358.28187487  
SCF (C6H6) Energy = -1358.13401638  
SCF (BS2) Energy = -1358.40435178  
SCF (PBE0-D3BJ-BS2-C6H6) Energy = -  
1356.929371  
SCF (wB97XD-BS2-C6H6) Energy = -  
1357.97

|    |          |          |          |
|----|----------|----------|----------|
| Cu | 0.00012  | -0.00012 | 1.96105  |
| N  | -1.08184 | 0.00008  | -0.80884 |
| N  | 1.08176  | 0.00014  | -0.80887 |
| C  | -0.00003 | -0.00010 | 0.04864  |
| C  | -0.68419 | 0.00048  | -2.14774 |
| H  | -1.40288 | 0.00067  | -2.96270 |
| C  | 0.68409  | 0.00049  | -2.14776 |
| H  | 1.40275  | 0.00068  | -2.96274 |
| C  | -2.46649 | -0.00001 | -0.37919 |
| C  | -3.11721 | 1.24366  | -0.18534 |
| C  | -4.46821 | 1.21287  | 0.21154  |
| H  | -4.99755 | 2.15689  | 0.37761  |
| C  | -5.13961 | -0.00014 | 0.40601  |
| H  | -6.18963 | -0.00019 | 0.71686  |
| C  | -4.46801 | -1.21308 | 0.21182  |
| H  | -4.99720 | -2.15713 | 0.37813  |
| C  | -3.11702 | -1.24374 | -0.18511 |
| C  | -2.40027 | 2.58332  | -0.34822 |
| H  | -1.39558 | 2.38367  | -0.75996 |
| C  | -2.20763 | 3.26287  | 1.02753  |
| H  | -3.18037 | 3.49320  | 1.49658  |
| H  | -1.65341 | 4.21104  | 0.91520  |
| H  | -1.64496 | 2.60941  | 1.71632  |
| C  | -3.12920 | 3.51627  | -1.34041 |
| H  | -4.13235 | 3.79664  | -0.97487 |
| H  | -3.25310 | 3.04185  | -2.32875 |
| H  | -2.55644 | 4.44966  | -1.47747 |
| C  | -2.39995 | -2.58333 | -0.34796 |
| H  | -1.39522 | -2.38356 | -0.75955 |
| C  | -2.20744 | -3.26301 | 1.02775  |
| H  | -1.64517 | -2.60944 | 1.71678  |
| H  | -1.65285 | -4.21096 | 0.91543  |
| H  | -3.18021 | -3.49377 | 1.49652  |
| C  | -3.12868 | -3.51624 | -1.34033 |
| H  | -4.13187 | -3.79670 | -0.97495 |
| H  | -2.55585 | -4.44959 | -1.47739 |
| H  | -3.25248 | -3.04174 | -2.32865 |
| C  | 2.46639  | 0.00005  | -0.37919 |
| C  | 3.11697  | -1.24370 | -0.18531 |
| C  | 4.46792  | -1.21307 | 0.21171  |
| H  | 4.99714  | -2.15713 | 0.37785  |
| C  | 5.13946  | -0.00013 | 0.40623  |
| H  | 6.18945  | -0.00021 | 0.71716  |
| C  | 4.46802  | 1.21288  | 0.21196  |

|   |         |          |          |
|---|---------|----------|----------|
| H | 4.99730 | 2.15688  | 0.37828  |
| C | 3.11705 | 1.24369  | -0.18502 |
| C | 2.40016 | 2.58338  | -0.34788 |
| H | 1.39528 | 2.38374  | -0.75915 |
| C | 2.20814 | 3.26335  | 1.02774  |
| H | 1.64609 | 2.60995  | 1.71709  |
| H | 1.65352 | 4.21129  | 0.91539  |
| H | 3.18106 | 3.49423  | 1.49614  |
| C | 3.12882 | 3.51595  | -1.34064 |
| H | 4.13224 | 3.79609  | -0.97567 |
| H | 2.55625 | 4.44947  | -1.47761 |
| H | 3.25208 | 3.04129  | -2.32896 |
| C | 2.39998 | -2.58330 | -0.34844 |
| H | 1.39525 | -2.38354 | -0.75999 |
| C | 2.20752 | -3.26330 | 1.02711  |
| H | 1.65270 | -4.21110 | 0.91459  |
| H | 1.64548 | -2.60981 | 1.71637  |
| H | 3.18029 | -3.49442 | 1.49570  |
| C | 3.12883 | -3.51592 | -1.34102 |
| H | 4.13232 | -3.79578 | -0.97601 |
| H | 3.25199 | -3.04140 | -2.32942 |
| H | 2.55644 | -4.44958 | -1.47781 |
| H | 0.00025 | 0.00006  | 3.47636  |

[IPrCuH]<sub>2</sub>  
SCF (BP86) Energy = -2715.31978252  
Enthalpy 0K = -2715.090422  
Enthalpy 298K = -2715.089478  
Free Energy 298K = -2715.273256  
Lowest Frequency = 5.9974 cm-1  
Second Frequency = 12.5657 cm-1  
SCF (BP86-D3BJ) Energy = -  
2716.61458581  
SCF (C6H6) Energy = -2716.29065827  
SCF (BS2) Energy = -2716.84340985  
SCF (PBE0-D3BJ-BS2-C6H6) Energy = -  
2713.90223  
SCF (wB97XD-BS2-C6H6) Energy = -  
2715.977008

|    |          |          |          |
|----|----------|----------|----------|
| Cu | -1.16732 | 0.00003  | 0.00005  |
| Cu | 1.16730  | 0.00004  | 0.00004  |
| N  | -3.92546 | 1.06258  | 0.21097  |
| N  | -3.92542 | -1.06266 | -0.21109 |
| N  | 3.92542  | 1.06264  | -0.21101 |
| N  | 3.92542  | -1.06260 | 0.21108  |
| C  | -3.05897 | -0.00003 | -0.00003 |
| C  | -5.26590 | 0.67015  | 0.13226  |
| H  | -6.08114 | 1.37499  | 0.27126  |
| C  | -5.26588 | -0.67026 | -0.13247 |
| H  | -6.08109 | -1.37512 | -0.27152 |
| C  | -3.49803 | 2.41323  | 0.49806  |
| C  | -3.27883 | 3.30377  | -0.58263 |
| C  | -2.88297 | 4.61936  | -0.27158 |
| H  | -2.70131 | 5.32871  | -1.08620 |
| C  | -2.71470 | 5.03122  | 1.05595  |
| H  | -2.40681 | 6.05940  | 1.27507  |
| C  | -2.93605 | 4.12898  | 2.10359  |
| H  | -2.79608 | 4.45653  | 3.13944  |
| C  | -3.33053 | 2.80060  | 1.85149  |
| C  | -3.44369 | 2.88262  | -2.04225 |

|   |          |          |          |   |          |          |          |
|---|----------|----------|----------|---|----------|----------|----------|
| H | -3.80517 | 1.83996  | -2.05409 | C | 2.08582  | 2.90399  | 2.78025  |
| C | -2.08593 | 2.90401  | -2.78030 | H | 1.65266  | 3.91996  | 2.79251  |
| H | -1.65283 | 3.92001  | -2.79264 | H | 2.21520  | 2.58014  | 3.82807  |
| H | -2.21534 | 2.58009  | -3.82809 | H | 1.36460  | 2.22467  | 2.29515  |
| H | -1.36467 | 2.22476  | -2.29517 | C | 4.49560  | 3.74959  | 2.77026  |
| C | -4.49572 | 3.74959  | -2.77020 | H | 4.18394  | 4.80763  | 2.82290  |
| H | -5.47426 | 3.71410  | -2.26131 | H | 5.47415  | 3.71413  | 2.26139  |
| H | -4.63485 | 3.39366  | -3.80587 | H | 4.63470  | 3.39363  | 3.80592  |
| H | -4.18409 | 4.80764  | -2.82281 | C | 3.55292  | 1.83832  | -3.01768 |
| C | -3.55296 | 1.83821  | 3.01766  | H | 3.86704  | 0.86695  | -2.59880 |
| H | -3.86703 | 0.86683  | 2.59876  | C | 2.24069  | 1.59537  | -3.79695 |
| C | -2.24079 | 1.59527  | 3.79704  | H | 1.46313  | 1.18249  | -3.13216 |
| H | -1.46319 | 1.18239  | 3.13231  | H | 2.41281  | 0.87858  | -4.61936 |
| H | -2.41298 | 0.87850  | 4.61944  | H | 1.85902  | 2.53110  | -4.24292 |
| H | -1.85915 | 2.53100  | 4.24303  | C | 4.68149  | 2.33191  | -3.95136 |
| C | -4.68162 | 2.33179  | 3.95125  | H | 4.42230  | 3.29504  | -4.42535 |
| H | -4.42249 | 3.29494  | 4.42522  | H | 4.85816  | 1.60098  | -4.75962 |
| H | -4.85833 | 1.60088  | 4.75951  | H | 5.62937  | 2.47315  | -3.40410 |
| H | -5.62946 | 2.47300  | 3.40390  | C | 3.49799  | -2.41325 | 0.49815  |
| C | -3.49795 | -2.41330 | -0.49817 | C | 3.27889  | -3.30381 | -0.58254 |
| C | -3.33038 | -2.80065 | -1.85160 | C | 2.88302  | -4.61940 | -0.27150 |
| C | -2.93586 | -4.12902 | -2.10369 | H | 2.70145  | -5.32877 | -1.08611 |
| H | -2.79584 | -4.45656 | -3.13953 | C | 2.71464  | -5.03123 | 1.05602  |
| C | -2.71454 | -5.03126 | -1.05604 | H | 2.40674  | -6.05941 | 1.27514  |
| H | -2.40662 | -6.05943 | -1.27516 | C | 2.93588  | -4.12897 | 2.10367  |
| C | -2.88287 | -4.61942 | 0.27148  | H | 2.79583  | -4.45650 | 3.13952  |
| H | -2.70123 | -5.32876 | 1.08611  | C | 3.33037  | -2.80059 | 1.85158  |
| C | -3.27877 | -3.30384 | 0.58252  | C | 3.55269  | -1.83817 | 3.01775  |
| C | -3.55276 | -1.83825 | -3.01777 | H | 3.86670  | -0.86678 | 2.59884  |
| H | -3.86680 | -0.86687 | -2.59886 | C | 2.24047  | -1.59533 | 3.79708  |
| C | -2.24056 | -1.59535 | -3.79711 | H | 1.46287  | -1.18246 | 3.13233  |
| H | -1.46295 | -1.18251 | -3.13235 | H | 2.41259  | -0.87856 | 4.61950  |
| H | -2.41269 | -0.87854 | -4.61949 | H | 1.85886  | -2.53108 | 4.24304  |
| H | -1.85894 | -2.53108 | -4.24313 | C | 4.68135  | -2.33167 | 3.95137  |
| C | -4.68140 | -2.33179 | -3.95138 | H | 4.42228  | -3.29485 | 4.42532  |
| H | -4.42230 | -3.29496 | -4.42533 | H | 4.85797  | -1.60075 | 4.75965  |
| H | -4.85806 | -1.60088 | -4.75966 | H | 5.62922  | -2.47279 | 3.40406  |
| H | -5.62927 | -2.47295 | -3.40406 | C | 3.44388  | -2.88269 | -2.04215 |
| C | -3.44368 | -2.88270 | 2.04214  | H | 3.80540  | -1.84004 | -2.05398 |
| H | -3.80518 | -1.84004 | 2.05398  | C | 2.08618  | -2.90405 | -2.78031 |
| C | -2.08595 | -2.90407 | 2.78023  | H | 2.21569  | -2.58017 | -3.82810 |
| H | -2.21539 | -2.58018 | 3.82802  | H | 1.36491  | -2.22474 | -2.29527 |
| H | -1.36469 | -2.22479 | 2.29514  | H | 1.65305  | -3.92003 | -2.79264 |
| H | -1.65282 | -3.92006 | 2.79256  | C | 4.49594  | -3.74970 | -2.77001 |
| C | -4.49573 | -3.74969 | 2.77006  | H | 4.18426  | -4.80774 | -2.82266 |
| H | -5.47425 | -3.71421 | 2.26113  | H | 5.47444  | -3.71425 | -2.26103 |
| H | -4.63490 | -3.39376 | 3.80572  | H | 4.63518  | -3.39377 | -3.80567 |
| H | -4.18407 | -4.80773 | 2.82268  | H | 0.00001  | -0.00002 | -1.24681 |
| C | 3.05895  | 0.00001  | 0.00005  | H | -0.00005 | 0.00002  | 1.24692  |
| C | 5.26587  | 0.67022  | -0.13236 |   |          |          |          |
| H | 6.08109  | 1.37507  | -0.27142 |   |          |          |          |
| C | 5.26588  | -0.67018 | 0.13238  |   |          |          |          |
| H | 6.08109  | -1.37505 | 0.27140  |   |          |          |          |
| C | 3.49800  | 2.41330  | -0.49807 |   |          |          |          |
| C | 3.27878  | 3.30381  | 0.58264  |   |          |          |          |
| C | 2.88294  | 4.61942  | 0.27161  |   |          |          |          |
| H | 2.70127  | 5.32874  | 1.08624  |   |          |          |          |
| C | 2.71473  | 5.03131  | -1.05591 |   |          |          |          |
| H | 2.40686  | 6.05950  | -1.27502 |   |          |          |          |
| C | 2.93609  | 4.12909  | -2.10357 |   |          |          |          |
| H | 2.79616  | 4.45667  | -3.13942 |   |          |          |          |
| C | 3.33054  | 2.80070  | -1.85149 |   |          |          |          |
| C | 3.44360  | 2.88263  | 2.04225  |   |          |          |          |
| H | 3.80509  | 1.83997  | 2.05408  |   |          |          |          |

  

|                                     |  |  |  |  |  |  |  |
|-------------------------------------|--|--|--|--|--|--|--|
| IPrCuH2BPin                         |  |  |  |  |  |  |  |
| SCF (BP86) Energy = -1769.99185401  |  |  |  |  |  |  |  |
| Enthalpy 0K = -1769.199047          |  |  |  |  |  |  |  |
| Enthalpy 298K = -1769.198103        |  |  |  |  |  |  |  |
| Free Energy 298K = -1769.326766     |  |  |  |  |  |  |  |
| Lowest Frequency = 12.7789 cm-1     |  |  |  |  |  |  |  |
| Second Frequency = 15.1854 cm-1     |  |  |  |  |  |  |  |
| SCF (BP86-D3BJ) Energy = -          |  |  |  |  |  |  |  |
| 1770.19160071                       |  |  |  |  |  |  |  |
| SCF (C6H6) Energy = -1769.99882302  |  |  |  |  |  |  |  |
| SCF (BS2) Energy = -1770.37899407   |  |  |  |  |  |  |  |
| SCF (PBE0-D3BJ-BS2-C6H6) Energy = - |  |  |  |  |  |  |  |
| 1768.459759                         |  |  |  |  |  |  |  |

SCF (wB97XD-BS2-C6H6) Energy = -  
1769.841938

|    |          |          |          |
|----|----------|----------|----------|
| Cu | 0.59125  | -0.00598 | 0.00120  |
| N  | -2.12389 | 1.10028  | -0.02103 |
| N  | -2.14186 | -1.06924 | 0.01782  |
| C  | -1.27823 | 0.00844  | -0.00094 |
| C  | -3.46601 | 0.71017  | -0.01544 |
| H  | -4.27480 | 1.43543  | -0.02913 |
| C  | -3.47734 | -0.65699 | 0.00920  |
| H  | -4.29805 | -1.36876 | 0.02129  |
| C  | -1.67037 | 2.47529  | -0.04439 |
| C  | -1.45050 | 3.09709  | -1.29911 |
| C  | -1.02058 | 4.43825  | -1.29075 |
| H  | -0.83758 | 4.94582  | -2.24373 |
| C  | -0.81681 | 5.12749  | -0.08936 |
| H  | -0.47869 | 6.16892  | -0.10706 |
| C  | -1.03831 | 4.48519  | 1.13471  |
| H  | -0.86880 | 5.02912  | 2.06998  |
| C  | -1.46916 | 3.14536  | 1.18846  |
| C  | -1.65466 | 2.37181  | -2.62876 |
| H  | -1.98529 | 1.34233  | -2.40681 |
| C  | -0.32955 | 2.26737  | -3.41750 |
| H  | 0.06257  | 3.26521  | -3.68128 |
| H  | -0.48739 | 1.71055  | -4.35760 |
| H  | 0.44075  | 1.74200  | -2.82881 |
| C  | -2.76018 | 3.04492  | -3.47388 |
| H  | -2.48389 | 4.07748  | -3.75024 |
| H  | -3.71807 | 3.08993  | -2.92806 |
| H  | -2.92478 | 2.48267  | -4.40934 |
| C  | -1.68961 | 2.47075  | 2.54202  |
| H  | -2.03703 | 1.43974  | 2.35541  |
| C  | -0.36730 | 2.37235  | 3.33640  |
| H  | 0.39376  | 1.81119  | 2.76907  |
| H  | -0.53545 | 1.85476  | 4.29690  |
| H  | 0.04222  | 3.37265  | 3.56163  |
| C  | -2.78523 | 3.19004  | 3.36142  |
| H  | -2.49213 | 4.22591  | 3.60616  |
| H  | -2.96191 | 2.66092  | 4.31384  |
| H  | -3.74078 | 3.23410  | 2.81149  |
| C  | -1.71120 | -2.45150 | 0.04242  |
| C  | -1.50471 | -3.07656 | 1.29784  |
| C  | -1.09712 | -4.42469 | 1.29076  |
| H  | -0.92470 | -4.93495 | 2.24428  |
| C  | -0.90208 | -5.11748 | 0.08996  |
| H  | -0.58137 | -6.16439 | 0.10863  |
| C  | -1.11011 | -4.47192 | -1.13476 |
| H  | -0.94759 | -5.01883 | -2.06954 |
| C  | -1.51847 | -3.12509 | -1.18978 |
| C  | -1.72430 | -2.44685 | -2.54382 |
| H  | -2.05665 | -1.41075 | -2.35796 |
| C  | -0.39784 | -2.36845 | -3.33358 |
| H  | 0.36964  | -1.81893 | -2.76351 |
| H  | -0.55468 | -1.84837 | -4.29466 |
| H  | -0.00286 | -3.37495 | -3.55727 |
| C  | -2.82789 | -3.14894 | -3.36733 |
| H  | -2.54957 | -4.18884 | -3.61216 |
| H  | -2.99353 | -2.61638 | -4.31982 |
| H  | -3.78577 | -3.17916 | -2.82052 |
| C  | -1.69884 | -2.34733 | 2.62688  |
| H  | -2.01643 | -1.31392 | 2.40408  |
| C  | -0.37163 | -2.25935 | 3.41421  |
| H  | -0.52159 | -1.70105 | 4.35472  |
| H  | 0.40443  | -1.74321 | 2.82488  |

|   |          |          |          |
|---|----------|----------|----------|
| H | 0.00841  | -3.26216 | 3.67691  |
| C | -2.81212 | -3.00493 | 3.47402  |
| H | -2.54878 | -4.04031 | 3.75238  |
| H | -3.77097 | -3.03886 | 2.92907  |
| H | -2.96880 | -2.43882 | 4.40853  |
| H | 1.86348  | -0.03220 | -1.08339 |
| C | 4.84665  | -0.78982 | -0.22935 |
| C | 4.85503  | 0.72284  | 0.23306  |
| B | 2.68152  | -0.02209 | 0.00362  |
| O | 3.51082  | 1.14961  | -0.09193 |
| O | 3.49844  | -1.20239 | 0.09827  |
| C | 5.05584  | 0.87027  | 1.75620  |
| H | 6.09107  | 0.64207  | 2.06462  |
| H | 4.83026  | 1.91030  | 2.04533  |
| H | 4.37125  | 0.20375  | 2.30629  |
| C | 5.84187  | 1.62515  | -0.51835 |
| H | 6.88303  | 1.28919  | -0.36687 |
| H | 5.62815  | 1.63896  | -1.59791 |
| H | 5.76067  | 2.65971  | -0.14383 |
| C | 5.04277  | -0.93928 | -1.75284 |
| H | 6.07960  | -0.72153 | -2.06341 |
| H | 4.80608  | -1.97697 | -2.04146 |
| H | 4.36381  | -0.26587 | -2.30152 |
| C | 5.82525  | -1.70251 | 0.52018  |
| H | 5.73287  | -2.73607 | 0.14548  |
| H | 6.86954  | -1.37716 | 0.36718  |
| H | 5.61307  | -1.71449 | 1.60008  |
| H | 1.86197  | -0.00357 | 1.08985  |

iPrNCO

SCF (BP86) Energy = -286.624600900

Enthalpy 0K = -286.512862

Enthalpy 298K = -286.511918

Free Energy 298K = -286.551411

Lowest Frequency = 33.3619 cm<sup>-1</sup>

Second Frequency = 121.3205 cm<sup>-1</sup>

SCF (BP86-D3BJ) Energy = -  
286.639324976

SCF (C6H6) Energy = -286.626294929

SCF (BS2) Energy = -286.707993051

SCF (PBE0-D3BJ-BS2-C6H6) Energy = -  
286.3768196

SCF (wB97XD-BS2-C6H6) Energy = -  
286.6092804

|   |          |          |          |
|---|----------|----------|----------|
| N | 0.45342  | 0.00065  | 0.73866  |
| C | -0.97870 | -0.00006 | 0.44034  |
| H | -1.48462 | -0.00004 | 1.42326  |
| C | -1.38175 | 1.27849  | -0.31398 |
| H | -0.90818 | 1.30562  | -1.31088 |
| H | -2.47588 | 1.31284  | -0.45115 |
| H | -1.07227 | 2.17768  | 0.24213  |
| C | -1.38037 | -1.27922 | -0.31356 |
| H | -1.06966 | -2.17794 | 0.24264  |
| H | -2.47443 | -1.31503 | -0.45078 |
| H | -0.90678 | -1.30582 | -1.31046 |
| C | 1.49310  | 0.00027  | 0.09791  |
| O | 2.58803  | 0.00016  | -0.37745 |

IPrCuN(iPr)C(O)H

SCF (BP86) Energy = -1644.04548414

Enthalpy 0K = -1644.088369

Enthalpy 298K = -1644.087425  
 Free Energy 298K = -1644.210410  
 Lowest Frequency = 9.4738 cm-1  
 Second Frequency = 16.4640 cm-1  
 SCF (BP86-D3BJ) Energy = -  
 1644.98759631  
 SCF (C6H6) Energy = -1644.81071355  
 SCF (BS2) Energy = -1645.16248196  
 SCF (PBE0-D3BJ-BS2-C6H6) Energy = -  
 1643.376704  
 SCF (wB97XD-BS2-C6H6) Energy = -  
 1644.647582

Cu -0.06318 -0.92872 0.75476  
 O -1.72850 -3.79844 2.98122  
 N 1.03435 1.26083 -0.88937  
 N -1.13333 1.21486 -0.89617  
 N -0.20885 -2.40739 1.87286  
 C -0.03652 0.55874 -0.37353  
 C 2.42341 0.95025 -0.61889  
 C 3.10009 0.05585 -1.48541  
 C 4.45170 -0.22144 -1.20170  
 H 5.00209 -0.91277 -1.84852  
 C 5.09880 0.36664 -0.10813  
 C 6.14940 0.13412 0.09506  
 C 4.40436 1.25024 0.72696  
 H 4.91780 1.70331 1.58153  
 C 3.05179 1.56546 0.49255  
 C 2.42240 -0.60509 -2.68554  
 H 1.38304 -0.23670 -2.73514  
 C 2.35769 -2.13963 -2.51511  
 H 3.36776 -2.58178 -2.45983  
 H 1.83654 -2.59978 -3.37238  
 H 1.81561 -2.41358 -1.59461  
 C 3.11641 -0.21760 -4.01129  
 H 3.13809 0.87622 -4.15371  
 H 2.58320 -0.66442 -4.86809  
 H 4.15872 -0.57987 -4.04290  
 C 2.32093 2.52951 1.42690  
 H 1.29655 2.66798 1.03962  
 C 2.19758 1.93968 2.85012  
 H 1.66246 0.97555 2.83396  
 H 1.64267 2.63240 3.50632  
 H 3.19054 1.77123 3.30247  
 C 2.99868 3.91840 1.45260  
 H 4.02292 3.86187 1.86047  
 H 2.42541 4.61244 2.09113  
 H 3.06459 4.35703 0.44243  
 C -2.50890 0.83898 -0.63412  
 C -3.13275 -0.09686 -1.49651  
 C -4.47309 -0.43306 -1.22441  
 H -4.98207 -1.15953 -1.86643  
 C -5.15942 0.13618 -0.14511  
 H -6.19991 -0.14364 0.04983  
 C -4.51483 1.05619 0.69041  
 H -5.05635 1.48889 1.53810  
 C -3.17525 1.43014 0.46827  
 C -2.40608 -0.75526 -2.66881  
 H -1.39373 -0.31910 -2.73067  
 C -2.23932 -2.27368 -2.42988  
 H -1.69172 -2.47030 -1.49265  
 H -1.68022 -2.73459 -3.26273  
 H -3.21866 -2.77865 -2.36204  
 C -3.11513 -0.47223 -4.01243

H -4.12892 -0.90833 -4.03542  
 H -2.54515 -0.91571 -4.84704  
 H -3.21225 0.61059 -4.20064  
 C -2.49453 2.41918 1.41396  
 H -1.46972 2.59521 1.04299  
 C -2.37327 1.82764 2.83709  
 H -3.36698 1.63415 3.27726  
 H -1.84280 2.53148 3.50176  
 H -1.81752 0.87498 2.82528  
 C -3.22167 3.78279 1.43290  
 H -3.28457 4.22395 0.42356  
 H -2.68606 4.49392 2.08527  
 H -4.25061 3.68713 1.82107  
 C 0.90934 -3.27179 2.30977  
 H 0.66827 -3.62497 3.33145  
 C 2.21752 -2.47283 2.34664  
 H 2.47276 -2.08414 1.34193  
 H 3.05695 -3.10651 2.68450  
 H 2.13673 -1.61228 3.03269  
 C 1.02607 -4.51770 1.41000  
 H 0.08054 -5.08140 1.43341  
 H 1.83834 -5.18388 1.75393  
 H 1.23954 -4.22278 0.36601  
 C -1.45312 -2.80600 2.28606  
 H -2.25773 -2.10787 1.92628  
 C -0.75413 2.28548 -1.70724  
 H -1.48517 2.91722 -2.20412  
 C 0.61370 2.31479 -1.70350  
 H 1.31998 2.97730 -2.19607

PinBH  
 SCF (BP86) Energy = -411.857276480  
 Enthalpy 0K = -411.662324  
 Enthalpy 298K = -411.661379  
 Free Energy 298K = -411.705588  
 Lowest Frequency = 87.9830 cm-1  
 Second Frequency = 214.9008 cm-1  
 SCF (BP86-D3BJ) Energy = -  
 411.890528919  
 SCF (C6H6) Energy = -411.859141657  
 SCF (BS2) Energy = -411.965484248  
 SCF (PBE0-D3BJ-BS2-C6H6) Energy = -  
 411.5107886  
 SCF (wB97XD-BS2-C6H6) Energy = -  
 411.8584391

C 0.79096 0.19447 0.04645  
 C -0.79102 0.19460 -0.04645  
 B -0.00015 -1.95002 0.00000  
 O -1.09223 -1.20509 -0.38673  
 O 1.09198 -1.20518 0.38672  
 C -1.48266 0.46945 1.30009  
 H -1.37209 1.52289 1.60705  
 H -2.55757 0.24770 1.20199  
 H -1.07464 -0.17310 2.09746  
 C -1.37864 1.09161 -1.13987  
 H -1.13471 2.15108 -0.95008  
 H -1.00336 0.81786 -2.13710  
 H -2.47634 0.99207 -1.15015  
 C 1.48280 0.46924 -1.30003  
 H 1.37238 1.52269 -1.60700  
 H 2.55768 0.24738 -1.20175  
 H 1.07486 -0.17326 -2.09748

C 1.37882 1.09142 1.13982  
H 2.47649 0.99155 1.15012  
H 1.13516 2.15092 0.94993  
H 1.00349 0.81785 2.13708  
H -0.00018 -3.14804 -0.00000

PinBN(iPr)C(O)H

SCF (BP86) Energy = -698.537787458

Enthalpy 0K = -698.225491

Enthalpy 298K = -698.224547

Free Energy 298K = -698.286559

Lowest Frequency = 36.2777 cm-1

Second Frequency = 55.2277 cm-1

SCF (BP86-D3BJ) Energy = -

698.596445632

SCF (C6H6) Energy = -698.541193593

SCF (BS2) Energy = -698.724049796

SCF (PBE0-D3BJ-BS2-C6H6) Energy = -

697.9570337

SCF (wB97XD-BS2-C6H6) Energy = -

698.5348924

O 3.39524 2.03440 -0.22073

N 1.69014 0.45079 -0.05508

C 2.67315 -0.66430 0.07524

H 3.65299 -0.16139 0.00685

C 2.53964 -1.65823 -1.09003

H 1.55940 -2.16201 -1.07144

H 3.32503 -2.43006 -1.01845

H 2.65451 -1.14475 -2.05915

C 2.55669 -1.34360 1.45000

H 2.68624 -0.60884 2.26202

H 3.34141 -2.11194 1.55827

H 1.57623 -1.83272 1.57045

C 2.20115 1.74492 -0.19048

H 1.39253 2.50504 -0.27198

B 0.25383 0.25283 -0.04262

O -0.34448 -0.97783 0.17813

O -0.64374 1.28995 -0.24715

C -1.77563 -0.79672 -0.10754

C -1.96775 0.76060 0.10477

C -2.57069 -1.68590 0.85207

C -1.99773 -1.24135 -1.56320

C -3.00386 1.41725 -0.81125

C -2.22478 1.14524 1.57202

H -3.65528 -1.53707 0.71352

H -2.34533 -2.74582 0.64988

H -2.31854 -1.47843 1.90257

H -3.06439 -1.20333 -1.84034

H -1.43119 -0.60842 -2.26580

H -1.64798 -2.27990 -1.67926

H -4.00902 1.00162 -0.62514

H -3.04219 2.50060 -0.61174

H -2.75497 1.27565 -1.87338

H -2.13215 2.23818 1.67722

H -3.23591 0.85051 1.89881

H -1.48884 0.67383 2.24410

IPrCuOCH2N(iPr)BPin

SCF (BP86) Energy = -2056.43692037

Enthalpy 0K = -2055.771685

Enthalpy 298K = -2055.770741

Free Energy 298K = -2055.917590

Lowest Frequency = 5.1528 cm-1

Second Frequency = 11.5302 cm-1

SCF (BP86-D3BJ) Energy = -

2056.91600028

SCF (C6H6) Energy = -2056.69367200

SCF (BS2) Energy = -2057.14678472

SCF (PBE0-D3BJ-BS2-C6H6) Energy = -

2054.920299

SCF (wB97XD-BS2-C6H6) Energy = -

2056.536902

N 2.35651 -2.32979 -0.81367

C 2.09174 -3.60246 -0.10440

H 1.07864 -3.90290 -0.42943

C 2.04277 -3.41282 1.42178

H 3.01686 -3.06786 1.80517

H 1.78802 -4.36407 1.92266

H 1.27649 -2.66443 1.68559

C 3.09603 -4.69817 -0.51494

H 3.09806 -4.83462 -1.61019

H 2.83874 -5.66779 -0.05166

H 4.11625 -4.42225 -0.19876

B 3.51356 -1.54035 -0.60914

O 4.54639 -1.86773 0.28800

O 3.77185 -0.34312 -1.29820

C 5.43258 -0.71328 0.34971

C 5.16468 -0.00933 -1.04182

C 6.86554 -1.21483 0.56010

C 4.98810 0.14546 1.54888

C 5.30611 1.51659 -1.03360

C 5.99915 -0.61496 -2.18728

H 7.58359 -0.37637 0.54670

H 6.94475 -1.71418 1.54021

H 7.15676 -1.94051 -0.21401

H 5.66514 1.00129 1.71392

H 3.96546 0.52972 1.40184

H 4.99395 -0.48022 2.45653

H 6.33276 1.81660 -0.75958

H 5.09354 1.91426 -2.04008

H 4.59852 1.98062 -0.33011

H 5.60927 -0.24058 -3.14789

H 7.06486 -0.33874 -2.11319

H 5.92121 -1.71465 -2.19320

O 0.09472 -1.93325 -1.56342

Cu -0.68701 -0.59181 -0.64661

C -1.77614 0.66345 0.16879

N -3.14136 0.54089 0.35807

N -1.50129 1.93100 0.64581

C -3.68860 1.69106 0.92866

C -3.91235 -0.63841 0.01884

C -2.65498 2.56772 1.11050

C -0.18922 2.54322 0.67736

H -4.74931 1.77496 1.14839

C -4.15012 -1.60389 1.02909

C -4.41264 -0.77163 -1.30046

H -2.62916 3.57379 1.51970

C 0.26741 3.23747 -0.47062

C 0.56666 2.45829 1.87323

C -4.92706 -2.72641 0.68358

C -3.57420 -1.48306 2.43971

C -5.18216 -1.91571 -1.58816

C -4.13828 0.25432 -2.39904

C 1.52668 3.86298 -0.38985

C -0.53950 3.31327 -1.76611  
 C 1.81535 3.10940 1.89873  
 C 0.07966 1.69647 3.10564  
 H -5.12356 -3.49331 1.44027  
 C -5.44108 -2.88222 -0.60929  
 H -3.04122 -0.51882 2.50923  
 C -2.53936 -2.60040 2.70587  
 C -4.68384 -1.47739 3.51496  
 H -5.57857 -2.05042 -2.60003  
 H -3.52544 1.06254 -1.96351  
 C -3.31902 -0.37305 -3.55037  
 C -5.44710 0.89050 -2.91978  
 H 1.91131 4.40231 -1.26166  
 C 2.29147 3.80725 0.78170  
 H -1.51771 2.83490 -1.58506  
 C 0.15815 2.51984 -2.89470  
 C -0.80966 4.77465 -2.18937  
 H 2.42237 3.06560 2.80916  
 H -0.89122 1.23397 2.85716  
 C 1.04996 0.55327 3.47834  
 C -0.14863 2.64754 4.30276  
 H -6.04065 -3.76454 -0.85687  
 H -3.00856 -3.59891 2.66278  
 H -2.09336 -2.48126 3.70866  
 H -1.72846 -2.57523 1.95925  
 H -5.24519 -2.42790 3.52309  
 H -5.40863 -0.66270 3.34645  
 H -4.24483 -1.34346 4.51875  
 H -2.36897 -0.79413 -3.17983  
 H -3.08841 0.38999 -4.31426  
 H -3.88071 -1.18390 -4.04677  
 H -6.10276 0.13713 -3.39039  
 H -5.22403 1.65836 -3.68070  
 H -6.01816 1.36980 -2.10630  
 H 3.26362 4.30967 0.82420  
 H -0.44306 2.55915 -3.81976  
 H 0.28836 1.46146 -2.61118  
 H 1.15492 2.93742 -3.12041  
 H 0.12642 5.30955 -2.42673  
 H -1.32631 5.33940 -1.39471  
 H -1.44179 4.79905 -3.09374  
 H 1.19461 -0.13922 2.63311  
 H 0.65370 -0.02193 4.33307  
 H 2.04076 0.94292 3.77037  
 H 0.79153 3.13745 4.61113  
 H -0.53418 2.08736 5.17219  
 H -0.87446 3.44184 4.05835  
 C 1.43417 -2.04930 -1.93602  
 H 1.83423 -1.15142 -2.44689  
 H 1.50512 -2.90513 -2.65050

TS (IPrCuH)

SCF (BP86) Energy = -2716.25125080  
 Enthalpy 0K = -2715.059515  
 Enthalpy 298K = -2715.058570  
 Free Energy 298K = -2715.246531  
 Lowest Frequency = -11.6355 cm<sup>-1</sup>  
 Second Frequency = 4.8322 cm<sup>-1</sup>  
 SCF (BP86-D3BJ) Energy = -  
 2716.57217075  
 SCF (C6H6) Energy = -2716.26289990

SCF (BS2) Energy = -2716.80750050  
 SCF (PBE0-D3BJ-BS2-C6H6) Energy = -  
 2713.862944  
 SCF (wB97XD-BS2-C6H6) Energy = -  
 2715.944736

Cu 2.13594 0.00035 -0.94335  
 Cu -2.13411 0.00008 0.94051  
 N 4.29088 -1.08398 0.79313  
 N 4.29310 1.07976 0.79330  
 N -4.29372 -1.07994 -0.79262  
 N -4.29189 1.08379 -0.79292  
 C 3.59589 -0.00135 0.29048  
 C 5.37790 -0.68730 1.57481  
 H 6.03830 -1.40660 2.05131  
 C 5.37930 0.68075 1.57493  
 H 6.04115 1.39861 2.05157  
 C 3.92878 -2.46766 0.55931  
 C 4.37110 -3.09732 -0.63095  
 C 4.01386 -4.44633 -0.82116  
 H 4.33435 -4.95899 -1.73438  
 C 3.25802 -5.13834 0.13272  
 H 2.99223 -6.18746 -0.03605  
 C 2.84021 -4.49043 1.30105  
 H 2.24570 -5.03672 2.04080  
 C 3.16192 -3.14058 1.54343  
 C 5.19903 -2.37521 -1.69356  
 H 5.40667 -1.35499 -1.32706  
 C 4.40565 -2.23453 -3.01245  
 H 4.15435 -3.22322 -3.43592  
 H 5.00334 -1.68860 -3.76350  
 H 3.46409 -1.68097 -2.84752  
 C 6.55927 -3.07189 -1.92390  
 H 7.13973 -3.14928 -0.98869  
 H 7.16087 -2.50449 -2.65515  
 H 6.42973 -4.09317 -2.32298  
 C 2.69597 -2.46942 2.83560  
 H 2.98793 -1.40592 2.79240  
 C 1.15970 -2.51465 2.98948  
 H 0.64865 -1.99131 2.16518  
 H 0.86019 -2.01937 3.92906  
 H 0.78645 -3.55346 3.02754  
 C 3.39937 -3.09580 4.06294  
 H 3.13609 -4.16258 4.17330  
 H 3.09205 -2.57771 4.98785  
 H 4.49842 -3.03070 3.98244  
 C 3.93378 2.46421 0.55971  
 C 4.37794 3.09337 -0.63013  
 C 4.02340 4.44312 -0.82012  
 H 4.34536 4.95545 -1.73302  
 C 3.26833 5.13629 0.13353  
 H 3.00463 6.18596 -0.03508  
 C 2.84860 4.48882 1.30142  
 H 2.25467 5.03601 2.04097  
 C 3.16764 3.13830 1.54359  
 C 5.20489 2.36990 -1.69258  
 H 5.41050 1.34923 -1.32618  
 C 4.41164 2.23094 -3.01173  
 H 3.46898 1.67914 -2.84718  
 H 5.00852 1.68401 -3.76270  
 H 4.16233 3.22017 -3.43511  
 C 6.56650 3.06406 -1.92239  
 H 6.43901 4.08565 -2.32134  
 H 7.16726 2.49565 -2.65354



|   |          |          |          |
|---|----------|----------|----------|
| H | 7.14681  | 3.14021  | -0.98698 |
| C | 2.69930  | 2.46756  | 2.83510  |
| H | 2.99074  | 1.40389  | 2.79252  |
| C | 1.16277  | 2.51371  | 2.98625  |
| H | 0.86121  | 2.01864  | 3.92529  |
| H | 0.65290  | 1.99068  | 2.16103  |
| H | 0.79016  | 3.55278  | 3.02350  |
| C | 3.40094  | 3.09360  | 4.06360  |
| H | 4.50009  | 3.02798  | 3.98491  |
| H | 3.09183  | 2.57563  | 4.98799  |
| H | 3.13798  | 4.16050  | 4.17361  |
| C | -3.59614 | 0.00141  | -0.29083 |
| C | -5.38084 | -0.68130 | -1.57315 |
| H | -6.04307 | -1.39940 | -2.04891 |
| C | -5.37969 | 0.68675  | -1.57333 |
| H | -6.04074 | 1.40582  | -2.04927 |
| C | -3.93395 | -2.46426 | -0.55896 |
| C | -4.37734 | -3.09328 | 0.63124  |
| C | -4.02238 | -4.44291 | 0.82133  |
| H | -4.34373 | -4.95512 | 1.73450  |
| C | -3.26762 | -5.13608 | -0.13257 |
| H | -3.00357 | -6.18565 | 0.03612  |
| C | -2.84861 | -4.48874 | -1.30079 |
| H | -2.25487 | -5.03592 | -2.04051 |
| C | -3.16812 | -3.13835 | -1.54308 |
| C | -5.20368 | -2.36967 | 1.69405  |
| H | -5.41019 | -1.34932 | 1.32728  |
| C | -4.40918 | -2.22958 | 3.01234  |
| H | -4.15902 | -3.21846 | 3.43601  |
| H | -5.00555 | -1.68247 | 3.76359  |
| H | -3.46692 | -1.67750 | 2.84652  |
| C | -6.56471 | -3.06437 | 1.92562  |
| H | -6.43635 | -4.08563 | 2.32512  |
| H | -7.14589 | -3.14142 | 0.99082  |
| H | -7.16505 | -2.49579 | 2.65698  |
| C | -2.70039 | -2.46768 | -2.83485 |
| H | -2.99286 | -1.40428 | -2.79270 |
| C | -1.16379 | -2.51245 | -2.98572 |
| H | -0.65458 | -1.98877 | -2.16051 |
| H | -0.86248 | -2.01735 | -3.92482 |
| H | -0.79021 | -3.55118 | -3.02259 |
| C | -3.40130 | -3.09484 | -4.06319 |
| H | -3.13730 | -4.16151 | -4.17283 |
| H | -3.09258 | -2.57688 | -4.98771 |
| H | -4.50052 | -3.03023 | -3.98462 |
| C | -3.92989 | 2.46759  | -0.55965 |
| C | -3.16352 | 3.14038  | -1.54424 |
| C | -2.84190 | 4.49033  | -1.30233 |
| H | -2.24773 | 5.03652  | -2.04244 |
| C | -3.25936 | 5.13848  | -0.13400 |
| H | -2.99365 | 6.18768  | 0.03440  |
| C | -4.01470 | 4.44659  | 0.82037  |
| H | -4.33486 | 4.95944  | 1.73361  |
| C | -4.37179 | 3.09748  | 0.63065  |
| C | -5.19888 | 2.37535  | 1.69390  |
| H | -5.40707 | 1.35524  | 1.32742  |
| C | -4.40420 | 2.23433  | 3.01197  |
| H | -3.46286 | 1.68072  | 2.84599  |
| H | -5.00119 | 1.68833  | 3.76353  |
| H | -4.15237 | 3.22291  | 3.43534  |
| C | -6.55878 | 3.07220  | 1.92573  |
| H | -6.42872 | 4.09334  | 2.32497  |
| H | -7.15977 | 2.50469  | 2.65739  |
| H | -7.14012 | 3.14994  | 0.99109  |

|   |          |          |          |
|---|----------|----------|----------|
| C | -2.69766 | 2.46887  | -2.83625 |
| H | -2.99052 | 1.40561  | -2.79318 |
| C | -1.16127 | 2.51290  | -2.98932 |
| H | -0.86155 | 2.01717  | -3.92860 |
| H | -0.65101 | 1.98946  | -2.16460 |
| H | -0.78727 | 3.55144  | -3.02737 |
| C | -3.39996 | 3.09577  | -4.06395 |
| H | -3.13573 | 4.16231  | -4.17430 |
| H | -4.49910 | 3.03159  | -3.98394 |
| H | -3.09264 | 2.57735  | -4.98867 |
| H | 1.06398  | 0.00110  | -2.01763 |
| H | -1.05968 | -0.00106 | 2.01230  |

TS(IPrCuH2BPin)

SCF (BP86) Energy = -1769.98281982

Enthalpy 0K = -1769.191836

Enthalpy 298K = -1769.190892

Free Energy 298K = -1769.319596

Lowest Frequency = -101.0561 cm-1

Second Frequency = 6.5093 cm-1

SCF (BP86-D3BJ) Energy = -

1770.18380180

SCF (C6H6) Energy = -1769.98974857

SCF (BS2) Energy = -1770.36734105

SCF (PBE0-D3BJ-BS2-C6H6) Energy = -

1768.44492

SCF (wB97XD-BS2-C6H6) Energy = -

1769.829541

|    |          |          |          |
|----|----------|----------|----------|
| Cu | -0.35310 | 0.33736  | -0.74979 |
| N  | 1.22664  | -1.80723 | 0.53494  |
| N  | 2.34825  | 0.04327  | 0.47036  |
| C  | 1.11860  | -0.48957 | 0.13920  |
| C  | 2.47950  | -2.08119 | 1.08855  |
| H  | 2.74455  | -3.07028 | 1.45176  |
| C  | 3.18904  | -0.91251 | 1.04634  |
| H  | 4.19995  | -0.67337 | 1.36469  |
| C  | 0.17943  | -2.79800 | 0.38253  |
| C  | 0.13492  | -3.55753 | -0.81309 |
| C  | -0.86490 | -4.54397 | -0.91662 |
| H  | -0.92979 | -5.14370 | -1.83066 |
| C  | -1.77639 | -4.76502 | 0.12266  |
| H  | -2.54404 | -5.53960 | 0.02145  |
| C  | -1.71455 | -3.99018 | 1.28696  |
| H  | -2.43933 | -4.16074 | 2.08976  |
| C  | -0.74136 | -2.98423 | 1.44369  |
| C  | 1.09835  | -3.32642 | -1.97655 |
| H  | 1.81887  | -2.54758 | -1.67185 |
| C  | 0.34235  | -2.79089 | -3.21440 |
| H  | -0.39739 | -3.52525 | -3.57942 |
| H  | 1.05003  | -2.58909 | -4.03759 |
| H  | -0.18982 | -1.85442 | -2.97452 |
| C  | 1.90496  | -4.60040 | -2.31408 |
| H  | 1.24692  | -5.41806 | -2.65672 |
| H  | 2.46864  | -4.96875 | -1.43988 |
| H  | 2.62555  | -4.39401 | -3.12433 |
| C  | -0.70407 | -2.15094 | 2.72431  |
| H  | 0.02163  | -1.33299 | 2.57320  |
| C  | -2.07223 | -1.49859 | 3.02478  |
| H  | -2.43464 | -0.90138 | 2.17192  |
| H  | -1.98798 | -0.83630 | 3.90404  |
| H  | -2.83908 | -2.25792 | 3.26005  |
| C  | -0.21471 | -2.99840 | 3.92194  |

H -0.90194 -3.83992 4.11977  
H -0.16437 -2.38292 4.83704  
H 0.78794 -3.42161 3.73914  
C 2.72184 1.42708 0.25963  
C 2.60217 2.33281 1.34387  
C 2.99733 3.66624 1.12213  
H 2.91647 4.39019 1.93986  
C 3.47997 4.08163 -0.12463  
H 3.77616 5.12495 -0.27658  
C 3.57899 3.16589 -1.17866  
H 3.95068 3.50028 -2.15295  
C 3.20700 1.81728 -1.01378  
C 3.33241 0.84743 -2.18826  
H 3.02004 -0.15199 -1.83932  
C 2.38184 1.24543 -3.34028  
H 1.33226 1.25583 -2.99802  
H 2.46657 0.52382 -4.17156  
H 2.62809 2.24627 -3.73699  
C 4.79511 0.73583 -2.67531  
H 5.16555 1.69839 -3.06930  
H 4.87161 -0.00647 -3.48860  
H 5.47239 0.42416 -1.86181  
C 2.07121 1.91568 2.71564  
H 1.74660 0.86281 2.64903  
C 0.83736 2.75021 3.12640  
H 0.44158 2.39402 4.09339  
H 0.03505 2.67184 2.37467  
H 1.09049 3.81830 3.24463  
C 3.17974 1.99548 3.79075  
H 3.54463 3.03048 3.91229  
H 4.04666 1.36514 3.52868  
H 2.79487 1.65839 4.76889  
H -1.32803 0.75478 -1.84954  
C -4.06653 2.53019 -1.06371  
C -4.57227 1.27135 -0.23719  
B -2.29270 1.51378 -0.04237  
O -3.32974 0.59051 0.12495  
O -2.72440 2.74680 -0.52272  
C -5.25988 1.65247 1.08726  
H -6.24581 2.11883 0.91996  
H -5.40652 0.74028 1.68874  
H -4.63523 2.34872 1.67029  
C -5.44785 0.29190 -1.02672  
H -6.38031 0.77787 -1.36363  
H -4.91620 -0.10139 -1.90569  
H -5.72207 -0.56097 -0.38353  
C -3.91545 2.25163 -2.56973  
H -4.89377 2.10164 -3.05710  
H -3.42173 3.11680 -3.04225  
H -3.28122 1.36780 -2.74546  
C -4.87786 3.81220 -0.84303  
H -4.42927 4.63480 -1.42417  
H -5.91972 3.68305 -1.18470  
H -4.88859 4.11135 0.21594  
H -1.27915 1.43750 0.64423

TS1

SCF (BP86) Energy = -1644.20066543  
Enthalpy 0K = -1644.030566  
Enthalpy 298K = -1644.029622  
Free Energy 298K = -1644.151766  
Lowest Frequency = -69.5115 cm-1  
Second Frequency = 14.3400 cm-1

SCF (BP86-D3BJ) Energy = -  
1644.92414479  
SCF (C6H6) Energy = -1644.74488005  
SCF (BS2) Energy = -1645.09773320  
SCF (PBE0-D3BJ-BS2-C6H6) Energy = -  
1643.300945  
SCF (wB97XD-BS2-C6H6) Energy = -  
1644.572123

N -0.60561 1.03435 -3.01291  
C -1.38001 2.31126 -3.05867  
H -1.34653 2.70875 -4.09157  
C -2.83998 2.02567 -2.67921  
H -2.89510 1.57409 -1.67433  
H -3.42661 2.96085 -2.67966  
H -3.30442 1.32602 -3.39331  
C -0.70863 3.31460 -2.11666  
H 0.31670 3.54191 -2.45016  
H -1.28229 4.25644 -2.08431  
H -0.65232 2.89478 -1.09789  
C -0.32621 0.34710 -4.01407  
O -0.07853 -0.23209 -5.02012  
Cu 0.13283 -0.41726 -1.49045  
N 1.31999 -0.17318 1.18161  
N -0.82319 -0.46442 1.33999  
C 0.16916 -0.19610 0.40457  
C 1.05061 -0.44066 2.52649  
H 1.83756 -0.47973 3.27465  
C -0.29855 -0.62773 2.62690  
H -0.92777 -0.86433 3.48029  
C 2.65716 0.03748 0.66711  
C 3.17530 1.35781 0.63957  
C 4.49624 1.52944 0.18313  
H 4.92714 2.53522 0.15207  
C 5.26625 0.43556 -0.23173  
H 6.29122 0.59152 -0.58504  
C 4.72755 -0.85546 -0.19673  
H 5.33562 -1.70474 -0.52497  
C 3.41262 -1.08840 0.25255  
C 2.36317 2.55770 1.12861  
H 1.29883 2.26272 1.11953  
C 2.50651 3.79045 0.21179  
H 3.52523 4.21477 0.24632  
H 1.81346 4.58598 0.53564  
H 2.27829 3.53967 -0.83675  
C 2.74258 2.91838 2.58507  
H 3.80845 3.19913 2.65364  
H 2.57345 2.07132 3.27074  
H 2.14209 3.77240 2.94489  
C 2.87202 -2.51651 0.31952  
H 1.79176 -2.45717 0.53682  
C 3.01673 -3.25860 -1.02609  
H 2.46692 -2.72420 -1.81852  
H 2.59380 -4.27485 -0.93948  
H 4.07397 -3.36667 -1.32700  
C 3.54954 -3.29787 1.47037  
H 4.63705 -3.39171 1.30170  
H 3.13120 -4.31694 1.54245  
H 3.40459 -2.79957 2.44465  
C -2.23646 -0.55108 1.04349  
C -2.75197 -1.74820 0.48319  
C -4.13704 -1.79930 0.22723  
H -4.56366 -2.70996 -0.20558  
C -4.97440 -0.71822 0.52491

|   |          |          |          |
|---|----------|----------|----------|
| H | -6.04815 | -0.78409 | 0.31895  |
| C | -4.44145 | 0.44504  | 1.09404  |
| H | -5.10533 | 1.28205  | 1.33431  |
| C | -3.06372 | 0.55822  | 1.36482  |
| C | -2.51897 | 1.82371  | 2.03166  |
| H | -1.41819 | 1.80116  | 1.94860  |
| C | -3.00775 | 3.11959  | 1.34968  |
| H | -2.76730 | 3.12709  | 0.27466  |
| H | -2.52640 | 3.99695  | 1.81535  |
| H | -4.09866 | 3.25304  | 1.45395  |
| C | -2.87821 | 1.84505  | 3.53707  |
| H | -3.97319 | 1.86346  | 3.67869  |
| H | -2.45756 | 2.74166  | 4.02492  |
| H | -2.48953 | 0.95749  | 4.06345  |
| C | -1.88608 | -2.98290 | 0.22956  |
| H | -0.82862 | -2.67854 | 0.30921  |
| C | -2.07303 | -3.56024 | -1.18883 |
| H | -1.42346 | -4.44257 | -1.32010 |
| H | -1.78237 | -2.81920 | -1.95157 |
| H | -3.11260 | -3.88438 | -1.37399 |
| C | -2.16172 | -4.05333 | 1.31310  |
| H | -3.20874 | -4.40284 | 1.27119  |
| H | -1.98015 | -3.66144 | 2.32876  |
| H | -1.50722 | -4.92932 | 1.16238  |
| H | 0.48908  | -1.52094 | -2.52507 |

TS2

SCF (BP86) Energy = -2056.63804994  
 Enthalpy 0K = -2055.735626  
 Enthalpy 298K = -2055.734682  
 Free Energy 298K = -2055.877864  
 Lowest Frequency = -143.8098 cm-1  
 Second Frequency = 9.0158 cm-1  
 SCF (BP86-D3BJ) Energy = -  
 2056.88981527  
 SCF (C6H6) Energy = -2056.65324295  
 SCF (BS2) Energy = -2057.10571094  
 SCF (PBE0-D3BJ-BS2-C6H6) Energy = -  
 2054.887744  
 SCF (wB97XD-BS2-C6H6) Energy = -  
 2056.504248

|   |          |          |          |
|---|----------|----------|----------|
| O | -1.33587 | -3.94429 | 0.98756  |
| N | -1.11464 | -2.06583 | -0.41596 |
| C | -0.82371 | -2.96867 | -1.57627 |
| H | -1.63110 | -3.72458 | -1.60802 |
| C | 0.51603  | -3.70744 | -1.39609 |
| H | 1.35089  | -2.98397 | -1.33525 |
| H | 0.70341  | -4.37123 | -2.25918 |
| H | 0.50510  | -4.31723 | -0.48156 |
| C | -0.82881 | -2.17558 | -2.89113 |
| H | -1.81452 | -1.73234 | -3.09273 |
| H | -0.56016 | -2.84207 | -3.72939 |
| H | -0.07689 | -1.36204 | -2.85668 |
| C | -1.31441 | -2.72031 | 0.79696  |
| H | -1.50444 | -1.99930 | 1.62599  |
| C | -4.55099 | -0.83647 | 0.50294  |
| C | -4.65385 | -1.70802 | -0.82279 |
| B | -2.55448 | -0.71037 | -0.69780 |
| O | -3.51128 | -1.25167 | -1.59409 |
| O | -3.13500 | -0.52507 | 0.59552  |
| C | -4.52548 | -3.22592 | -0.58358 |
| H | -4.43508 | -3.72775 | -1.56173 |

|    |          |          |          |
|----|----------|----------|----------|
| H  | -3.63998 | -3.49108 | 0.01360  |
| H  | -5.41848 | -3.63157 | -0.07680 |
| C  | -5.91324 | -1.44179 | -1.66257 |
| H  | -6.82811 | -1.70385 | -1.10260 |
| H  | -5.97834 | -0.38838 | -1.97346 |
| H  | -5.88449 | -2.06265 | -2.57369 |
| C  | -5.29752 | 0.50918  | 0.39795  |
| H  | -6.39351 | 0.37888  | 0.38262  |
| H  | -5.03480 | 1.12843  | 1.27155  |
| H  | -4.99312 | 1.05695  | -0.50850 |
| C  | -4.97868 | -1.57016 | 1.78161  |
| H  | -4.84745 | -0.90621 | 2.65296  |
| H  | -6.04342 | -1.85939 | 1.73514  |
| H  | -4.37656 | -2.47589 | 1.94861  |
| H  | -1.84572 | 0.18193  | -1.15045 |
| Cu | 0.06959  | -0.53542 | -0.19233 |
| C  | 1.31930  | 0.80907  | 0.18378  |
| N  | 1.11888  | 2.16197  | 0.36103  |
| N  | 2.66863  | 0.64717  | 0.42500  |
| C  | -0.14795 | 2.85447  | 0.20841  |
| C  | 2.30316  | 2.81430  | 0.70347  |
| C  | 3.38051  | -0.61464 | 0.35063  |
| C  | 3.28169  | 1.85860  | 0.74353  |
| C  | -0.99468 | 2.97817  | 1.33765  |
| C  | -0.46039 | 3.41727  | -1.05361 |
| H  | 2.33642  | 3.88546  | 0.88140  |
| C  | 3.41370  | -1.44790 | 1.49710  |
| C  | 4.04633  | -0.94176 | -0.85744 |
| H  | 4.34321  | 1.92492  | 0.96471  |
| C  | -2.18058 | 3.71989  | 1.17488  |
| C  | -0.65943 | 2.35974  | 2.69433  |
| C  | -1.66241 | 4.14357  | -1.15698 |
| C  | 0.43874  | 3.25886  | -2.27946 |
| C  | 4.15253  | -2.64337 | 1.40349  |
| C  | 2.71829  | -1.07974 | 2.80751  |
| C  | 4.77074  | -2.14927 | -0.89015 |
| C  | 4.01731  | -0.03645 | -2.08936 |
| H  | -2.85737 | 3.83570  | 2.02729  |
| C  | -2.51135 | 4.30039  | -0.05522 |
| H  | 0.19361  | 1.67349  | 2.55034  |
| C  | -1.83202 | 1.52029  | 3.24896  |
| C  | -0.22136 | 3.44689  | 3.70369  |
| H  | -1.93606 | 4.58838  | -2.11948 |
| H  | 1.30362  | 2.63628  | -1.99076 |
| C  | -0.29787 | 2.51934  | -3.41933 |
| C  | 0.98702  | 4.62244  | -2.75842 |
| H  | 4.19710  | -3.31159 | 2.26933  |
| C  | 4.82550  | -2.99199 | 0.22640  |
| H  | 2.05837  | -0.21721 | 2.60947  |
| C  | 1.82684  | -2.22389 | 3.33752  |
| C  | 3.75450  | -0.64499 | 3.87107  |
| H  | 5.29648  | -2.43229 | -1.80799 |
| H  | 3.30125  | 0.78095  | -1.89415 |
| C  | 3.52270  | -0.78711 | -3.34549 |
| C  | 5.40301  | 0.60422  | -2.33767 |
| H  | -3.44044 | 4.87078  | -0.15798 |
| H  | -2.68795 | 2.15998  | 3.52908  |
| H  | -1.51367 | 0.98716  | 4.16178  |
| H  | -2.18614 | 0.78280  | 2.50896  |
| H  | 0.65675  | 4.01016  | 3.34345  |
| H  | 0.03992  | 2.99058  | 4.67428  |
| H  | -1.03505 | 4.17219  | 3.88041  |
| H  | -0.67609 | 1.54117  | -3.07965 |
| H  | 0.38284  | 2.35571  | -4.27286 |

|   |          |          |          |
|---|----------|----------|----------|
| H | -1.15955 | 3.10311  | -3.78728 |
| H | 0.17045  | 5.29419  | -3.07571 |
| H | 1.66108  | 4.48556  | -3.62174 |
| H | 1.55126  | 5.13624  | -1.96143 |
| H | 5.39240  | -3.92755 | 0.17789  |
| H | 1.08861  | -2.54600 | 2.58562  |
| H | 1.27986  | -1.89028 | 4.23599  |
| H | 2.42242  | -3.10722 | 3.62673  |
| H | 4.44769  | -1.47091 | 4.10891  |
| H | 3.24761  | -0.35000 | 4.80613  |
| H | 4.35928  | 0.21073  | 3.52524  |
| H | 4.21512  | -1.59614 | -3.63615 |
| H | 3.44968  | -0.09233 | -4.19986 |
| H | 2.52976  | -1.23603 | -3.17996 |
| H | 5.74387  | 1.18759  | -1.46542 |
| H | 5.36633  | 1.28128  | -3.20864 |
| H | 6.16629  | -0.16688 | -2.54211 |

TS3

SCF (BP86) Energy = -2055.92314629  
 Enthalpy 0K = -2055.739681  
 Enthalpy 298K = -2055.738737  
 Free Energy 298K = -2055.882225  
 Lowest Frequency = -599.9324 cm-1  
 Second Frequency = 10.0061 cm-1  
 SCF (BP86-D3BJ) Energy = -  
 2056.87865173  
 SCF (C6H6) Energy = -2056.65465150  
 SCF (BS2) Energy = -2057.10946799  
 SCF (PBE0-D3BJ-BS2-C6H6) Energy = -  
 2054.876036  
 SCF (wB97XD-BS2-C6H6) Energy = -  
 2056.489185

|   |          |          |          |
|---|----------|----------|----------|
| O | -0.86388 | 0.09883  | 1.86826  |
| N | -2.91318 | -0.46774 | 0.81910  |
| C | -2.66043 | -1.92343 | 0.96147  |
| H | -1.61875 | -1.98903 | 1.31999  |
| C | -2.77046 | -2.64323 | -0.39491 |
| H | -3.80423 | -2.60485 | -0.77691 |
| H | -2.47481 | -3.70206 | -0.29339 |
| H | -2.10376 | -2.17274 | -1.13707 |
| C | -3.56915 | -2.54615 | 2.03506  |
| H | -3.43298 | -2.03238 | 3.00099  |
| H | -3.32188 | -3.61354 | 2.17263  |
| H | -4.62962 | -2.47272 | 1.74297  |
| C | -1.80231 | 0.41487  | 1.00774  |
| H | -2.14334 | 1.46397  | 0.94525  |
| B | -4.16233 | 0.07370  | 0.37469  |
| O | -5.27500 | -0.70150 | 0.04552  |
| O | -4.38931 | 1.44376  | 0.24225  |
| C | -6.39773 | 0.22696  | -0.09670 |
| C | -5.66823 | 1.58645  | -0.45098 |
| C | -7.12278 | 0.26909  | 1.26058  |
| C | -7.33195 | -0.31207 | -1.18417 |
| C | -5.35457 | 1.72832  | -1.95160 |
| C | -6.36031 | 2.84932  | 0.07126  |
| H | -8.03053 | 0.89447  | 1.22010  |
| H | -7.42046 | -0.75472 | 1.53976  |
| H | -6.46208 | 0.66068  | 2.05135  |
| H | -8.16393 | 0.38907  | -1.36965 |
| H | -6.79656 | -0.48156 | -2.13024 |
| H | -7.76392 | -1.27336 | -0.86014 |

|   |          |          |          |
|---|----------|----------|----------|
| H | -6.26540 | 1.91717  | -2.54463 |
| H | -4.66557 | 2.57665  | -2.09314 |
| H | -4.86268 | 0.82191  | -2.34115 |
| H | -5.76361 | 3.73673  | -0.19691 |
| H | -7.36148 | 2.96351  | -0.37919 |
| H | -6.46605 | 2.82969  | 1.16619  |
| N | 3.04772  | 1.01004  | -0.15294 |
| N | 2.83977  | -1.13944 | -0.36386 |
| C | 2.09766  | 0.00498  | -0.13829 |
| C | 4.33064  | 0.50355  | -0.38070 |
| H | 5.20370  | 1.14869  | -0.42564 |
| C | 4.19999  | -0.85091 | -0.51388 |
| H | 4.93560  | -1.62889 | -0.69844 |
| C | 2.74159  | 2.41041  | 0.04714  |
| C | 2.71742  | 2.92041  | 1.36952  |
| C | 2.42318  | 4.28887  | 1.52998  |
| H | 2.39301  | 4.71228  | 2.53952  |
| C | 2.16360  | 5.11039  | 0.42665  |
| H | 1.93540  | 6.17115  | 0.57621  |
| C | 2.18966  | 4.57654  | -0.86764 |
| H | 1.97559  | 5.22382  | -1.72479 |
| C | 2.47761  | 3.21597  | -1.08933 |
| C | 2.98820  | 2.05288  | 2.59832  |
| H | 3.20492  | 1.02847  | 2.24910  |
| C | 1.74450  | 1.97260  | 3.51342  |
| H | 1.46411  | 2.97118  | 3.89370  |
| H | 1.96045  | 1.33369  | 4.38778  |
| H | 0.87733  | 1.54481  | 2.98168  |
| C | 4.22883  | 2.55212  | 3.37414  |
| H | 4.07097  | 3.56780  | 3.77751  |
| H | 5.12633  | 2.58276  | 2.73265  |
| H | 4.44004  | 1.88530  | 4.22803  |
| C | 2.46543  | 2.65637  | -2.51159 |
| H | 2.78380  | 1.60058  | -2.46376 |
| C | 1.03365  | 2.67681  | -3.09515 |
| H | 0.34492  | 2.09170  | -2.46198 |
| H | 1.02675  | 2.24383  | -4.11096 |
| H | 0.64633  | 3.70870  | -3.16591 |
| C | 3.46001  | 3.39993  | -3.43091 |
| H | 4.48740  | 3.36638  | -3.02982 |
| H | 3.18374  | 4.46163  | -3.55492 |
| H | 3.46894  | 2.94172  | -4.43510 |
| C | 2.27246  | -2.46893 | -0.41957 |
| C | 1.87542  | -2.98507 | -1.67881 |
| C | 1.32457  | -4.28095 | -1.70433 |
| H | 1.00226  | -4.70601 | -2.66084 |
| C | 1.17575  | -5.02837 | -0.52944 |
| H | 0.74315  | -6.03369 | -0.57222 |
| C | 1.57740  | -4.49189 | 0.69986  |
| H | 1.45465  | -5.08181 | 1.61440  |
| C | 2.13575  | -3.20124 | 0.78650  |
| C | 2.56830  | -2.64845 | 2.14439  |
| H | 2.99275  | -1.64278 | 1.98118  |
| C | 1.36373  | -2.48898 | 3.10011  |
| H | 0.60944  | -1.79699 | 2.68882  |
| H | 1.70304  | -2.08763 | 4.07122  |
| H | 0.87759  | -3.46154 | 3.29536  |
| C | 3.67609  | -3.52278 | 2.77624  |
| H | 3.31168  | -4.54216 | 2.99367  |
| H | 4.01459  | -3.08119 | 3.72951  |
| H | 4.55174  | -3.61539 | 2.11105  |
| C | 2.00372  | -2.18386 | -2.97425 |
| H | 2.52811  | -1.24150 | -2.73935 |
| C | 0.61089  | -1.80653 | -3.52906 |

H 0.71394 -1.21000 -4.45255  
H 0.04442 -1.21061 -2.79345  
H 0.02082 -2.70740 -3.77381  
C 2.84627 -2.93262 -4.03113  
H 2.36253 -3.87405 -4.34511  
H 3.84972 -3.18395 -3.64729  
H 2.97062 -2.30866 -4.93311  
Cu 0.26736 0.19548 0.13693  
H -1.19151 0.47877 -0.48759

4-NC-C<sub>6</sub>H<sub>4</sub>NCO

SCF (BP86) Energy = -491.975054717  
Enthalpy 0K = -491.866583  
Enthalpy 298K = -491.865639  
Free Energy 298K = -491.910933  
Lowest Frequency = 51.1656 cm<sup>-1</sup>  
Second Frequency = 79.5687 cm<sup>-1</sup>  
SCF (BP86-D3BJ) Energy = -  
492.002313066  
SCF (C6H6) Energy = -491.978945693  
SCF (BS2) Energy = -492.112136929  
SCF (PBE0-D3BJ-BS2-C6H6) Energy = -  
491.5484609  
SCF (wB97XD-BS2-C6H6) Energy = -  
491.9228459

N -2.27477 -0.55726 -0.00000  
C -3.31560 0.08875 -0.00000  
O -4.40226 0.56807 0.00001  
C -0.89904 -0.32153 -0.00000  
C -0.03658 -1.43892 -0.00000  
C -0.35878 0.98553 -0.00000  
C 1.34739 -1.25557 0.00000  
H -0.46919 -2.44273 0.00000  
C 1.02451 1.16879 -0.00000  
H -1.03015 1.84976 -0.00000  
C 1.89296 0.05035 -0.00000  
H 2.01710 -2.11974 0.00000  
H 1.44482 2.17824 -0.00000  
C 3.31385 0.24078 0.00000  
N 4.48095 0.39737 0.00000

IPrCuN(4-NC-C<sub>6</sub>H<sub>4</sub>)C(O)H

SCF (BP86) Energy = -1850.16285784  
Enthalpy 0K = -1849.452116  
Enthalpy 298K = -1849.451172  
Free Energy 298K = -1849.580881  
Lowest Frequency = 7.2732 cm<sup>-1</sup>  
Second Frequency = 9.7734 cm<sup>-1</sup>  
SCF (BP86-D3BJ) Energy = -  
1850.36267969  
SCF (C6H6) Energy = -1850.17391541  
SCF (BS2) Energy = -1850.57684583  
SCF (PBE0-D3BJ-BS2-C6H6) Energy = -  
1848.56064  
SCF (wB97XD-BS2-C6H6) Energy = -  
1849.971959

Cu -0.01696 -0.78281 -0.19611  
O -0.73438 -4.63931 -0.92800  
N 0.66449 2.04214 0.17827  
N 2.41863 0.76874 0.24698

N -1.05390 -2.33870 -0.45631  
C 1.05186 0.72338 0.07999  
C -0.70593 2.50342 0.06160  
C -1.48115 2.63119 1.24181  
C -2.80166 3.10092 1.09851  
H -3.42815 3.21274 1.98939  
C -3.32615 3.41960 -0.16028  
H -4.35677 3.77870 -0.24779  
C -2.53669 3.27528 -1.30768  
H -2.95890 3.51846 -2.28816  
C -1.20690 2.81798 -1.22668  
C -0.93996 2.28845 2.62983  
H 0.06263 1.84368 2.50330  
C -1.82073 1.23760 3.34244  
H -2.83084 1.62918 3.55360  
H -1.36840 0.95393 4.30812  
H -1.93435 0.32609 2.73288  
C -0.78231 3.56084 3.49452  
H -0.11489 4.29792 3.01641  
H -0.36009 3.30644 4.48196  
H -1.75673 4.05177 3.66239  
C -0.37681 2.66100 -2.50050  
H 0.64461 2.36082 -2.20781  
C -0.94858 1.53777 -3.39605  
H -0.97611 0.57456 -2.85867  
H -0.32676 1.41189 -4.29916  
H -1.97632 1.77079 -3.72438  
C -0.26237 3.99283 -3.27609  
H -1.24664 4.33936 -3.63561  
H 0.38602 3.86529 -4.15987  
H 0.16605 4.79287 -2.64887  
C 3.28051 -0.39799 0.22611  
C 3.51733 -1.08704 1.44188  
C 4.36070 -2.21398 1.39064  
H 4.55878 -2.77448 2.31012  
C 4.94175 -2.63192 0.18736  
H 5.59136 -3.51313 0.17137  
C 4.68946 -1.92832 -0.99648  
H 5.14365 -2.26619 -1.93375  
C 3.85336 -0.79485 -1.00800  
C 2.88705 -0.66784 2.76979  
H 2.31264 0.25935 2.59773  
C 1.89270 -1.73976 3.27263  
H 1.09656 -1.92465 2.53152  
H 1.41915 -1.41335 4.21461  
H 2.40225 -2.69941 3.46732  
C 3.96051 -0.35519 3.83685  
H 4.55692 -1.24988 4.08608  
H 3.48318 -0.00563 4.76838  
H 4.65827 0.42762 3.49421  
C 3.58516 -0.06039 -2.32146  
H 2.93737 0.80649 -2.10235  
C 2.82296 -0.96490 -3.31685  
H 3.41811 -1.85371 -3.58919  
H 2.60090 -0.41228 -4.24604  
H 1.86970 -1.31632 -2.88751  
C 4.89039 0.48303 -2.94596  
H 5.42499 1.15295 -2.25136  
H 4.66786 1.04997 -3.86624  
H 5.57936 -0.33509 -3.21858  
C -0.33168 -3.48599 -0.73364  
H 0.76593 -3.25197 -0.77124  
C 2.86576 2.07583 0.44268  
H 3.91657 2.30754 0.59250

C 1.75850 2.87967 0.39933  
H 1.64712 3.95557 0.50097  
C -2.45670 -2.32706 -0.34720  
C -3.08197 -1.07737 -0.08096  
C -3.29635 -3.46966 -0.47979  
C -4.46234 -0.95763 0.05089  
H -2.44963 -0.18485 0.01817  
C -4.68131 -3.35082 -0.34740  
H -2.83237 -4.43391 -0.68696  
C -5.29033 -2.10053 -0.08028  
H -4.91316 0.01811 0.25422  
H -5.31158 -4.23956 -0.45134  
C -6.70995 -1.98571 0.05456  
N -7.87925 -1.88258 0.16736

PinBN(4-NC-C<sub>6</sub>H<sub>4</sub>)C(O)H  
SCF (BP86) Energy = -903.882318045  
Enthalpy 0K = -903.573438  
Enthalpy 298K = -903.572494  
Free Energy 298K = -903.641116  
Lowest Frequency = 25.1053 cm<sup>-1</sup>  
Second Frequency = 38.3683 cm<sup>-1</sup>  
SCF (BP86-D3BJ) Energy = -  
903.953531752  
SCF (C6H6) Energy = -903.888301595  
SCF (BS2) Energy = -904.123476142  
SCF (PBE0-D3BJ-BS2-C6H6) Energy = -  
903.1246805  
SCF (wB97XD-BS2-C6H6) Energy = -  
903.8447165

O 0.97174 3.46286 0.17345  
N 0.14875 1.26693 0.08942  
C 0.03651 2.67422 0.15791  
H -1.02965 2.98512 0.20313  
B -1.08773 0.48572 0.03216  
O -1.12161 -0.89216 0.00757  
O -2.32603 1.09695 -0.01711  
C -2.51381 -1.25716 -0.31641  
C -3.31795 0.02128 0.15930  
C -2.85238 -2.55098 0.42699  
C -2.56413 -1.47766 -1.83709  
C -4.54807 0.36489 -0.68354  
C -3.67638 -0.00519 1.65430  
H -3.90592 -2.83141 0.25769  
H -2.21877 -3.37131 0.05269  
H -2.68422 -2.45604 1.51000  
H -3.55743 -1.82934 -2.16136  
H -2.32505 -0.55183 -2.38574  
H -1.81914 -2.24063 -2.11378  
H -5.29448 -0.44587 -0.62996  
H -5.01778 1.28433 -0.29805  
H -4.28540 0.53236 -1.73846  
H -4.03481 0.99214 1.95558  
H -4.47300 -0.73728 1.86623  
H -2.79940 -0.25493 2.27405  
C 1.44564 0.65031 0.06430  
C 1.67921 -0.51252 0.82712  
C 2.48910 1.19471 -0.71455  
C 2.92998 -1.13422 0.80422  
H 0.87225 -0.93301 1.43085  
C 3.74416 0.58050 -0.73130  
H 2.31797 2.10179 -1.29467

C 3.97802 -0.59144 0.02531  
H 3.10658 -2.03752 1.39455  
H 4.55180 1.00232 -1.33581  
C 5.26441 -1.22505 0.00247  
N 6.31931 -1.74819 -0.01701

IPrCuOCH<sub>2</sub>N(4-NC-C<sub>6</sub>H<sub>4</sub>)BPin  
SCF (BP86) Energy = -2262.04804684  
Enthalpy 0K = -2261.136093  
Enthalpy 298K = -2261.135148  
Free Energy 298K = -2261.286790  
Lowest Frequency = 6.1094 cm<sup>-1</sup>  
Second Frequency = 8.9373 cm<sup>-1</sup>  
SCF (BP86-D3BJ) Energy = -  
2262.29320354  
SCF (C6H6) Energy = -2262.05809160  
SCF (BS2) Energy = -2262.56358893  
SCF (PBE0-D3BJ-BS2-C6H6) Energy = -  
2260.107615  
SCF (wB97XD-BS2-C6H6) Energy = -  
2261.864727

N -2.42980 1.37541 -1.36556  
B -3.44361 0.39615 -1.06593  
O -4.55175 0.59131 -0.24182  
O -3.41634 -0.87999 -1.63076  
C -5.21643 -0.70540 -0.09562  
C -4.72616 -1.47890 -1.38501  
C -6.72675 -0.46163 -0.01806  
C -4.70676 -1.32760 1.21557  
C -4.54120 -2.98830 -1.20304  
C -5.59094 -1.19088 -2.62620  
H -7.27564 -1.41814 0.02478  
H -6.96582 0.10739 0.89551  
H -7.09004 0.11441 -0.88198  
H -5.22271 -2.27642 1.44050  
H -3.62256 -1.52028 1.17287  
H -4.90045 -0.62491 2.04246  
H -5.49848 -3.47126 -0.94079  
H -4.18406 -3.43365 -2.14627  
H -3.80193 -3.21285 -0.41961  
H -5.07666 -1.58356 -3.51825  
H -6.58072 -1.67252 -2.55625  
H -5.73818 -0.10736 -2.76698  
O -0.12344 0.96663 -2.07072  
Cu 0.72840 -0.01816 -0.81755  
C 1.91235 -0.84575 0.34003  
N 3.23003 -0.46845 0.52076  
N 1.77896 -1.94758 1.16108  
C 3.88685 -1.30751 1.42096  
C 3.85223 0.66901 -0.12883  
C 2.97254 -2.24069 1.82565  
C 0.56193 -2.71175 1.33992  
H 4.93059 -1.16229 1.68521  
C 3.85733 1.91442 0.54807  
C 4.44542 0.48525 -1.40284  
H 3.05449 -3.07645 2.51490  
C 0.29618 -3.78567 0.45441  
C -0.29152 -2.37784 2.42119  
C 4.49521 2.99520 -0.09122  
C 3.19922 2.11974 1.91222  
C 5.06513 1.60301 -1.99450  
C 4.41926 -0.85046 -2.14489

|   |          |          |          |
|---|----------|----------|----------|
| C | -0.87329 | -4.53723 | 0.68218  |
| C | 1.21078  | -4.13441 | -0.71914 |
| C | -1.44405 | -3.16712 | 2.60312  |
| C | -0.01366 | -1.20517 | 3.36140  |
| H | 4.51406  | 3.97184  | 0.40364  |
| C | 5.09451  | 2.84408  | -1.34733 |
| H | 2.72836  | 1.16673  | 2.21039  |
| C | 2.07968  | 3.18265  | 1.84059  |
| C | 4.24488  | 2.48042  | 2.99239  |
| H | 5.52751  | 1.49628  | -2.98139 |
| H | 3.91087  | -1.58829 | -1.49988 |
| C | 3.60010  | -0.74028 | -3.45148 |
| C | 5.84620  | -1.37751 | -2.41814 |
| H | -1.10955 | -5.37254 | 0.01478  |
| C | -1.73264 | -4.23741 | 1.74658  |
| H | 2.10080  | -3.48416 | -0.66077 |
| C | 0.51276  | -3.83759 | -2.06625 |
| C | 1.70123  | -5.59809 | -0.65043 |
| H | -2.12358 | -2.93719 | 3.43045  |
| H | 0.95568  | -0.76172 | 3.07524  |
| C | -1.08691 | -0.10422 | 3.20225  |
| C | 0.10382  | -1.66524 | 4.83199  |
| H | 5.58192  | 3.69943  | -1.82686 |
| H | 2.48235  | 4.17607  | 1.57719  |
| H | 1.57918  | 3.27752  | 2.81957  |
| H | 1.31923  | 2.91617  | 1.08839  |
| H | 4.74711  | 3.43594  | 2.76127  |
| H | 5.02533  | 1.70507  | 3.07875  |
| H | 3.75893  | 2.58916  | 3.97736  |
| H | 2.57080  | -0.39918 | -3.24847 |
| H | 3.55017  | -1.72091 | -3.95624 |
| H | 4.06182  | -0.02482 | -4.15430 |
| H | 6.40811  | -0.69735 | -3.08169 |
| H | 5.80288  | -2.36308 | -2.91320 |
| H | 6.42444  | -1.48769 | -1.48495 |
| H | -2.63076 | -4.84217 | 1.91100  |
| H | 1.18973  | -4.06511 | -2.90794 |
| H | 0.21977  | -2.77616 | -2.13454 |
| H | -0.39687 | -4.45127 | -2.18890 |
| H | 0.86525  | -6.31293 | -0.74426 |
| H | 2.21797  | -5.80947 | 0.30110  |
| H | 2.40478  | -5.80342 | -1.47549 |
| H | -1.13902 | 0.25486  | 2.16122  |
| H | -0.85397 | 0.75696  | 3.85186  |
| H | -2.08728 | -0.47644 | 3.48438  |
| H | -0.84454 | -2.09372 | 5.20035  |
| H | 0.35419  | -0.80890 | 5.48139  |
| H | 0.88812  | -2.43105 | 4.95726  |
| C | -1.44919 | 1.02019  | -2.45490 |
| H | -1.82078 | 0.06998  | -2.87891 |
| H | -1.56627 | 1.81304  | -3.22926 |
| C | -2.34017 | 2.67415  | -0.82336 |
| C | -1.25697 | 3.52521  | -1.18388 |
| C | -3.31529 | 3.18864  | 0.07523  |
| C | -1.16868 | 4.82571  | -0.68633 |
| H | -0.45775 | 3.13075  | -1.81517 |
| C | -3.21826 | 4.48671  | 0.57505  |
| H | -4.15754 | 2.56230  | 0.37101  |
| C | -2.14644 | 5.33325  | 0.20188  |
| H | -0.32626 | 5.46042  | -0.97796 |
| H | -3.98474 | 4.86170  | 1.26033  |
| C | -2.04712 | 6.66292  | 0.72034  |
| N | -1.96237 | 7.75780  | 1.15008  |

TS1'

SCF (BP86) Energy = -1850.07802944  
 Enthalpy 0K = -1849.389067  
 Enthalpy 298K = -1849.388123  
 Free Energy 298K = -1849.521457  
 Lowest Frequency = -233.1015 cm-1  
 Second Frequency = 4.3020 cm-1  
 SCF (BP86-D3BJ) Energy = -  
 1850.28711485  
 SCF (C6H6) Energy = -1850.10350531  
 SCF (BS2) Energy = -1850.50858747  
 SCF (PBE0-D3BJ-BS2-C6H6) Energy = -  
 1848.475791  
 SCF (wB97XD-BS2-C6H6) Energy = -  
 1849.887274

|    |          |          |          |
|----|----------|----------|----------|
| N  | 2.78326  | -0.82019 | -1.47608 |
| C  | 2.30020  | 0.06806  | -2.22726 |
| O  | 2.20673  | 1.01266  | -2.95434 |
| Cu | -0.39846 | -0.20871 | -1.13247 |
| N  | -2.64200 | -0.50126 | 0.76563  |
| N  | -1.57154 | 1.35083  | 1.10220  |
| C  | -1.56647 | 0.22692  | 0.30477  |
| C  | -3.29309 | 0.14982  | 1.81470  |
| H  | -4.16439 | -0.27618 | 2.30453  |
| C  | -2.61640 | 1.32053  | 2.02718  |
| H  | -2.77780 | 2.12482  | 2.73963  |
| C  | -3.04850 | -1.78625 | 0.22933  |
| C  | -2.50379 | -2.96229 | 0.80229  |
| C  | -2.92628 | -4.19588 | 0.26996  |
| H  | -2.51875 | -5.12387 | 0.68422  |
| C  | -3.84861 | -4.25447 | -0.78175 |
| H  | -4.16131 | -5.22500 | -1.18097 |
| C  | -4.36674 | -3.07428 | -1.32821 |
| H  | -5.08030 | -3.12942 | -2.15694 |
| C  | -3.98066 | -1.81175 | -0.83751 |
| C  | -1.46683 | -2.93006 | 1.92447  |
| H  | -1.36285 | -1.88432 | 2.26312  |
| C  | -0.08525 | -3.38349 | 1.39773  |
| H  | -0.11962 | -4.42764 | 1.04043  |
| H  | 0.67054  | -3.32490 | 2.20019  |
| H  | 0.24850  | -2.74921 | 0.55873  |
| C  | -1.90569 | -3.76844 | 3.14549  |
| H  | -1.98815 | -4.84048 | 2.89601  |
| H  | -2.88380 | -3.43858 | 3.53486  |
| H  | -1.16435 | -3.67590 | 3.95770  |
| C  | -4.53887 | -0.54178 | -1.47882 |
| H  | -4.17131 | 0.32308  | -0.89927 |
| C  | -4.01177 | -0.38500 | -2.92408 |
| H  | -2.90848 | -0.36528 | -2.94431 |
| H  | -4.38457 | 0.55323  | -3.37047 |
| H  | -4.34749 | -1.21989 | -3.56383 |
| C  | -6.08288 | -0.50453 | -1.43608 |
| H  | -6.52604 | -1.32356 | -2.02872 |
| H  | -6.45388 | 0.44567  | -1.85727 |
| H  | -6.46326 | -0.59387 | -0.40435 |
| C  | -0.60993 | 2.43203  | 0.99933  |
| C  | -0.87083 | 3.48850  | 0.09154  |
| C  | 0.07501  | 4.52989  | 0.02400  |
| H  | -0.09114 | 5.35706  | -0.67390 |
| C  | 1.22218  | 4.52196  | 0.82646  |
| H  | 1.94416  | 5.34221  | 0.75603  |
| C  | 1.45052  | 3.46441  | 1.71491  |

|   |          |          |          |    |          |          |          |
|---|----------|----------|----------|----|----------|----------|----------|
| H | 2.35382  | 3.46307  | 2.33387  | H  | -2.18143 | -3.81572 | -1.59005 |
| C | 0.54287  | 2.39270  | 1.82246  | H  | -2.29263 | -5.59392 | -1.46431 |
| C | 0.83225  | 1.24560  | 2.79028  | C  | -0.93059 | -5.91930 | 0.89552  |
| H | 0.00936  | 0.51417  | 2.70865  | H  | -0.87066 | -6.85496 | 0.31268  |
| C | 2.13844  | 0.51167  | 2.41105  | H  | -0.10590 | -5.90224 | 1.62356  |
| H | 2.09869  | 0.13004  | 1.37753  | H  | -1.87940 | -5.92931 | 1.45705  |
| H | 2.30787  | -0.34209 | 3.08985  | C  | 1.67464  | -5.11643 | -0.15445 |
| H | 3.01373  | 1.17939  | 2.49210  | H  | 1.65487  | -6.21906 | -0.11816 |
| C | 0.87191  | 1.73884  | 4.25479  | H  | 2.58097  | -4.80461 | -0.69897 |
| H | 1.68943  | 2.46347  | 4.41342  | H  | 1.74539  | -4.73039 | 0.87531  |
| H | 1.04045  | 0.89138  | 4.94145  | C  | 0.36004  | -5.08881 | -2.30324 |
| H | -0.07203 | 2.23166  | 4.54383  | H  | 1.31631  | -4.91119 | -2.82337 |
| C | -2.10438 | 3.52090  | -0.81014 | H  | 0.17516  | -6.17721 | -2.29813 |
| H | -2.74281 | 2.65981  | -0.54559 | H  | -0.43846 | -4.60080 | -2.88177 |
| C | -1.70315 | 3.35833  | -2.29432 | H  | 0.45488  | -1.70351 | 0.86475  |
| H | -2.60087 | 3.34738  | -2.93665 | Cu | 0.03436  | -0.09118 | -0.08850 |
| H | -1.14869 | 2.41798  | -2.45568 | C  | 1.11442  | 1.43433  | 0.04825  |
| H | -1.05949 | 4.19088  | -2.62795 | N  | 2.42755  | 1.52093  | 0.45930  |
| C | -2.94138 | 4.80123  | -0.59089 | N  | 0.79317  | 2.72950  | -0.29868 |
| H | -2.37774 | 5.70804  | -0.87091 | C  | 3.22974  | 0.41028  | 0.93793  |
| H | -3.24947 | 4.91027  | 0.46286  | C  | 2.90427  | 2.82829  | 0.37139  |
| H | -3.85219 | 4.77332  | -1.21353 | C  | -0.50341 | 3.16101  | -0.79184 |
| H | 0.46862  | -0.58092 | -2.33762 | C  | 1.87175  | 3.59101  | -0.10419 |
| C | 4.16301  | -0.91343 | -1.20641 | C  | 3.95940  | -0.35758 | -0.00364 |
| C | 5.13239  | -0.01889 | -1.72587 | C  | 3.27712  | 0.16563  | 2.33288  |
| C | 4.58531  | -1.96862 | -0.36371 | H  | 3.92014  | 3.08911  | 0.65450  |
| C | 6.48157  | -0.17498 | -1.40556 | C  | -0.75661 | 3.09817  | -2.18688 |
| H | 4.81640  | 0.79772  | -2.38236 | C  | -1.44567 | 3.65741  | 0.14248  |
| C | 5.93318  | -2.12722 | -0.04166 | H  | 1.80260  | 4.65442  | -0.31495 |
| H | 3.82995  | -2.65696 | 0.02523  | C  | 4.77437  | -1.38966 | 0.50067  |
| C | 6.90032  | -1.22994 | -0.55780 | C  | 3.90513  | -0.09272 | -1.50786 |
| H | 7.22598  | 0.51811  | -1.80852 | C  | 4.10664  | -0.88218 | 2.77731  |
| H | 6.25274  | -2.94559 | 0.61004  | C  | 2.46850  | 0.97596  | 3.34584  |
| C | 8.28464  | -1.38611 | -0.22497 | C  | -2.00968 | 3.56051  | -2.63164 |
| N | 9.42287  | -1.51392 | 0.05210  | C  | 0.28921  | 2.60121  | -3.18641 |
|   |          |          |          | C  | -2.67961 | 4.11051  | -0.36422 |
|   |          |          |          | C  | -1.16187 | 3.73714  | 1.64281  |
|   |          |          |          | H  | 5.35296  | -2.00115 | -0.19898 |
|   |          |          |          | C  | 4.85210  | -1.64917 | 1.87417  |
|   |          |          |          | H  | 3.08686  | 0.62432  | -1.69582 |
|   |          |          |          | C  | 3.58271  | -1.37431 | -2.30859 |
|   |          |          |          | C  | 5.21988  | 0.55718  | -1.99972 |
|   |          |          |          | H  | 4.16428  | -1.09965 | 3.84899  |
|   |          |          |          | H  | 1.87316  | 1.72158  | 2.79040  |
|   |          |          |          | C  | 1.47437  | 0.07517  | 4.11353  |
|   |          |          |          | C  | 3.38930  | 1.74690  | 4.31897  |
|   |          |          |          | H  | -2.24576 | 3.51831  | -3.69876 |
|   |          |          |          | C  | -2.96025 | 4.06313  | -1.73406 |
|   |          |          |          | H  | 0.97961  | 1.93278  | -2.64035 |
|   |          |          |          | C  | -0.31609 | 1.78416  | -4.34760 |
|   |          |          |          | C  | 1.11704  | 3.78966  | -3.73531 |
|   |          |          |          | H  | -3.43225 | 4.49873  | 0.32948  |
|   |          |          |          | H  | -0.21986 | 3.19568  | 1.84066  |
|   |          |          |          | C  | -2.26607 | 3.05409  | 2.47909  |
|   |          |          |          | C  | -0.96030 | 5.20511  | 2.08732  |
|   |          |          |          | H  | 5.49226  | -2.45780 | 2.24215  |
|   |          |          |          | H  | 4.40739  | -2.10653 | -2.24779 |
|   |          |          |          | H  | 3.44727  | -1.12596 | -3.37559 |
|   |          |          |          | H  | 2.66521  | -1.86465 | -1.94198 |
|   |          |          |          | H  | 5.42833  | 1.50517  | -1.47479 |
|   |          |          |          | H  | 5.16437  | 0.77030  | -3.08125 |
|   |          |          |          | H  | 6.07997  | -0.11470 | -1.83215 |
|   |          |          |          | H  | 0.80784  | -0.46280 | 3.41925  |
|   |          |          |          | H  | 0.85297  | 0.68203  | 4.79447  |

TS2'

SCF (BP86) Energy = -2261.98631120  
 Enthalpy 0K = -2261.094663  
 Enthalpy 298K = -2261.093719  
 Free Energy 298K = -2261.243459  
 Lowest Frequency = -171.8631 cm-1  
 Second Frequency = 7.3439 cm-1  
 SCF (BP86-D3BJ) Energy = -  
 2262.25871826  
 SCF (C6H6) Energy = -2262.01118296  
 SCF (BS2) Energy = -2262.51621551  
 SCF (PBE0-D3BJ-BS2-C6H6) Energy = -  
 2260.065885  
 SCF (wB97XD-BS2-C6H6) Energy = -  
 2261.821653

|   |          |          |          |
|---|----------|----------|----------|
| O | -2.18772 | -1.03657 | -2.99735 |
| N | -1.42558 | -1.31017 | -0.76487 |
| C | -1.31313 | -1.28363 | -2.15645 |
| H | -0.27131 | -1.53463 | -2.45943 |
| C | 0.43913  | -4.54149 | -0.87331 |
| C | -0.89418 | -4.69359 | -0.02680 |
| B | -0.11966 | -2.53170 | 0.13248  |
| O | -0.86525 | -3.50594 | 0.82020  |
| O | 0.62537  | -3.09361 | -0.93795 |
| C | -2.17318 | -4.66170 | -0.88594 |
| H | -3.04476 | -4.55495 | -0.22030 |



|   |          |          |          |
|---|----------|----------|----------|
| H | 2.00105  | -0.67849 | 4.72438  |
| H | 4.00594  | 1.05648  | 4.92037  |
| H | 2.78891  | 2.35381  | 5.01843  |
| H | 4.07436  | 2.42318  | 3.77999  |
| H | -3.92874 | 4.41376  | -2.10548 |
| H | -0.95463 | 0.95956  | -3.99074 |
| H | 0.49635  | 1.35312  | -4.95765 |
| H | -0.91830 | 2.41791  | -5.02245 |
| H | 0.46671  | 4.49834  | -4.27764 |
| H | 1.88883  | 3.43088  | -4.43827 |
| H | 1.62418  | 4.34710  | -2.92969 |
| H | -3.23228 | 3.57946  | 2.38736  |
| H | -1.99027 | 3.05978  | 3.54783  |
| H | -2.42176 | 2.00905  | 2.16506  |
| H | -0.13580 | 5.68898  | 1.53625  |
| H | -0.72730 | 5.25533  | 3.16510  |
| H | -1.87340 | 5.80023  | 1.91170  |
| C | -2.66699 | -1.11341 | -0.10129 |
| C | -2.63539 | -0.95449 | 1.31042  |
| C | -3.93090 | -1.09446 | -0.74784 |
| C | -3.80337 | -0.77039 | 2.04866  |
| H | -1.67412 | -1.00022 | 1.83151  |
| C | -5.10212 | -0.91019 | -0.00794 |
| H | -3.96884 | -1.20202 | -1.83128 |
| C | -5.06031 | -0.74235 | 1.39611  |
| H | -3.75563 | -0.65563 | 3.13547  |
| H | -6.06867 | -0.89102 | -0.52065 |
| C | -6.26380 | -0.54240 | 2.14559  |
| N | -7.25254 | -0.37255 | 2.76437  |

TS3'

SCF (BP86) Energy = -2261.98682970  
 Enthalpy 0K = -2261.095027  
 Enthalpy 298K = -2261.094083  
 Free Energy 298K = -2261.243506  
 Lowest Frequency = -554.9659 cm<sup>-1</sup>  
 Second Frequency = 7.5171 cm<sup>-1</sup>  
 SCF (BP86-D3BJ) Energy = -  
 2262.24769332  
 SCF (C6H6) Energy = -2262.00947914  
 SCF (BS2) Energy = -2262.51627270  
 SCF (PBE0-D3BJ-BS2-C6H6) Energy = -  
 2260.05431  
 SCF (wB97XD-BS2-C6H6) Energy = -  
 2261.808664

|   |          |          |          |
|---|----------|----------|----------|
| O | -0.76606 | -0.17054 | -1.77572 |
| N | -2.84273 | -0.07777 | -0.61625 |
| C | -1.57619 | -0.72343 | -0.92789 |
| H | -1.73803 | -1.81579 | -0.94502 |
| B | -3.93546 | -0.93303 | -0.20131 |
| O | -5.15589 | -0.47500 | 0.27054  |
| O | -3.82991 | -2.31762 | -0.23465 |
| C | -6.02724 | -1.65226 | 0.37229  |
| C | -4.98390 | -2.83493 | 0.50866  |
| C | -6.84577 | -1.71583 | -0.92910 |
| C | -6.95130 | -1.45840 | 1.57752  |
| C | -4.51619 | -3.06533 | 1.95624  |
| C | -5.41261 | -4.15731 | -0.13315 |
| H | -7.58169 | -2.53685 | -0.90717 |
| H | -7.39242 | -0.76731 | -1.05617 |
| H | -6.19205 | -1.85595 | -1.80578 |
| H | -7.58524 | -2.34864 | 1.73077  |

|   |          |          |          |
|---|----------|----------|----------|
| H | -6.38145 | -1.26799 | 2.49892  |
| H | -7.61396 | -0.59510 | 1.40260  |
| H | -5.30847 | -3.52317 | 2.57191  |
| H | -3.64784 | -3.74360 | 1.94759  |
| H | -4.20506 | -2.11996 | 2.43025  |
| H | -4.61045 | -4.90407 | -0.01473 |
| H | -6.31989 | -4.55243 | 0.35523  |
| H | -5.61309 | -4.04115 | -1.20858 |
| N | 3.23382  | -1.12877 | -0.04432 |
| N | 3.03366  | 0.97597  | 0.43938  |
| C | 2.28436  | -0.13972 | 0.12602  |
| C | 4.52711  | -0.64109 | 0.15761  |
| H | 5.40261  | -1.27781 | 0.06591  |
| C | 4.40142  | 0.68568  | 0.46271  |
| H | 5.14449  | 1.44442  | 0.69167  |
| C | 2.91745  | -2.50011 | -0.38665 |
| C | 2.81989  | -2.85519 | -1.75561 |
| C | 2.51778  | -4.19859 | -2.05421 |
| H | 2.43231  | -4.50450 | -3.10218 |
| C | 2.32171  | -5.14238 | -1.03901 |
| H | 2.08670  | -6.18081 | -1.29589 |
| C | 2.42287  | -4.76027 | 0.30443  |
| H | 2.26217  | -5.50349 | 1.09267  |
| C | 2.72256  | -3.43210 | 0.66404  |
| C | 3.03049  | -1.85355 | -2.89066 |
| H | 3.23660  | -0.86752 | -2.43936 |
| C | 1.75882  | -1.70462 | -3.75697 |
| H | 1.48937  | -2.66079 | -4.24007 |
| H | 1.93488  | -0.96719 | -4.55961 |
| H | 0.89923  | -1.36008 | -3.15701 |
| C | 4.25718  | -2.23741 | -3.75048 |
| H | 4.10849  | -3.20958 | -4.25245 |
| H | 5.17520  | -2.31197 | -3.14251 |
| H | 4.42621  | -1.48020 | -4.53547 |
| C | 2.80654  | -3.04349 | 2.13998  |
| H | 3.09480  | -1.97947 | 2.19571  |
| C | 1.42789  | -3.18056 | 2.82590  |
| H | 0.67582  | -2.54968 | 2.32239  |
| H | 1.49279  | -2.86894 | 3.88313  |
| H | 1.07270  | -4.22606 | 2.80471  |
| C | 3.88931  | -3.85764 | 2.88355  |
| H | 4.88058  | -3.74010 | 2.41352  |
| H | 3.65018  | -4.93537 | 2.89462  |
| H | 3.96595  | -3.52455 | 3.93305  |
| C | 2.48750  | 2.29185  | 0.69790  |
| C | 2.15536  | 2.63856  | 2.03210  |
| C | 1.65881  | 3.93695  | 2.25911  |
| H | 1.38747  | 4.23507  | 3.27725  |
| C | 1.50646  | 4.84977  | 1.20750  |
| H | 1.12348  | 5.85607  | 1.40738  |
| C | 1.83769  | 4.47525  | -0.10120 |
| H | 1.70740  | 5.19261  | -0.91821 |
| C | 2.33331  | 3.18781  | -0.38994 |
| C | 2.67624  | 2.80984  | -1.83076 |
| H | 3.06275  | 1.77597  | -1.82801 |
| C | 1.41838  | 2.82785  | -2.72977 |
| H | 0.65034  | 2.12546  | -2.36661 |
| H | 1.68695  | 2.53819  | -3.76057 |
| H | 0.97102  | 3.83639  | -2.77324 |
| C | 3.78807  | 3.71998  | -2.40140 |
| H | 3.45867  | 4.77201  | -2.46042 |
| H | 4.05761  | 3.39923  | -3.42242 |
| H | 4.69965  | 3.68875  | -1.78027 |
| C | 2.30142  | 1.66275  | 3.19966  |

|    |          |          |          |   |          |         |          |
|----|----------|----------|----------|---|----------|---------|----------|
| H  | 2.77457  | 0.74217  | 2.81616  | C | -1.92300 | 3.52930 | -0.24034 |
| C  | 0.91722  | 1.26565  | 3.76261  | H | -0.89034 | 1.66308 | 0.06320  |
| H  | 1.03323  | 0.55036  | 4.59559  | C | -4.23244 | 3.37127 | -1.00641 |
| H  | 0.29682  | 0.79053  | 2.98399  | H | -4.98804 | 1.37359 | -1.31079 |
| H  | 0.37388  | 2.14641  | 4.14770  | C | -3.12697 | 4.16719 | -0.62177 |
| C  | 3.21781  | 2.22872  | 4.30774  | H | -1.06174 | 4.13015 | 0.06407  |
| H  | 2.78719  | 3.13460  | 4.76873  | H | -5.16627 | 3.85398 | -1.30884 |
| H  | 4.21402  | 2.49428  | 3.91494  | C | -3.21983 | 5.59642 | -0.61913 |
| H  | 3.35318  | 1.48252  | 5.10963  | N | -3.28940 | 6.77301 | -0.61356 |
| Cu | 0.43811  | -0.37590 | -0.05510 |   |          |         |          |
| H  | -0.94547 | -0.80929 | 0.61560  |   |          |         |          |
| C  | -2.92975 | 1.33875  | -0.62683 |   |          |         |          |
| C  | -1.82633 | 2.13724  | -0.24724 |   |          |         |          |
| C  | -4.13016 | 1.97972  | -1.01384 |   |          |         |          |

## NMR Spectra

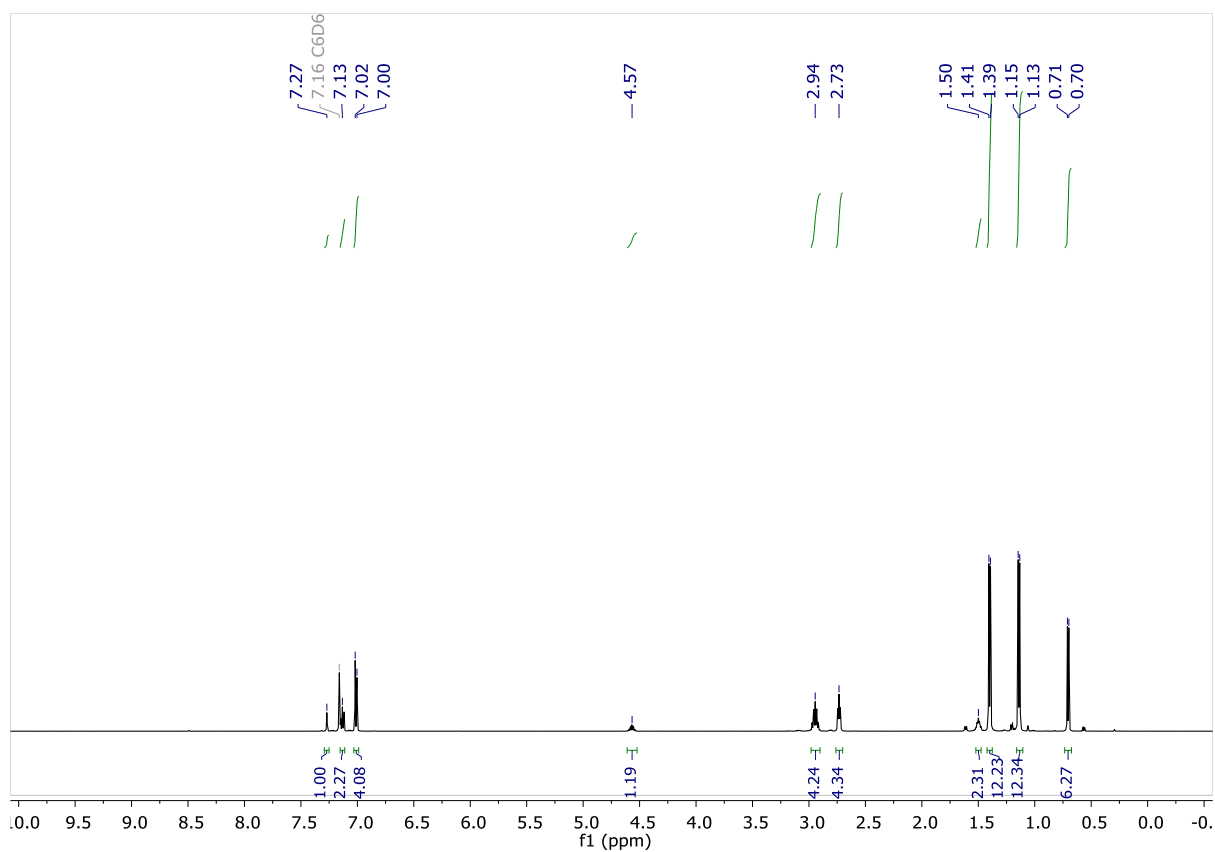

Figure S3: <sup>1</sup>H NMR spectrum for (6-Dipp)CuN(iPr)C(O)H

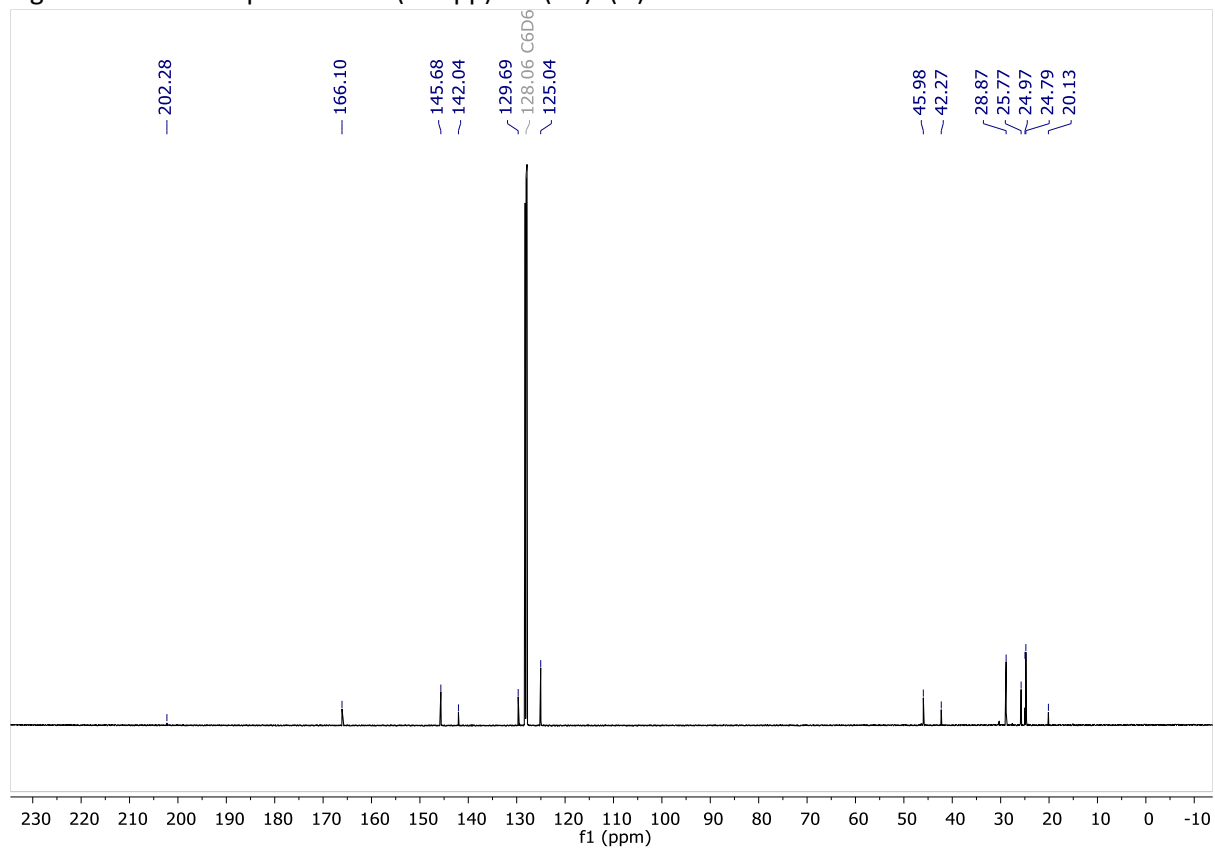

Figure S4: <sup>13</sup>C NMR spectrum for (6-Dipp)CuN(iPr)C(O)H

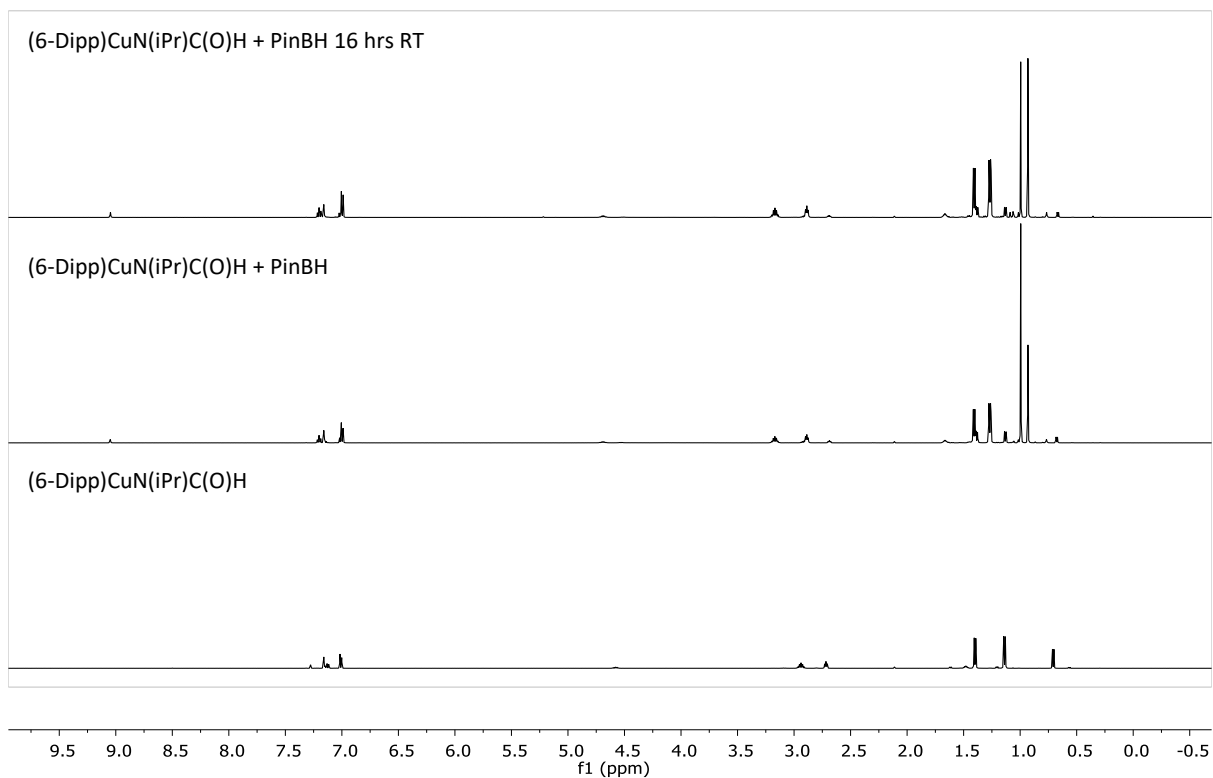

Figure S5: Stacked  $^1\text{H}$  NMR Spectra for the reaction between (6-Dipp)CuN(iPr)C(O)H and Pinacolborane

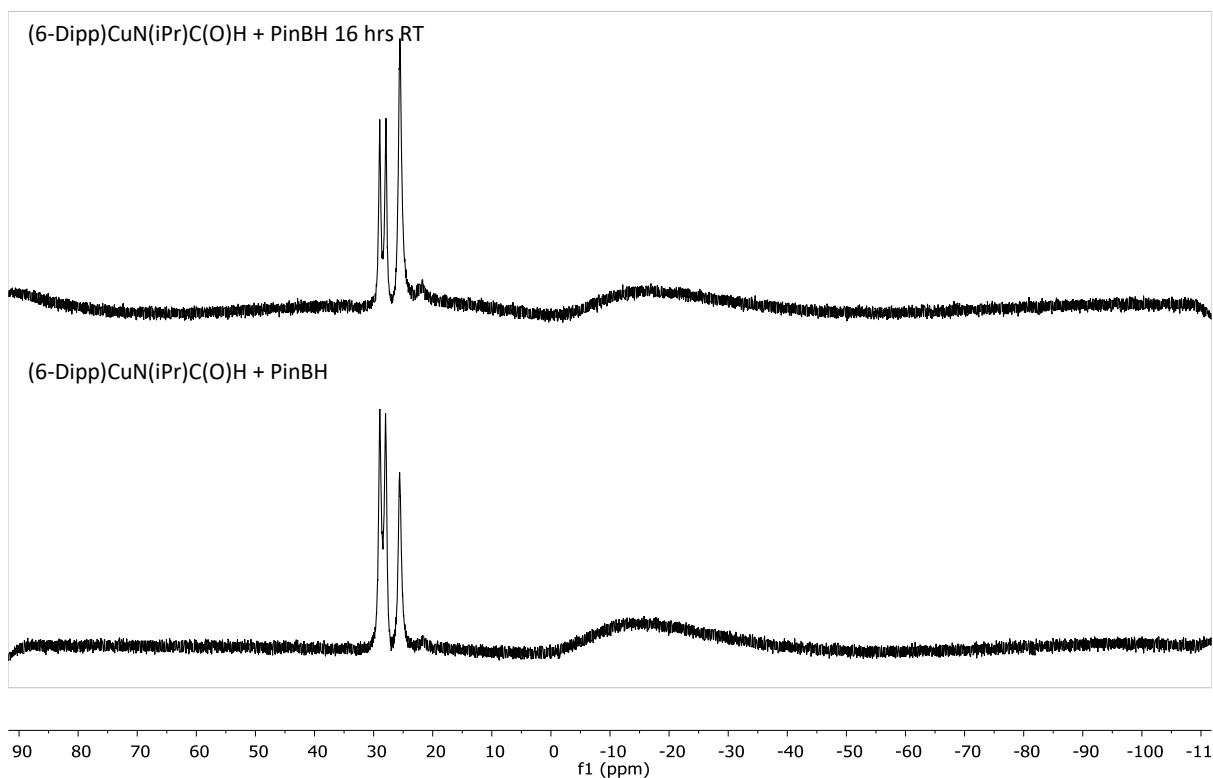

Figure S6: Stacked  $^{11}\text{B}$  NMR Spectra for the reaction between (6-Dipp)CuN(iPr)C(O)H and Pinacolborane

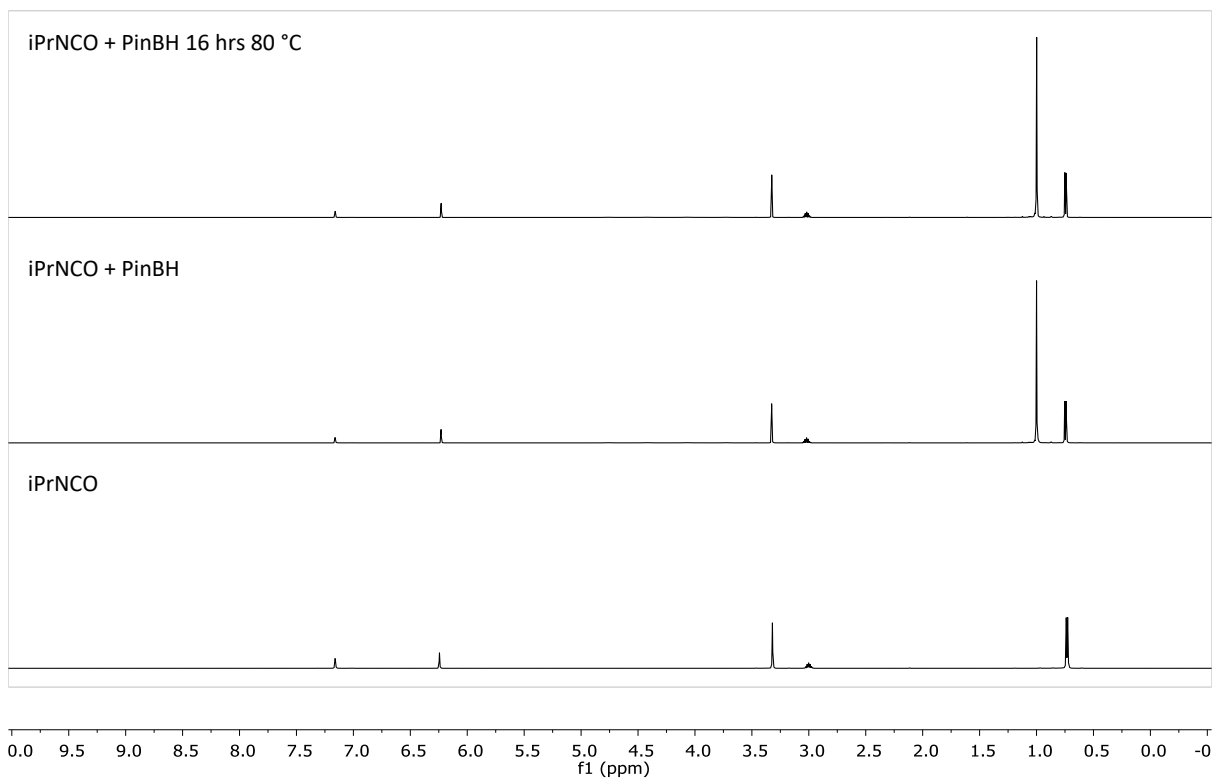

Figure S7: Stacked  $^1\text{H}$  NMR Spectra for the reaction between iPrNCO and Pinacolborane

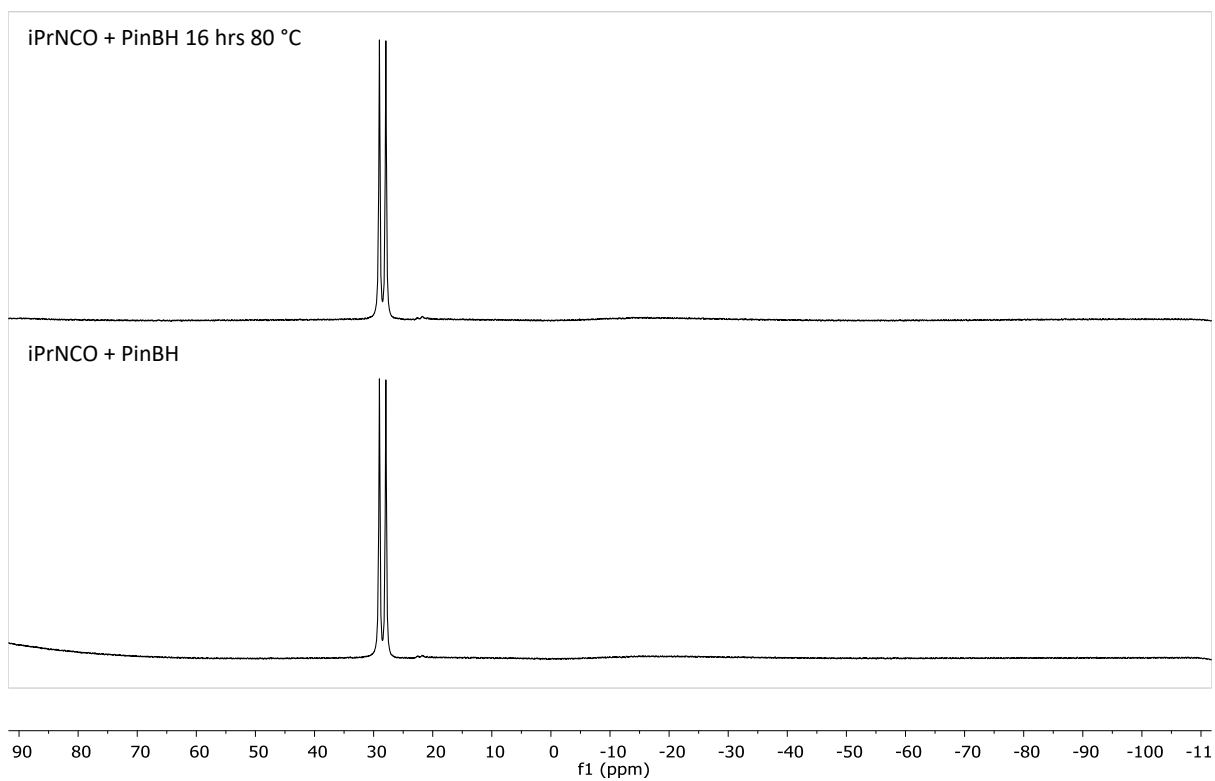

Figure S8: Stacked  $^1\text{H}$  NMR Spectra for the reaction between iPrNCO and Pinacolborane

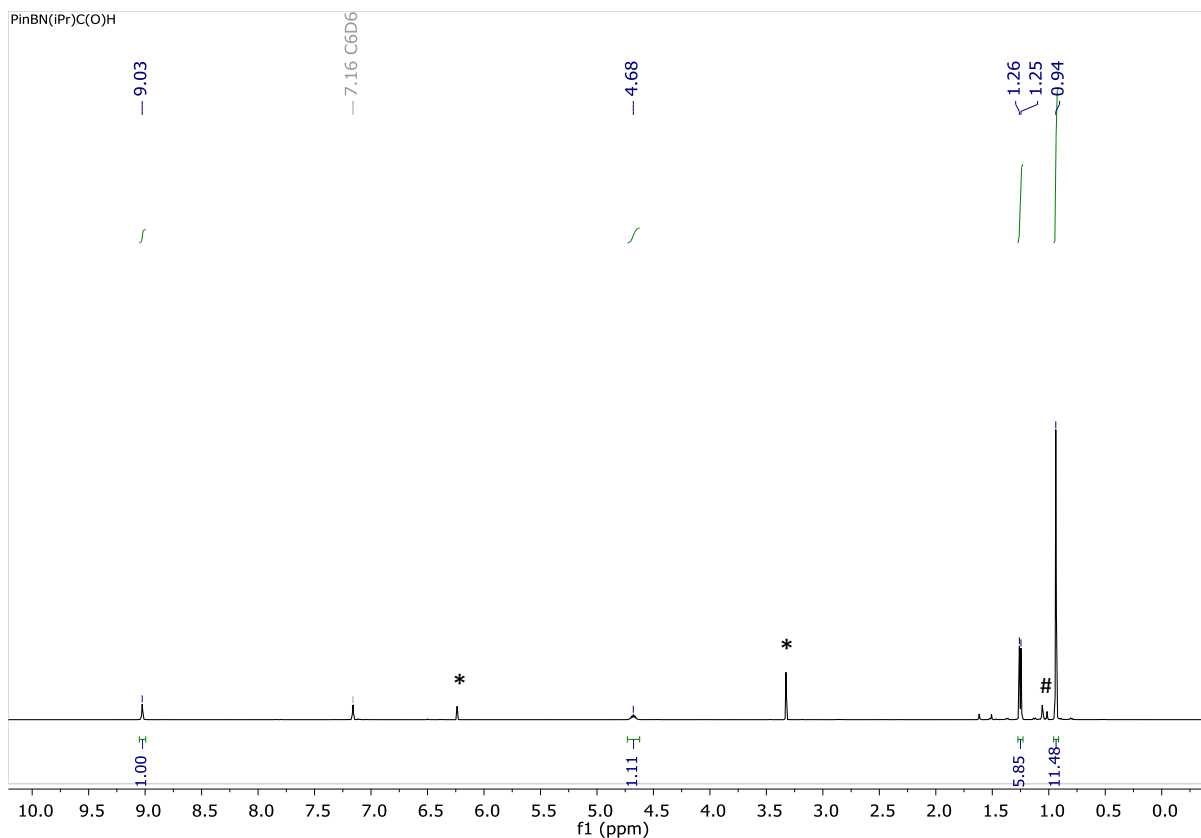

Figure S9:  $^1\text{H}$  NMR spectrum for PinBN(iPr)C(O)H, 1a.  $\text{C}_6\text{H}_3(\text{OMe})_3$  internal standard indicated with \*, PinBotBu indicated with #.

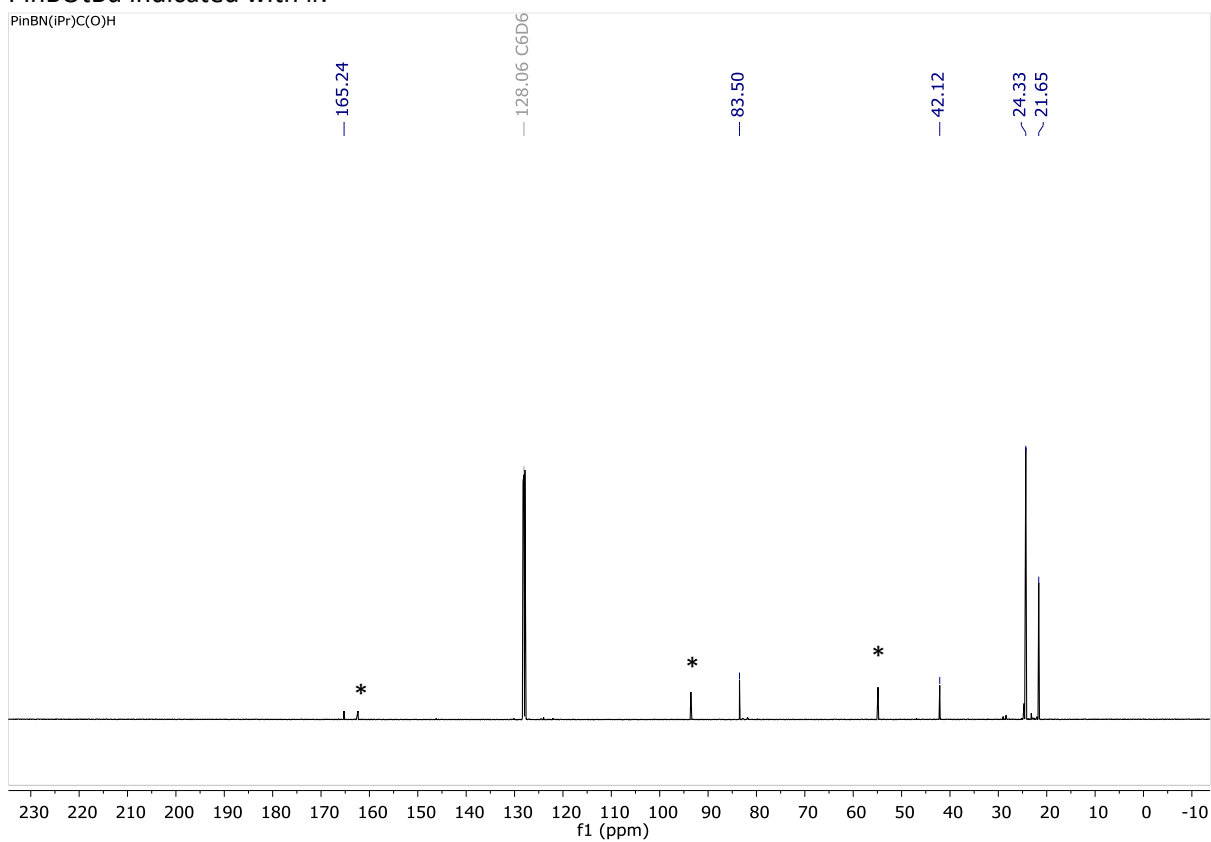

Figure S10:  $^{13}\text{C}$  NMR spectrum for PinBN(iPr)C(O)H, 1a.  $\text{C}_6\text{H}_3(\text{OMe})_3$  internal standard indicated with \*.

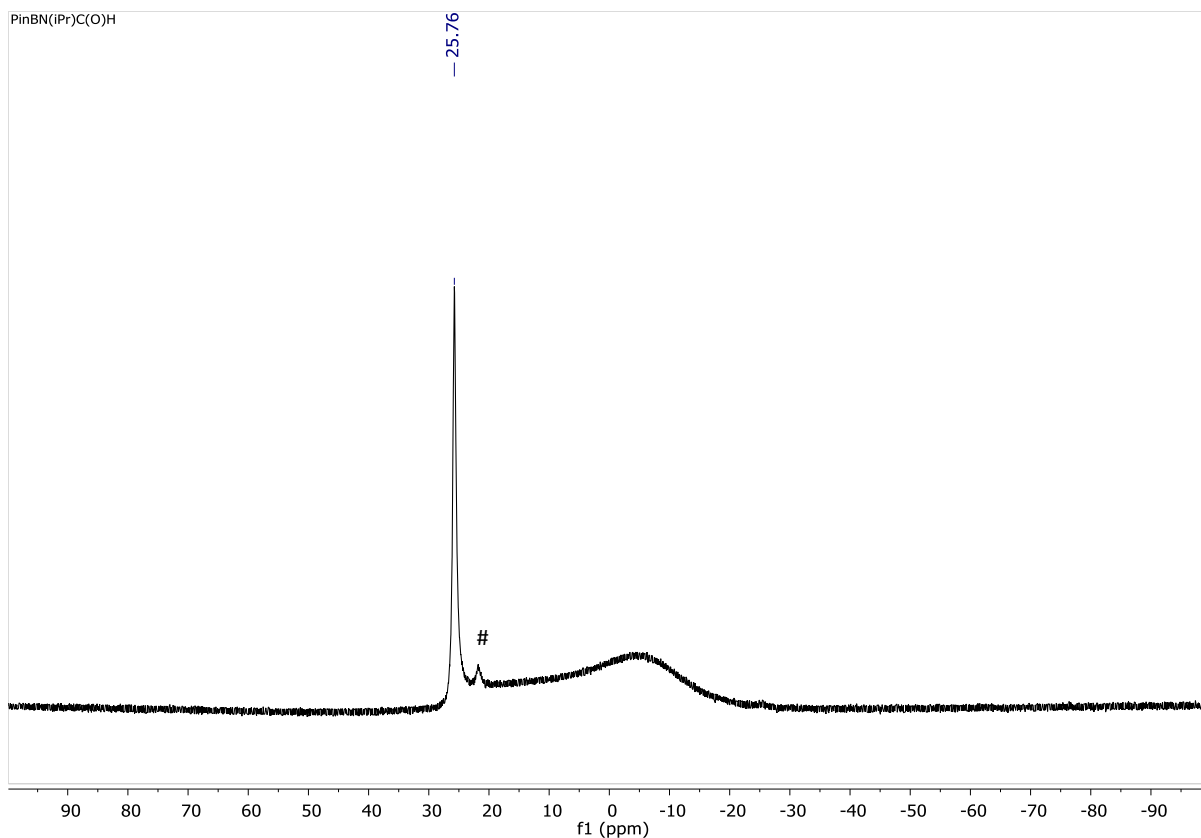

Figure S11:  $^{11}\text{B}$  NMR spectrum for PinBN(iPr)C(O)H, 1a, PinBOtBu indicated with #.

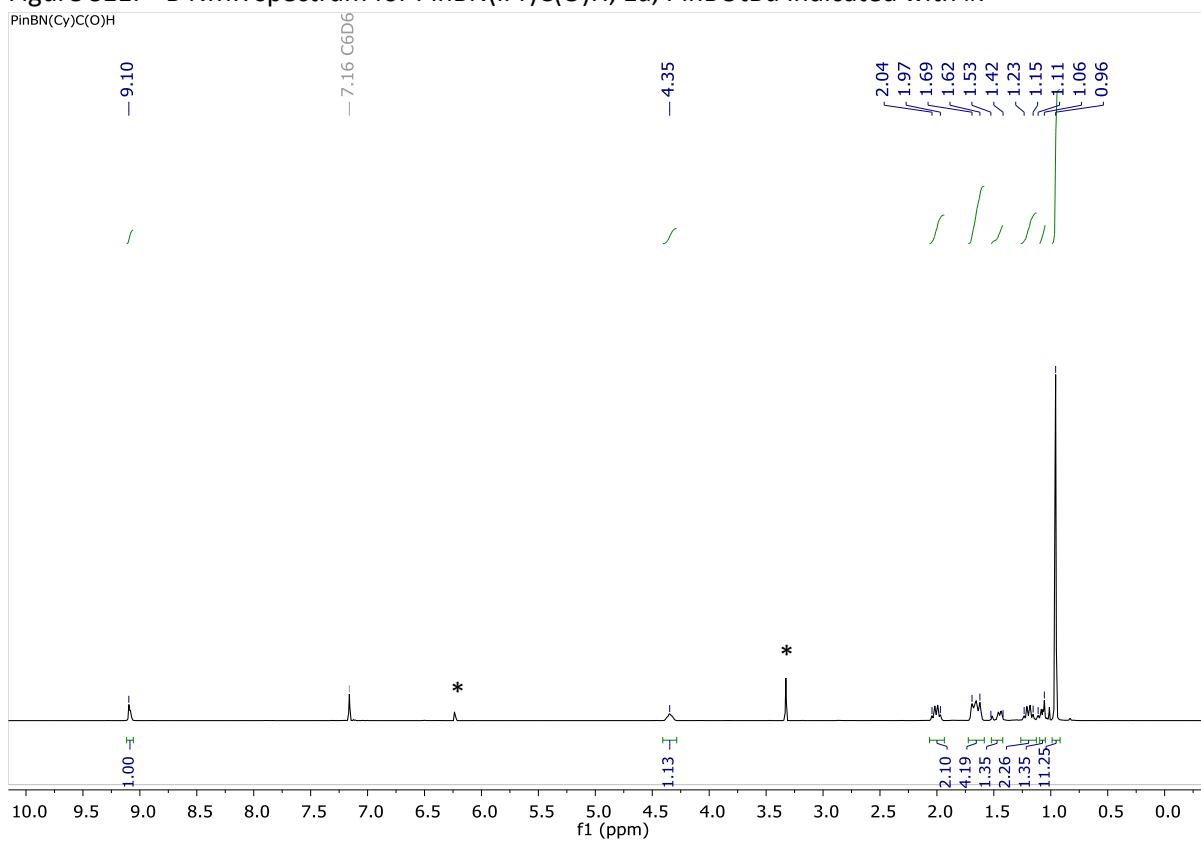

Figure S12:  $^1\text{H}$  NMR spectrum for PinBN(Cy)C(O)H, 1b.  $\text{C}_6\text{H}_3(\text{OMe})_3$  internal standard indicated with \*.

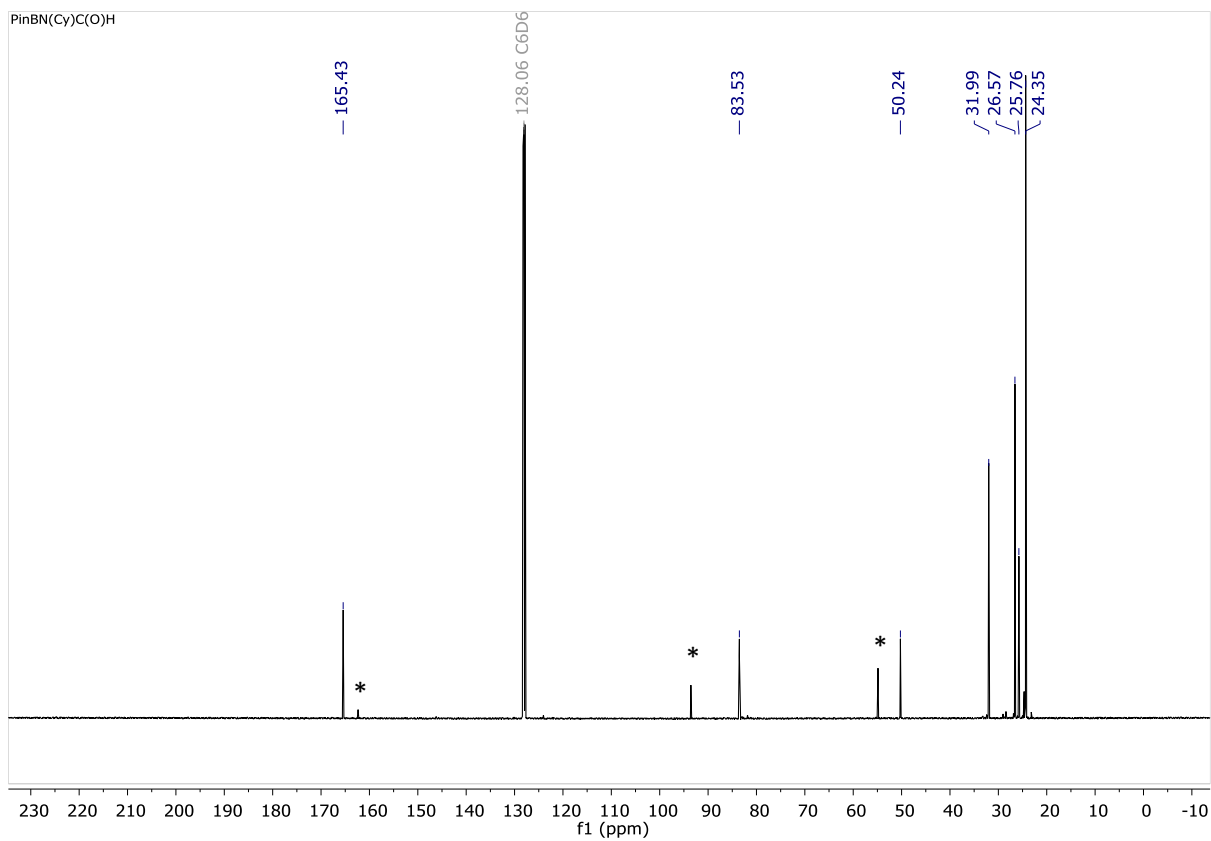

Figure S13:  $^{13}\text{C}$  NMR spectrum for PinBN(Cy)C(O)H, 1b.  $\text{C}_6\text{H}_3(\text{OMe})_3$  internal standard indicated with \*.

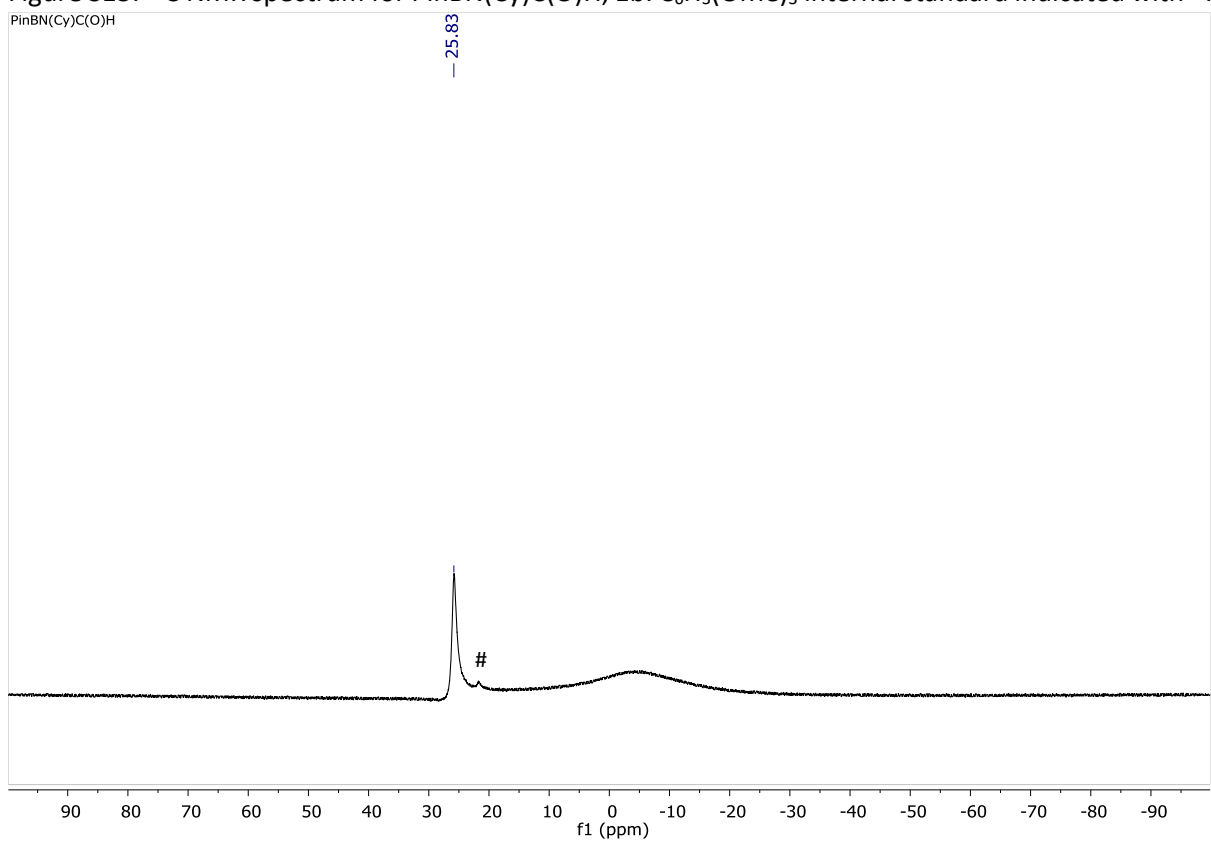

Figure S14:  $^{11}\text{B}$  NMR spectrum for PinBN(Cy)C(O)H, 1b, PinBOtBu indicated with #.



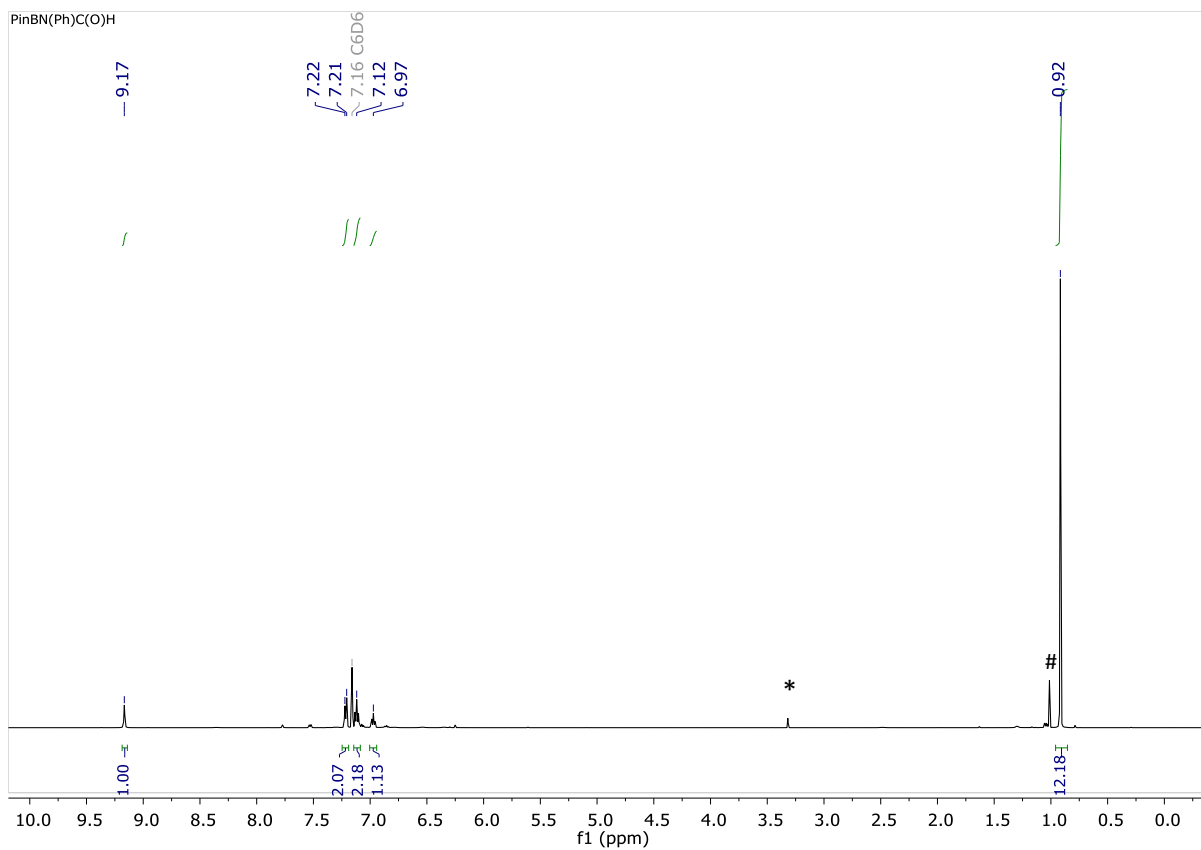

Figure S15:  $^1\text{H}$  NMR spectrum for PinBN(Ph)C(O)H, 1d.  $\text{C}_6\text{H}_3(\text{OMe})_3$  internal standard indicated with \*, PinBOtBu indicated with #.

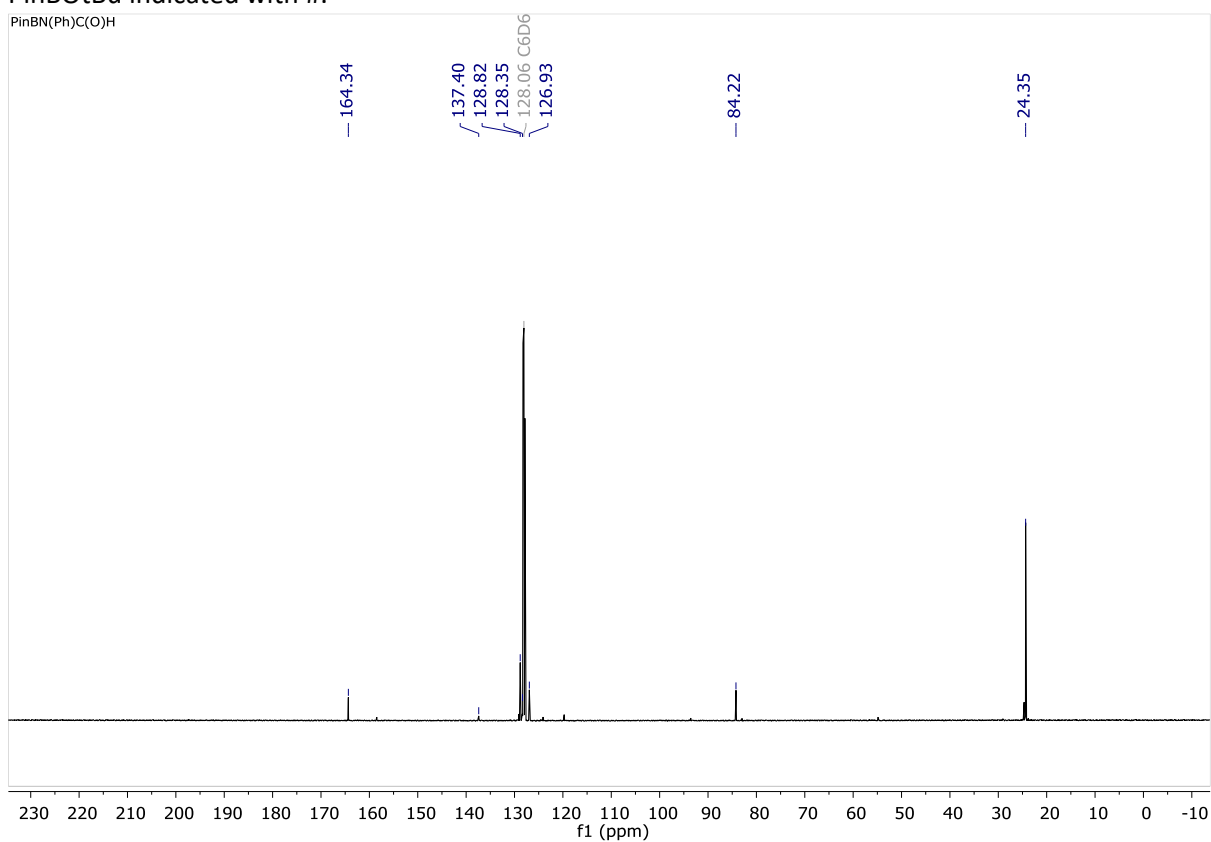

Figure S16:  $^{13}\text{C}$  NMR spectrum for PinBN(Ph)C(O)H, 1d.

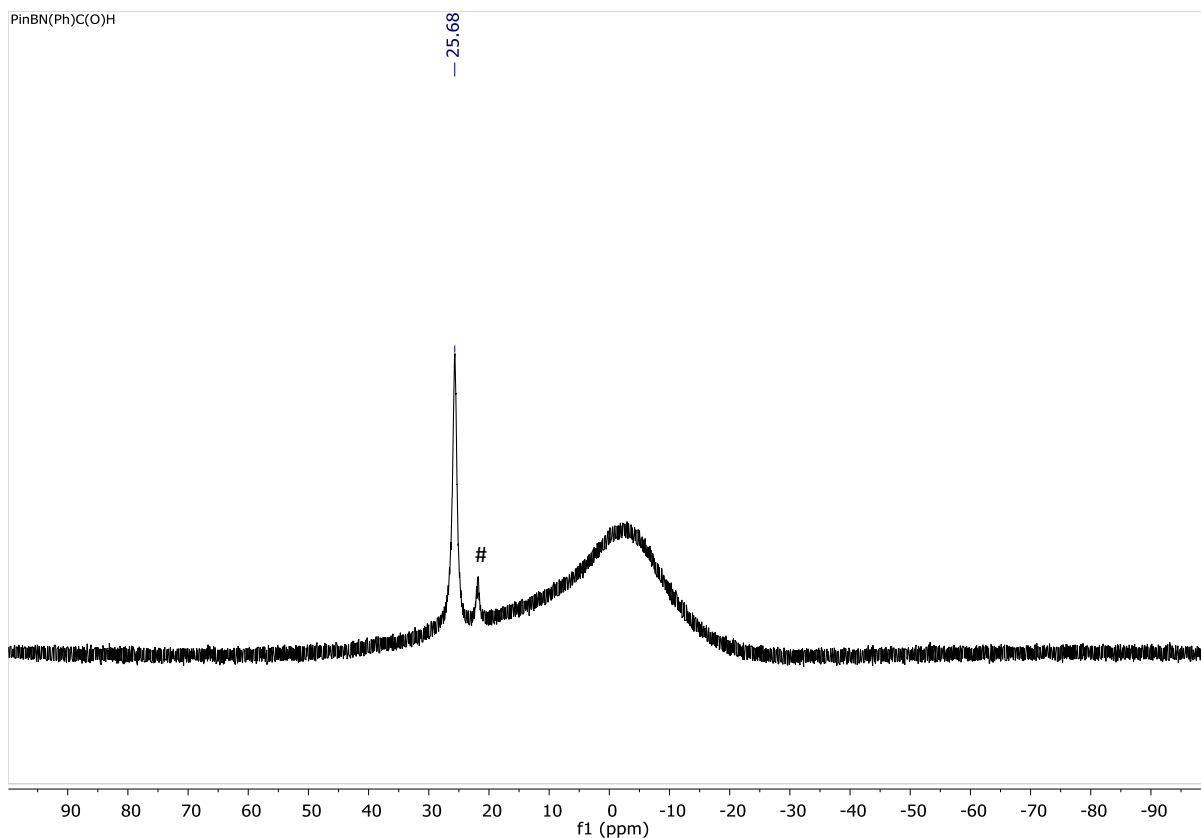

Figure S17:  $^{11}\text{B}$  NMR spectrum for PinBN(Ph)C(O)H, 1d, PinBOTbu indicated with #.

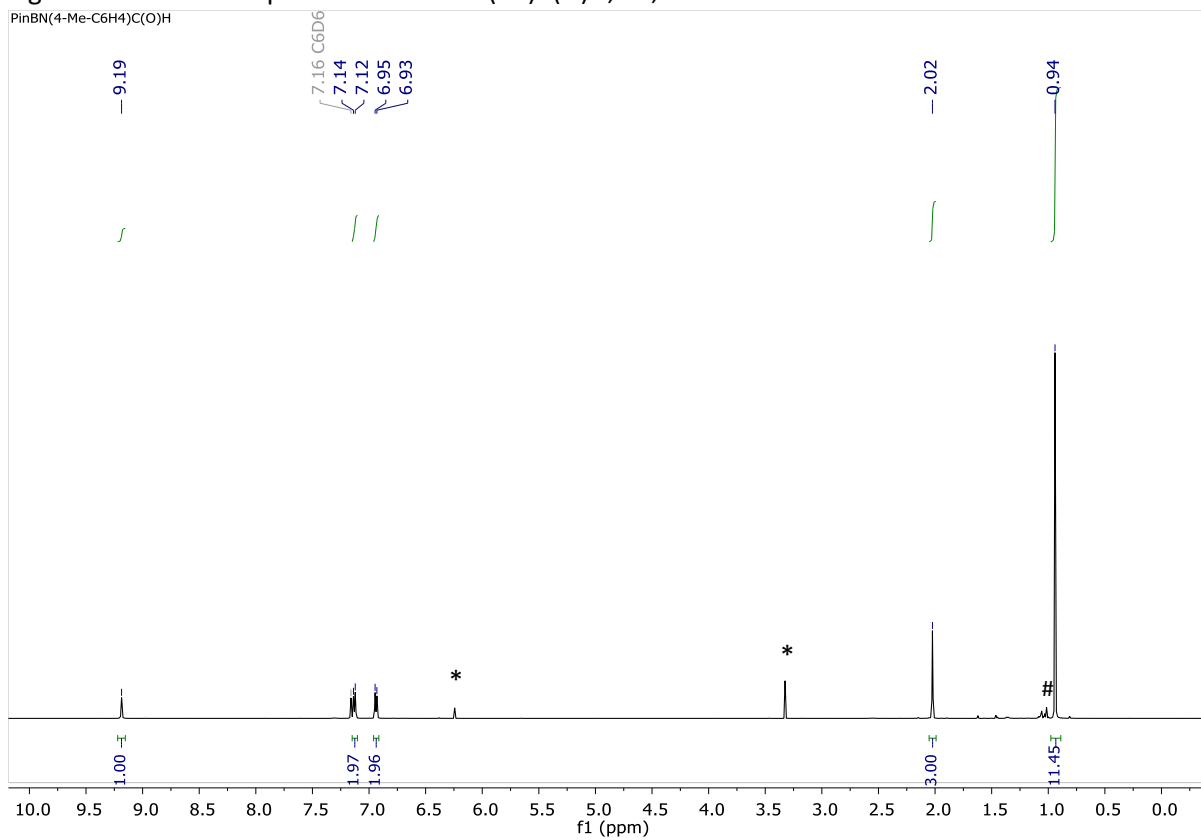

Figure S18:  $^1\text{H}$  NMR spectrum for PinBN(4-Me-C<sub>6</sub>H<sub>4</sub>)C(O)H, 1e. C<sub>6</sub>H<sub>3</sub>(OMe)<sub>3</sub> internal standard indicated with \*, PinBOTbu indicated with #.

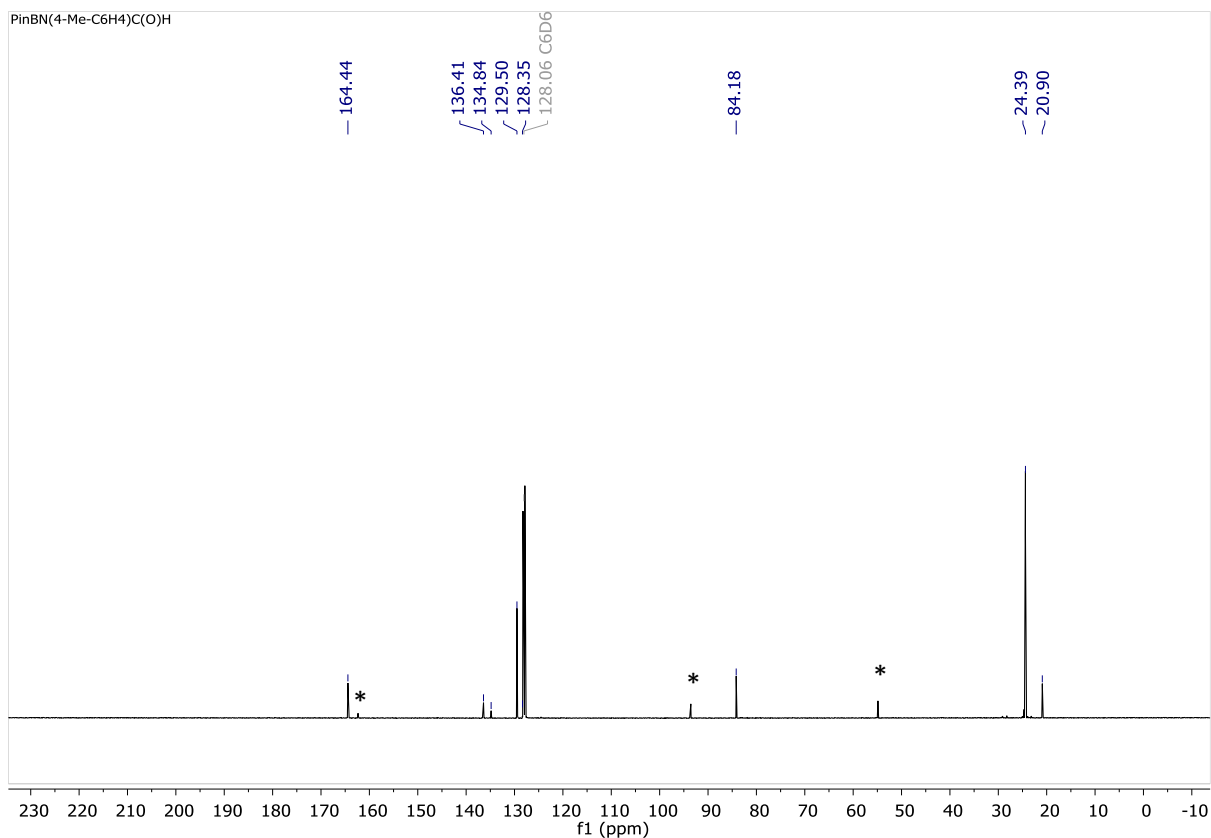

Figure S19:  $^{13}\text{C}$  NMR spectrum for PinBN(4-Me-C<sub>6</sub>H<sub>4</sub>)C(O)H, 1e. C<sub>6</sub>H<sub>3</sub>(OMe)<sub>3</sub> internal standard indicated with \*.

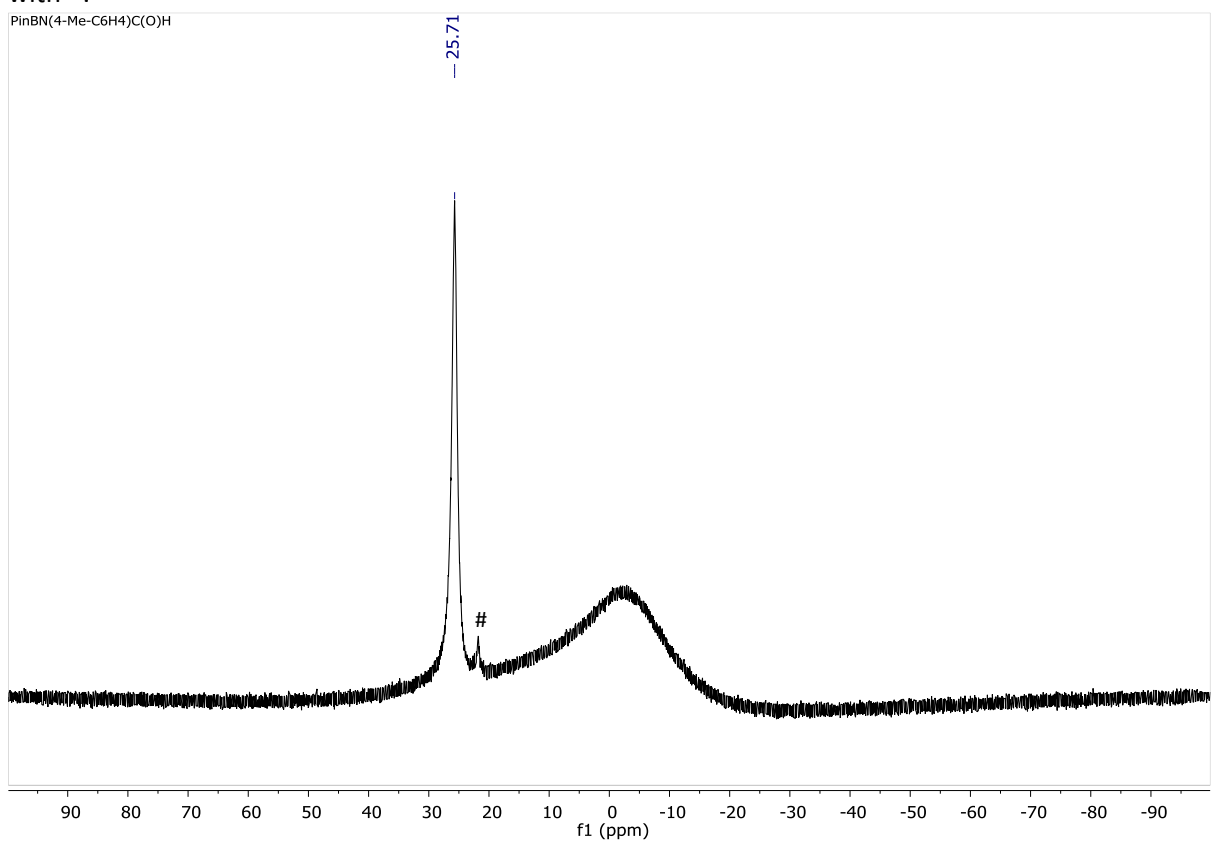

Figure S20:  $^{11}\text{B}$  NMR spectrum for PinBN(4-Me-C<sub>6</sub>H<sub>4</sub>)C(O)H, 1e, PinBOtBu indicated with #.

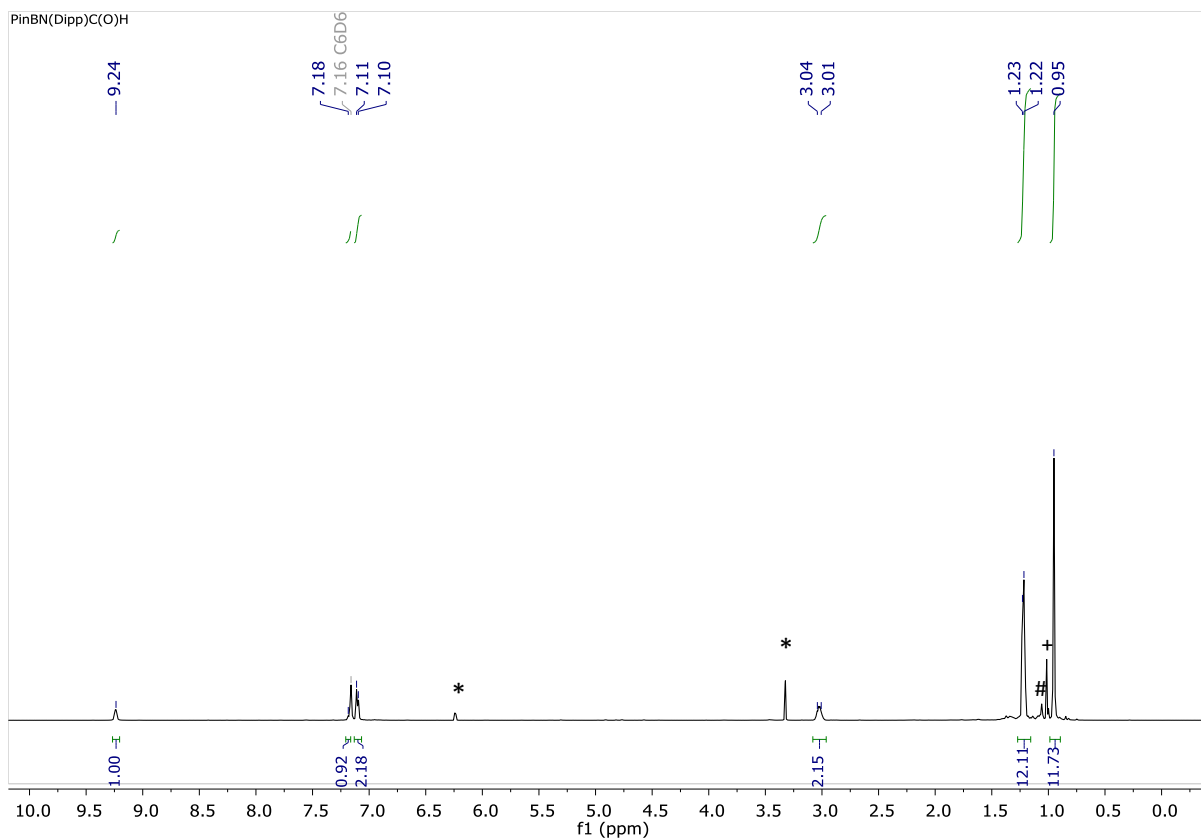

Figure S21:  $^1\text{H}$  NMR spectrum for PinBN(Dipp)C(O)H, 1f.  $\text{C}_6\text{H}_3(\text{OMe})_3$  internal standard indicated with \*, PinBOtBu indicated with #, HBPIn marked with +.

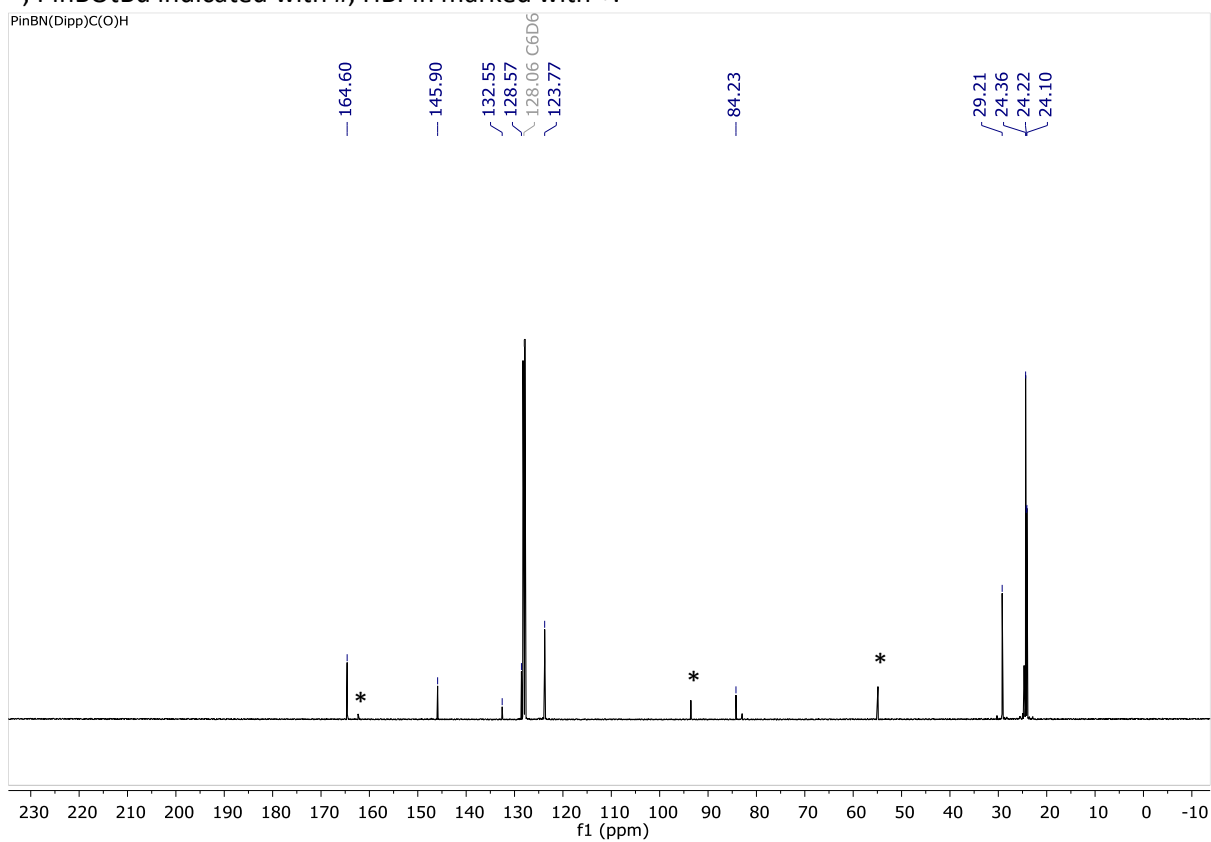

Figure S22:  $^{13}\text{C}$  NMR spectrum for PinBN(Dipp)C(O)H, 1f.  $\text{C}_6\text{H}_3(\text{OMe})_3$  internal standard indicated with \*.

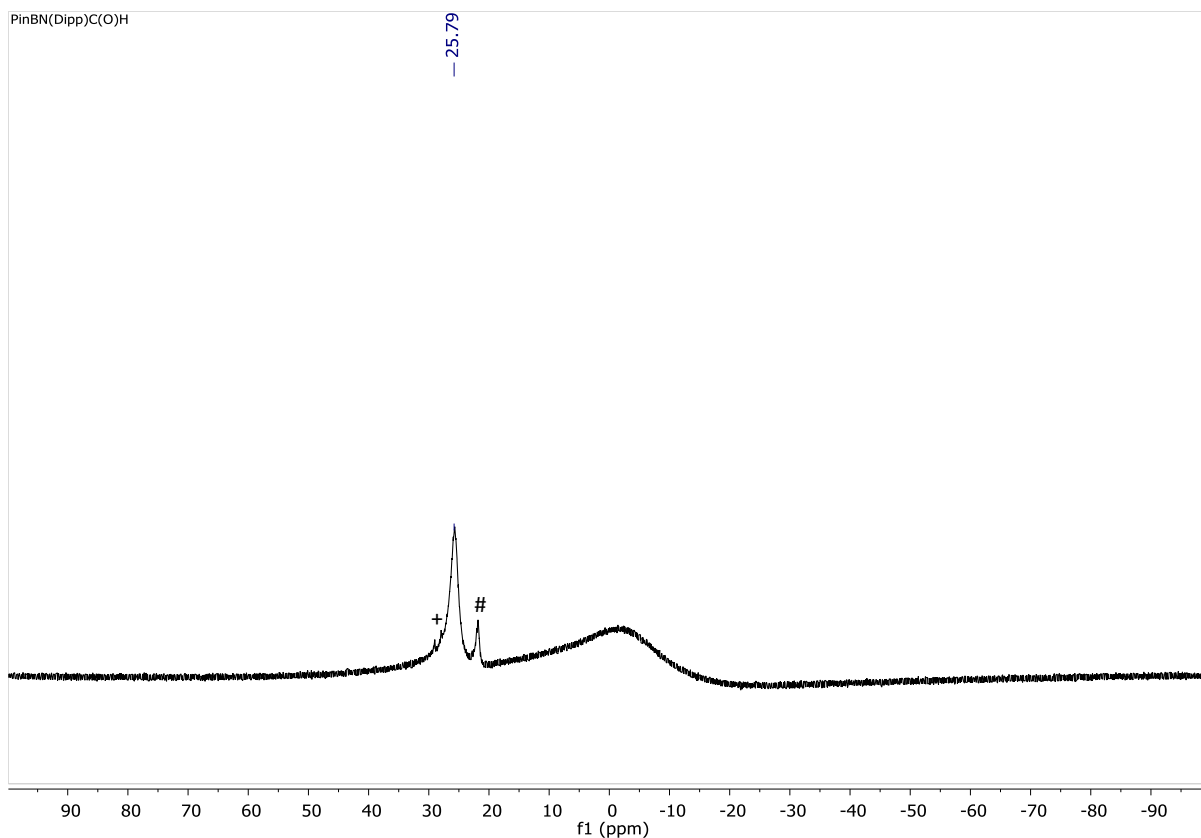

Figure S23:  $^{11}\text{B}$  NMR spectrum for PinBN(Dipp)C(O)H, 1f, PinBOtBu indicated with #, HBPIn marked with +.

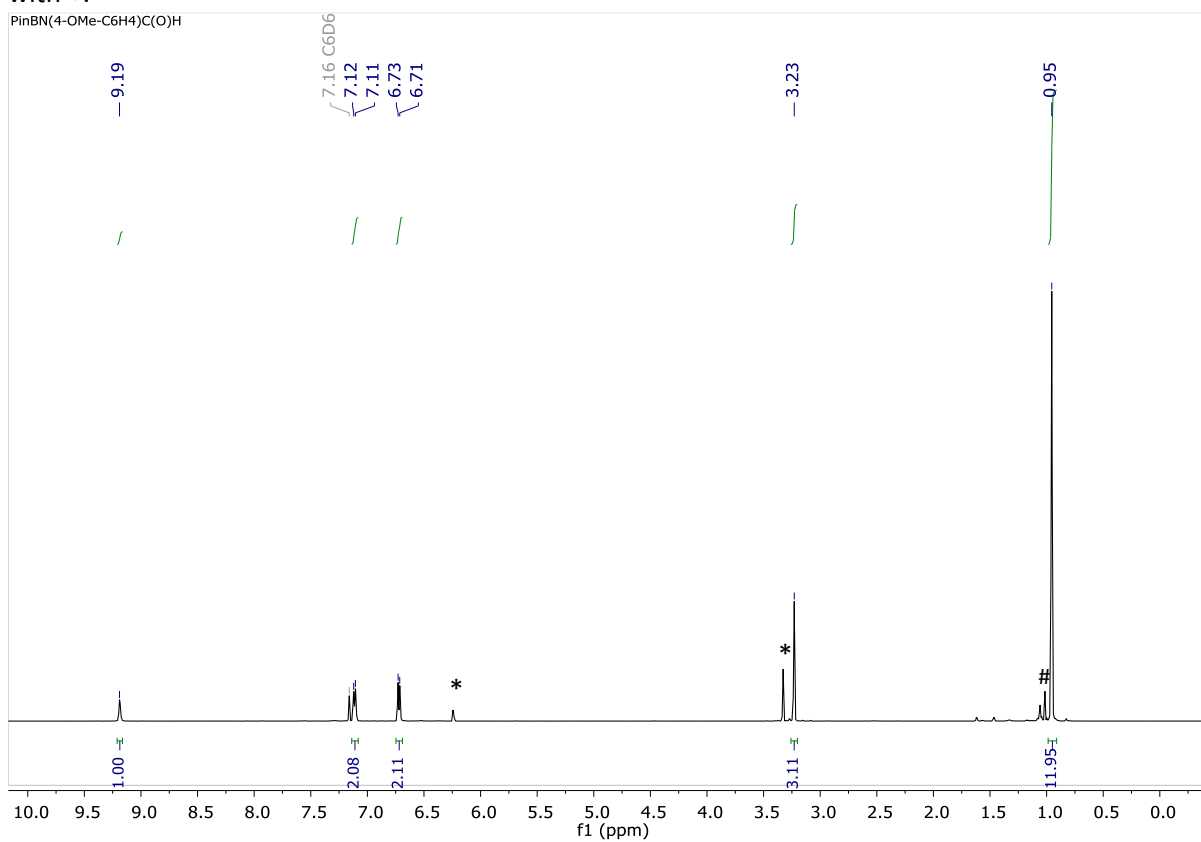

Figure S24:  $^1\text{H}$  NMR spectrum for PinBN(4-MeO-C<sub>6</sub>H<sub>4</sub>)C(O)H, 1g. C<sub>6</sub>H<sub>3</sub>(OMe)<sub>3</sub> internal standard indicated with \*, PinBOtBu indicated with #.

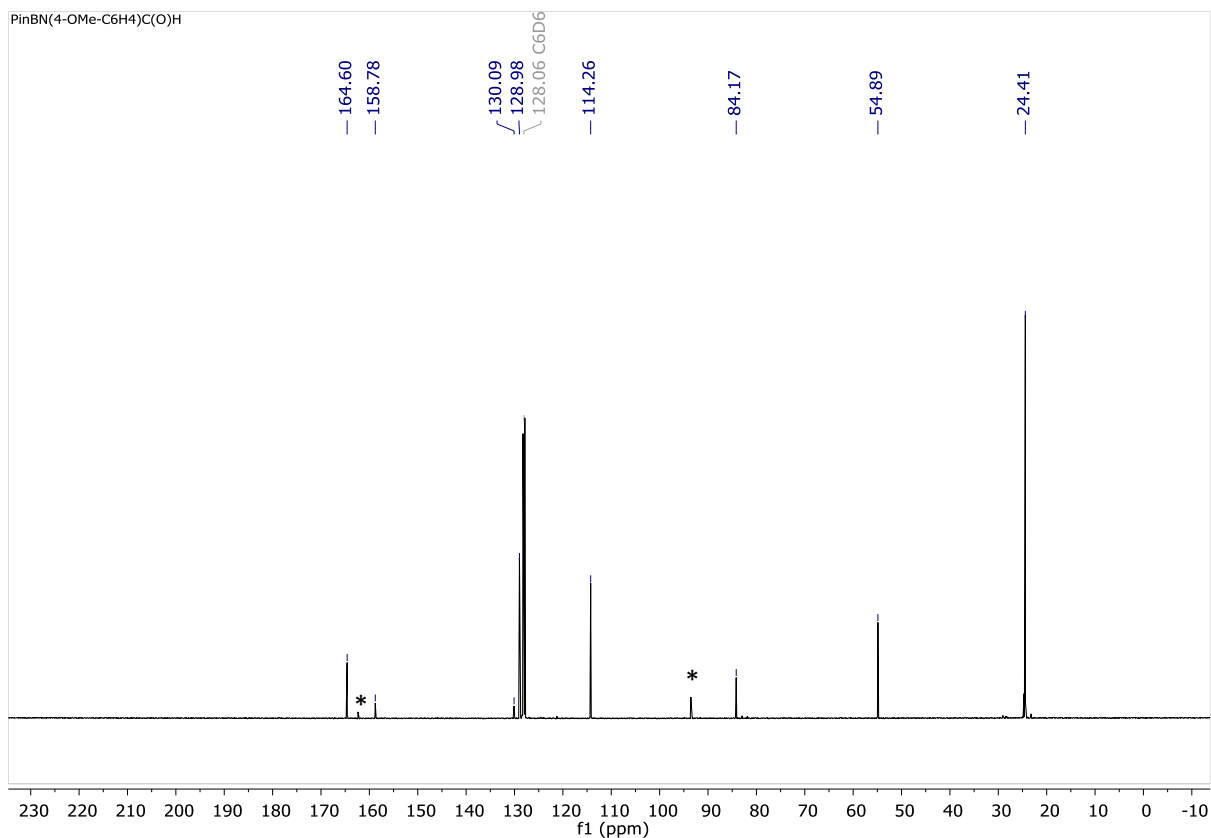

Figure S25:  $^{13}\text{C}$  NMR spectrum for PinBN(4-MeO-C<sub>6</sub>H<sub>4</sub>)C(O)H, 1g. C<sub>6</sub>H<sub>3</sub>(OMe)<sub>3</sub> internal standard indicated with \*.

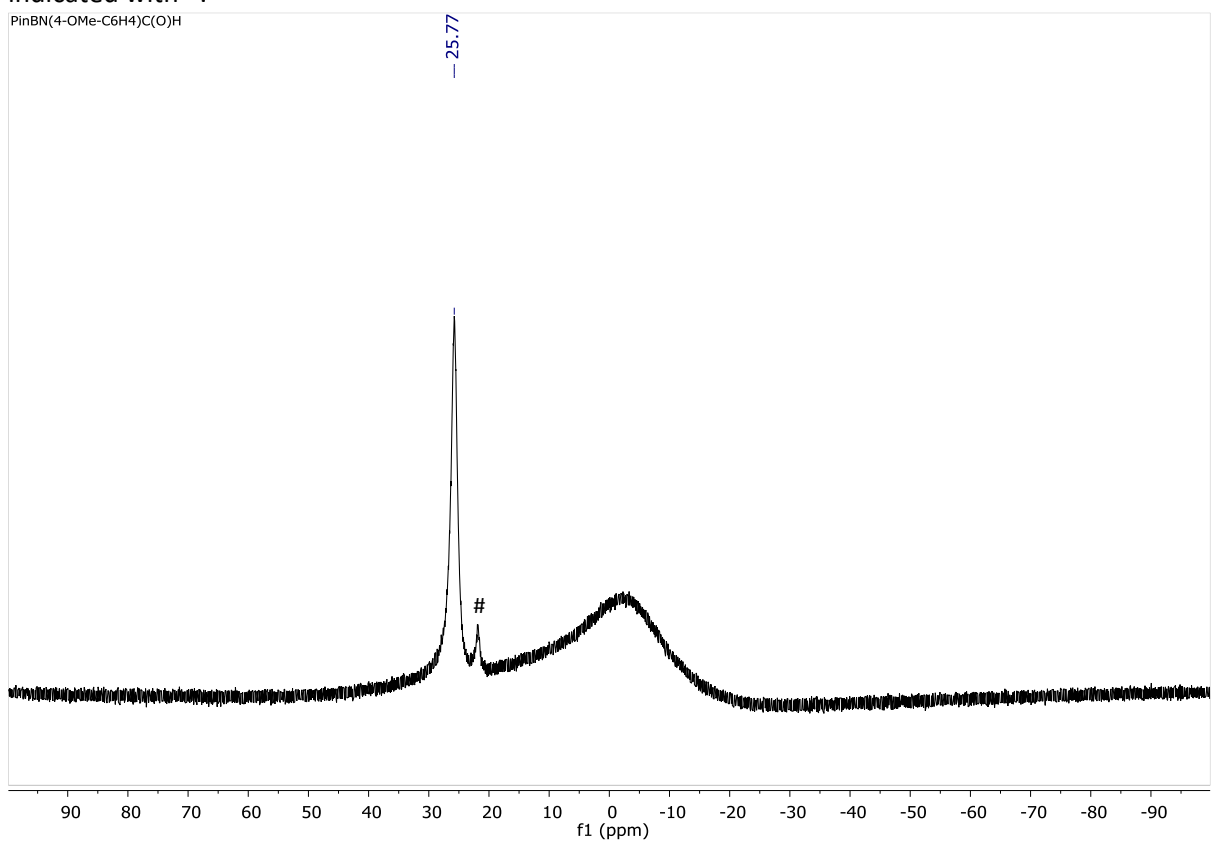

Figure S26:  $^{11}\text{B}$  NMR spectrum for PinBN(4-MeO-C<sub>6</sub>H<sub>4</sub>)C(O)H, 1g, PinBOtBu indicated with #.

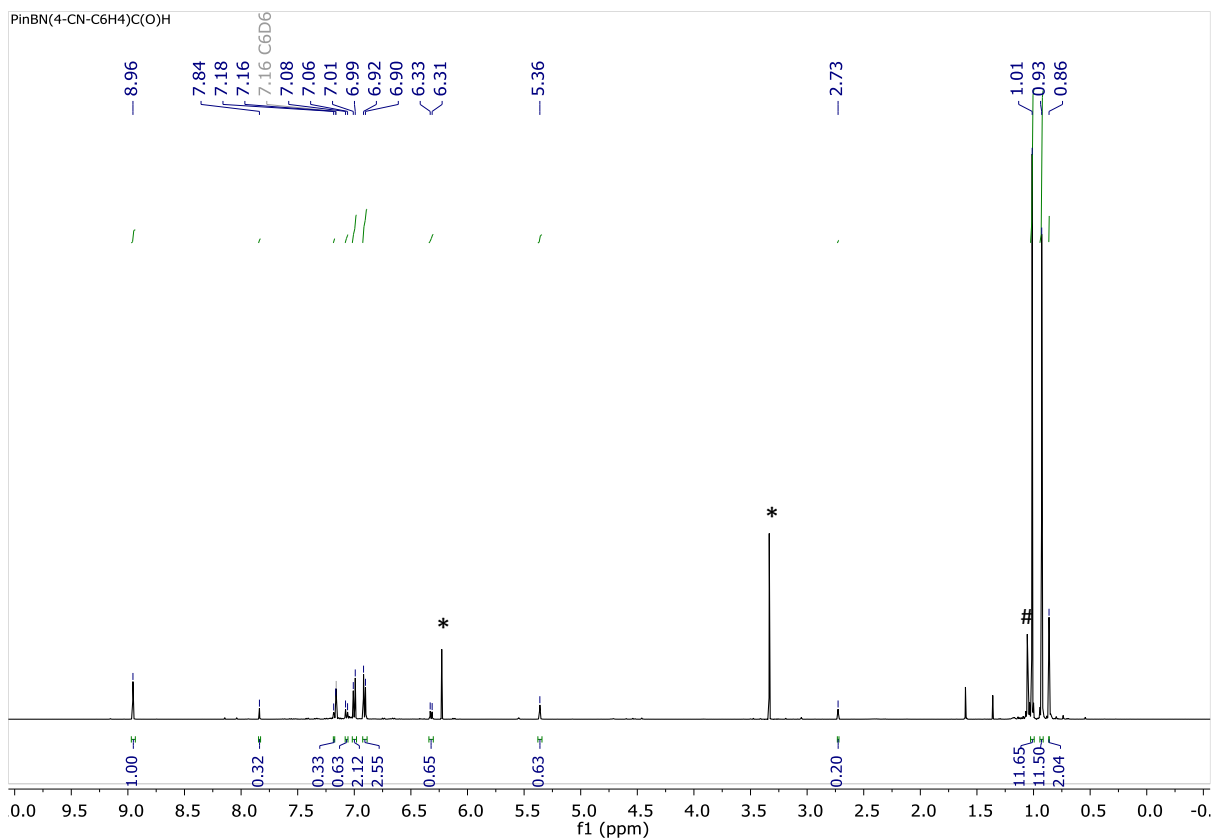

Figure S27:  $^1\text{H}$  NMR spectrum for PinBN(4-NC-C<sub>6</sub>H<sub>4</sub>)C(O)H, 1h, PinBN(4-NC-C<sub>6</sub>H<sub>4</sub>)CH<sub>3</sub>, 1h' and PinBN(4-CH<sub>2</sub>N(BPin)<sub>2</sub>-C<sub>6</sub>H<sub>4</sub>)C(O)H, 1h''. C<sub>6</sub>H<sub>3</sub>(OMe)<sub>3</sub> internal standard indicated with \*, PinBOTBu indicated with #.

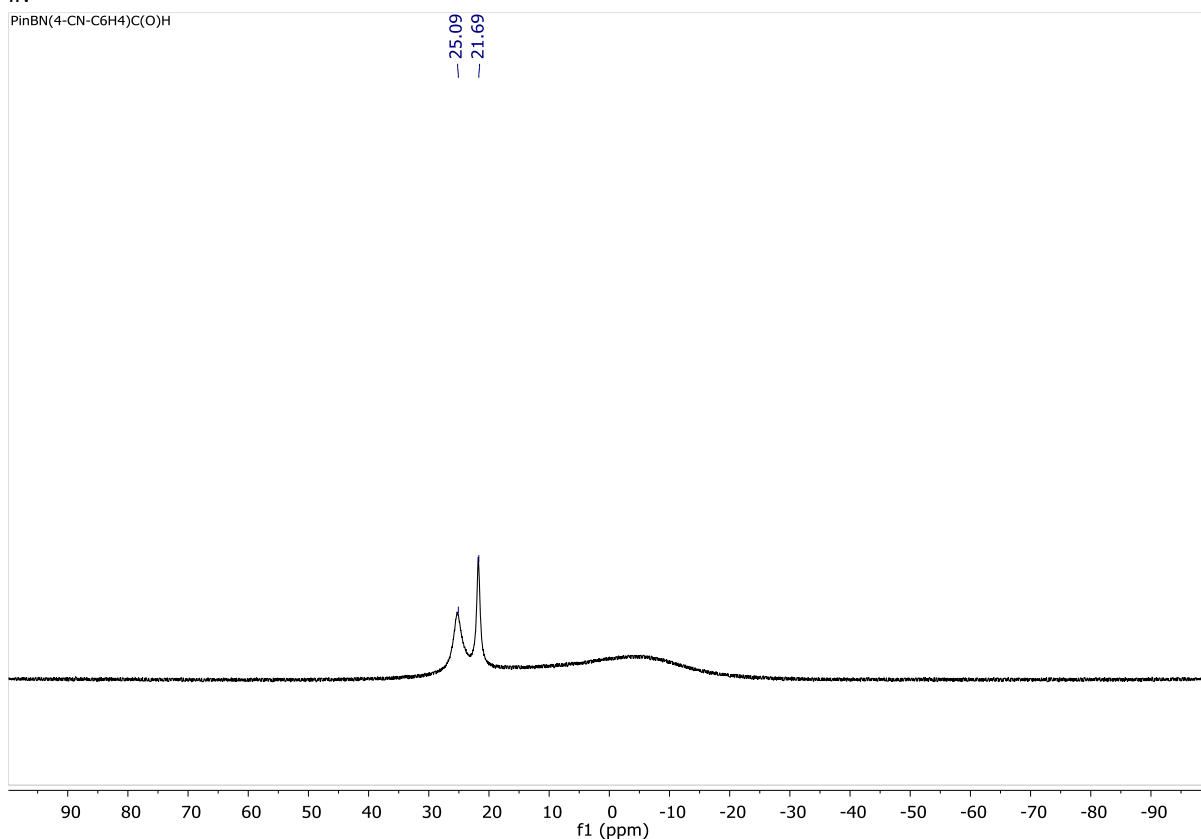

Figure S28:  $^{11}\text{B}$  NMR spectrum for PinBN(4-NC-C<sub>6</sub>H<sub>4</sub>)C(O)H, 1h, PinBN(4-NC-C<sub>6</sub>H<sub>4</sub>)CH<sub>3</sub>, 1h' and PinBN(4-CH<sub>2</sub>N(BPin)<sub>2</sub>-C<sub>6</sub>H<sub>4</sub>)C(O)H, 1h''.

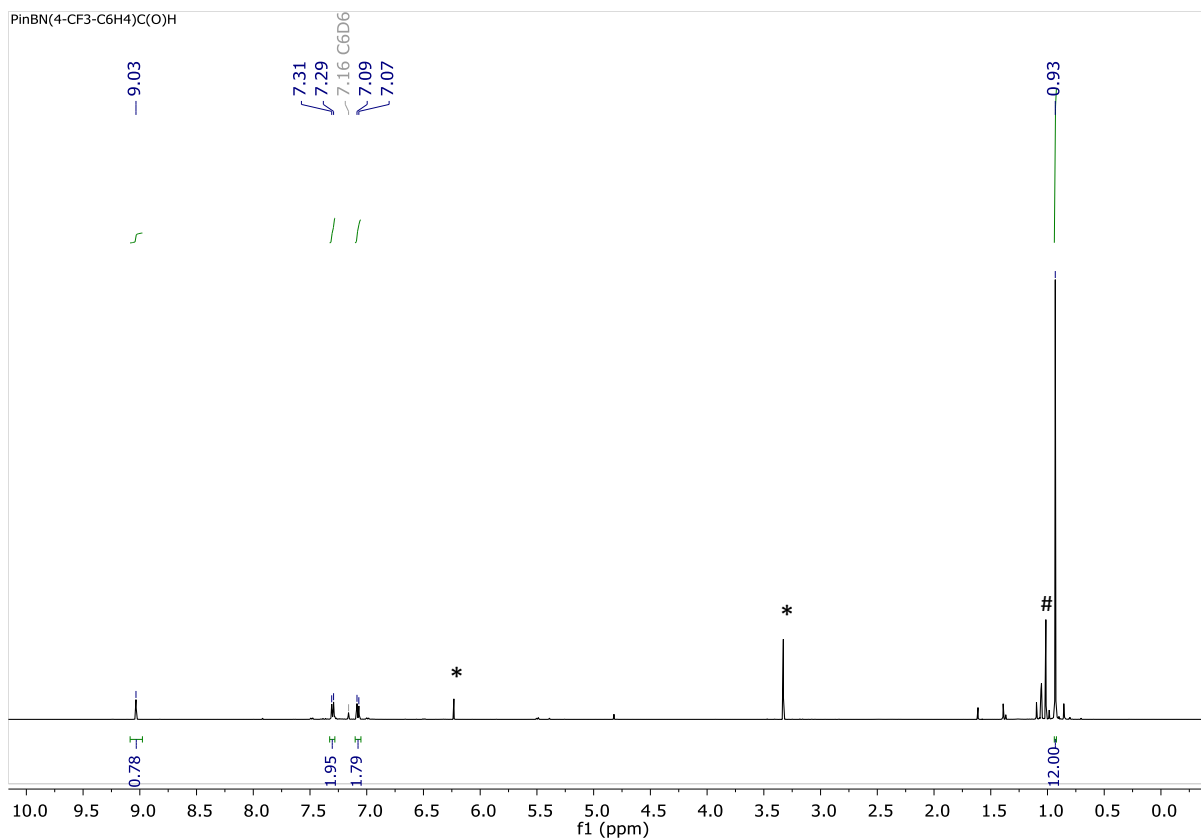

Figure S29:  $^1\text{H}$  NMR spectrum for PinBN(4- $\text{CF}_3$ - $\text{C}_6\text{H}_4$ )C(O)H, 1i.  $\text{C}_6\text{H}_3(\text{OMe})_3$  internal standard indicated with \*, PinBotBu indicated with #.

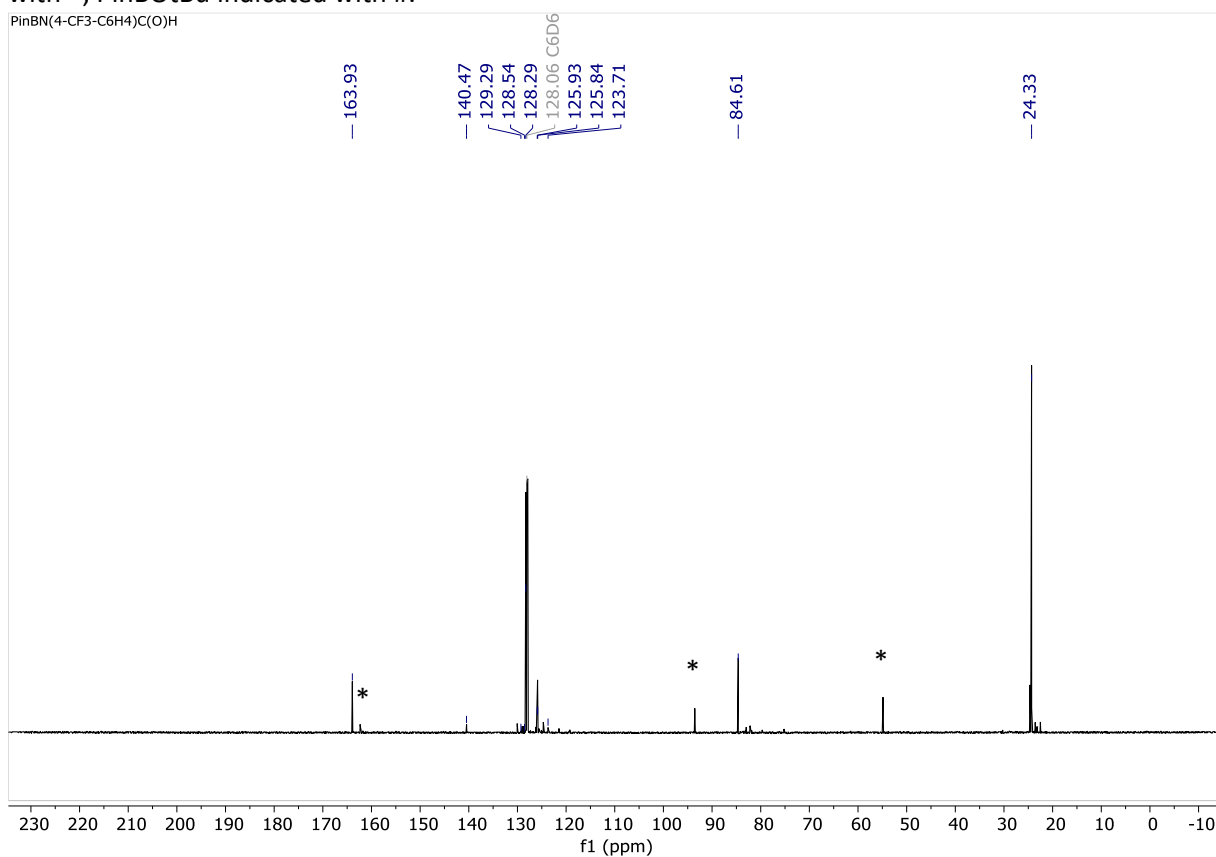

Figure S30:  $^{13}\text{C}$  NMR spectrum for PinBN(4- $\text{CF}_3$ - $\text{C}_6\text{H}_4$ )C(O)H, 1i.  $\text{C}_6\text{H}_3(\text{OMe})_3$  internal standard indicated with \*.



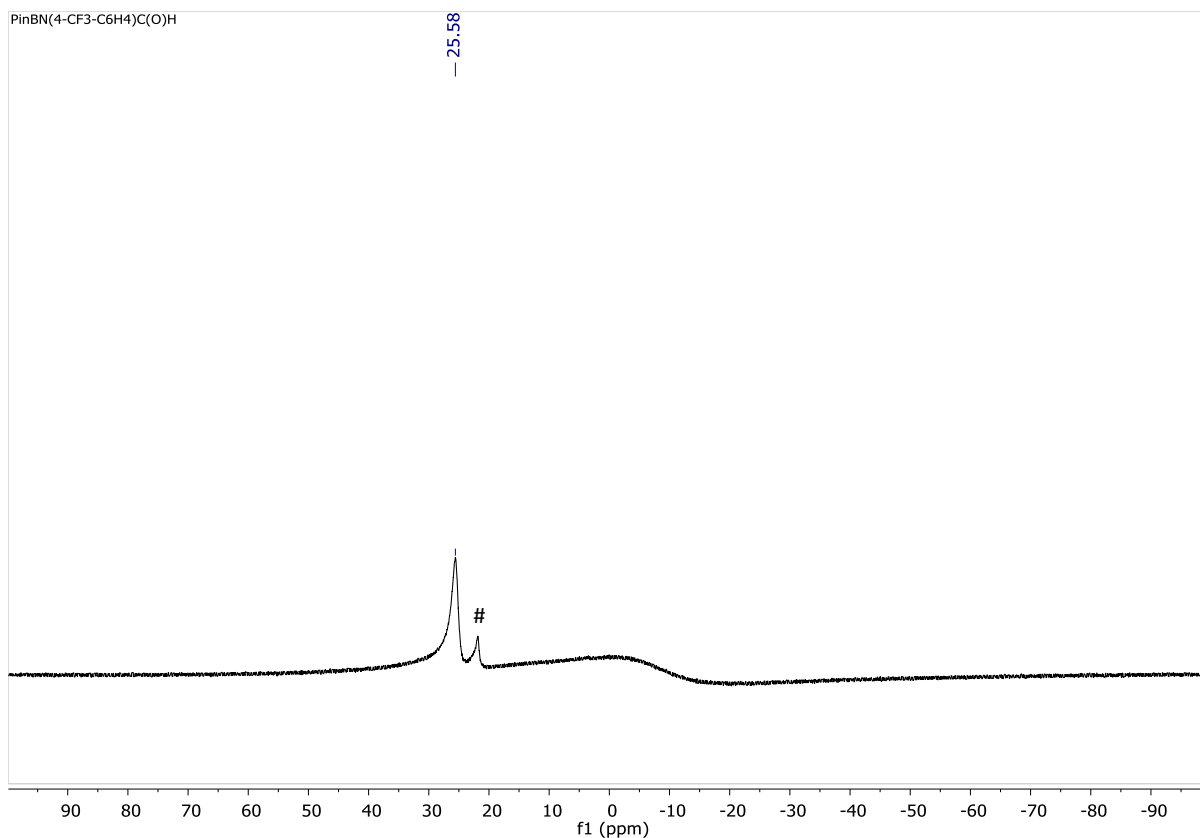

Figure S31: <sup>11</sup>B NMR spectrum for PinBN(4-CF<sub>3</sub>-C<sub>6</sub>H<sub>4</sub>)C(O)H, 1i, PinBOtBu indicated with #.

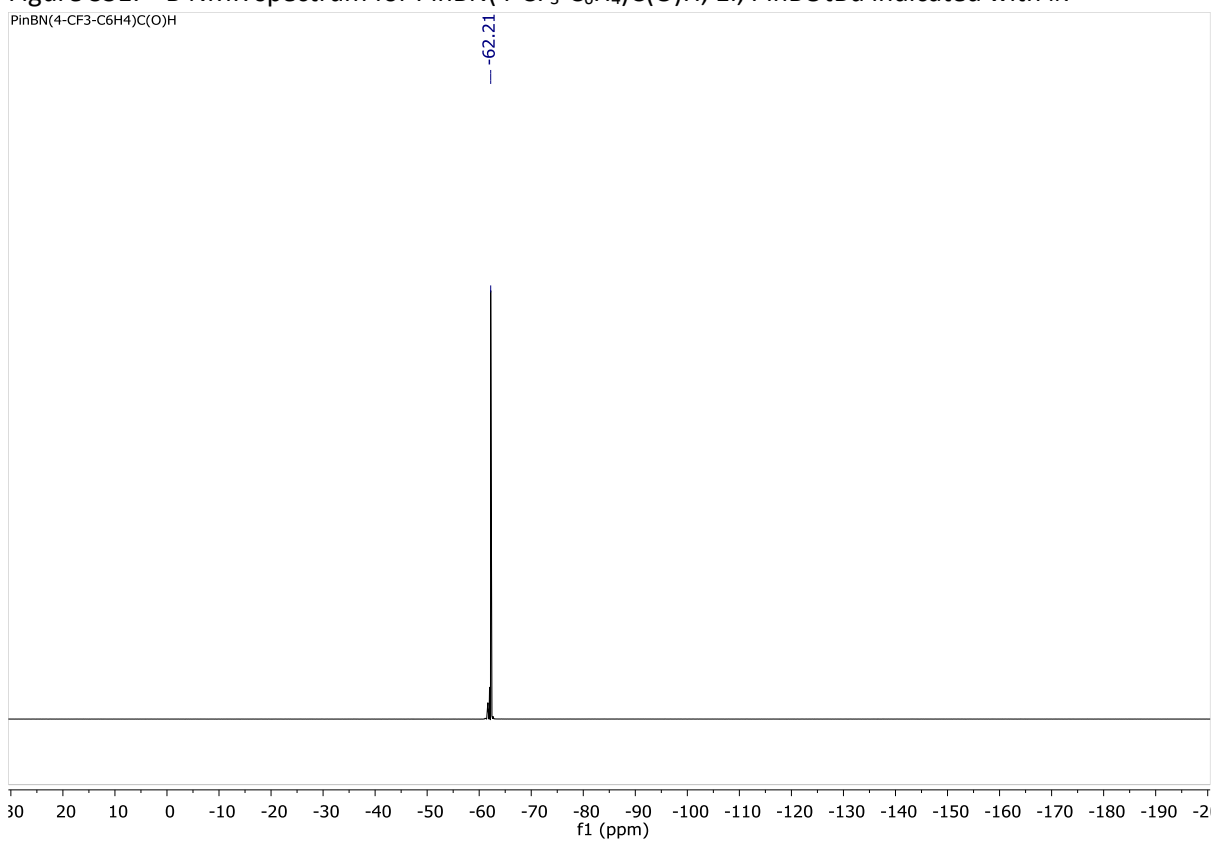

Figure S32: <sup>19</sup>F NMR spectrum for PinBN(4-CF<sub>3</sub>-C<sub>6</sub>H<sub>4</sub>)C(O)H, 1i.

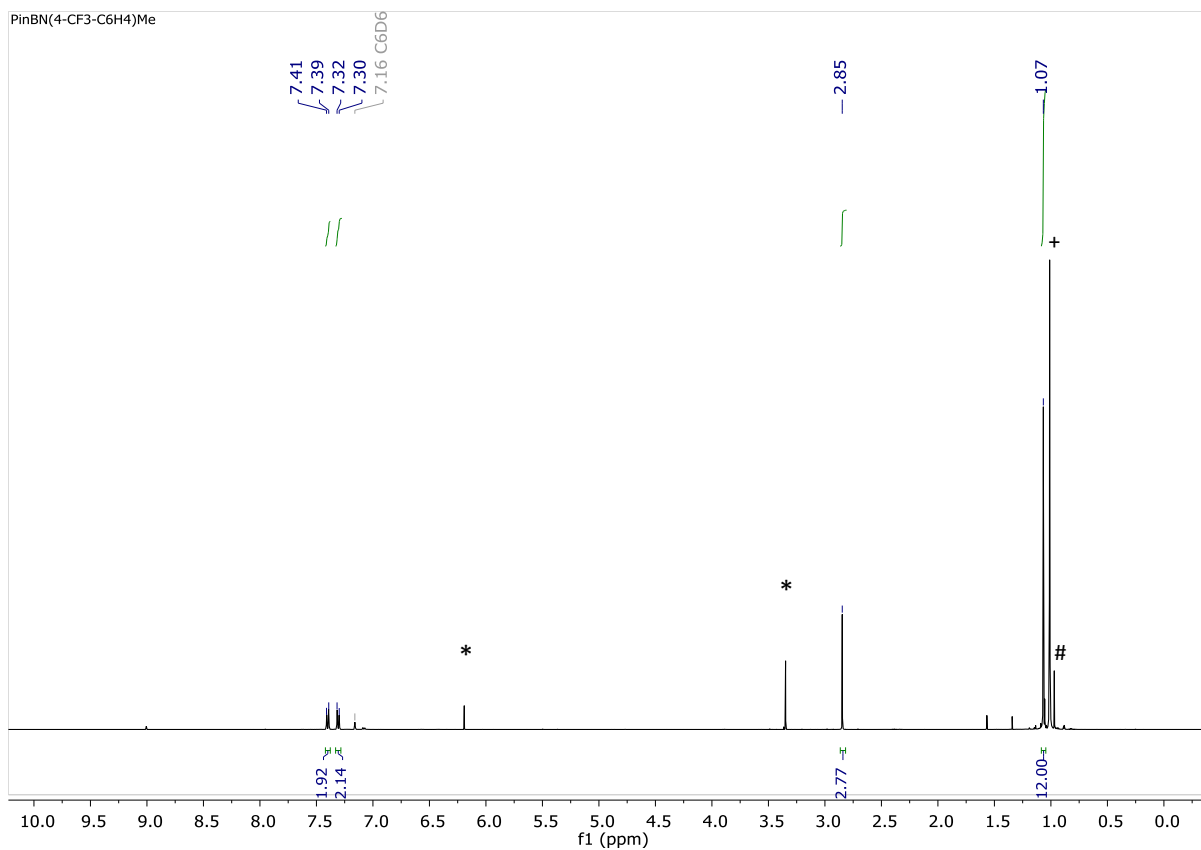

Figure S33:  $^1\text{H}$  NMR spectrum for PinBN(4- $\text{CF}_3\text{-C}_6\text{H}_4$ ) $\text{CH}_3$ ,  $1i'$ .  $\text{C}_6\text{H}_3(\text{OMe})_3$  internal standard indicated with \*, PinBOtBu indicated with #, PinBOBPIn marked with +.

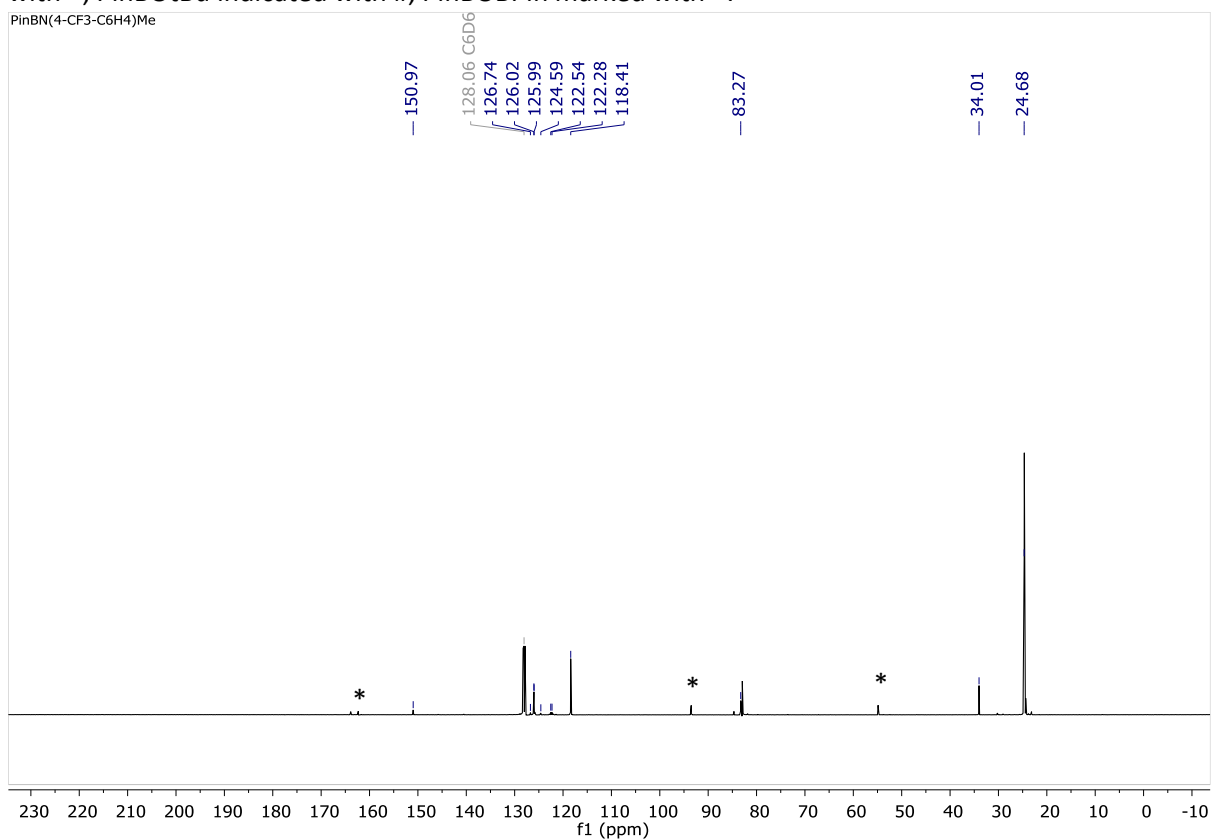

Figure S34:  $^{13}\text{C}$  NMR spectrum for PinBN(4- $\text{CF}_3\text{-C}_6\text{H}_4$ ) $\text{CH}_3$ ,  $1i'$ .  $\text{C}_6\text{H}_3(\text{OMe})_3$  internal standard indicated with \*.

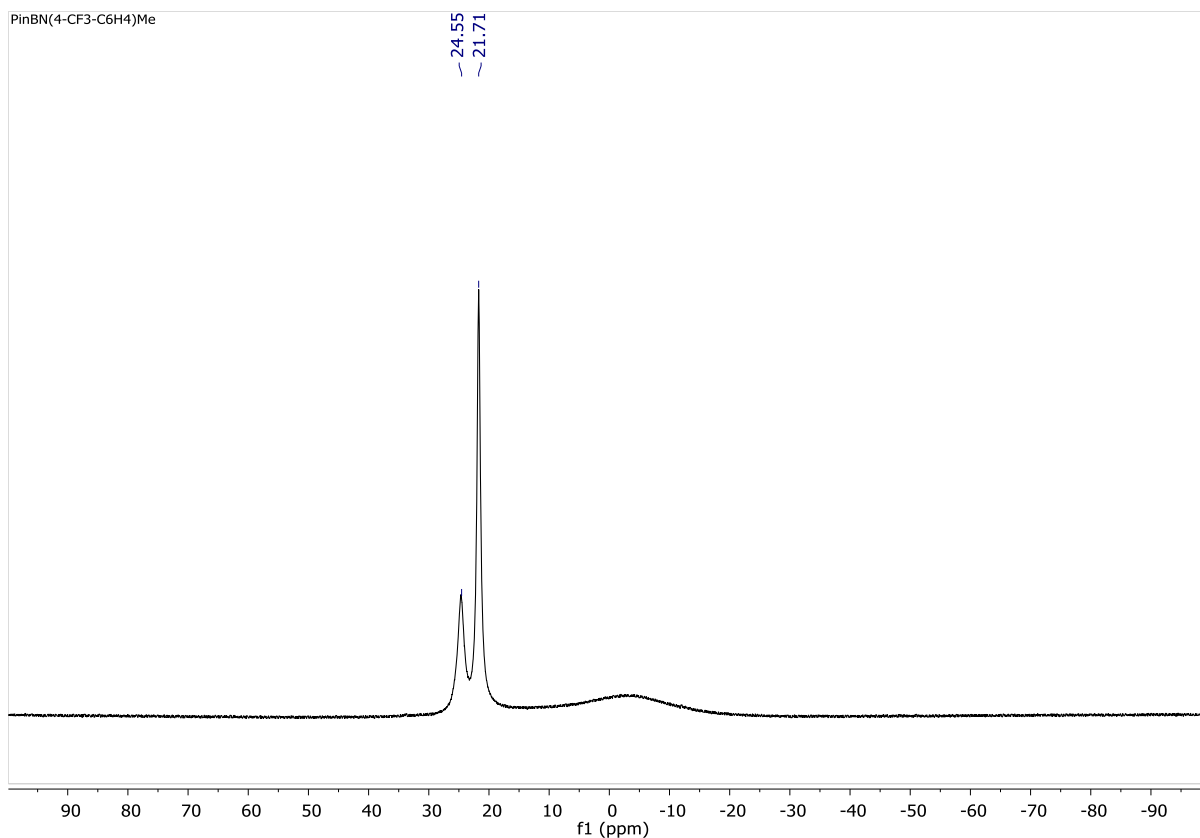

Figure S35: <sup>11</sup>B NMR spectrum for PinBN(4-CF<sub>3</sub>-C<sub>6</sub>H<sub>4</sub>)CH<sub>3</sub>, 1i'.

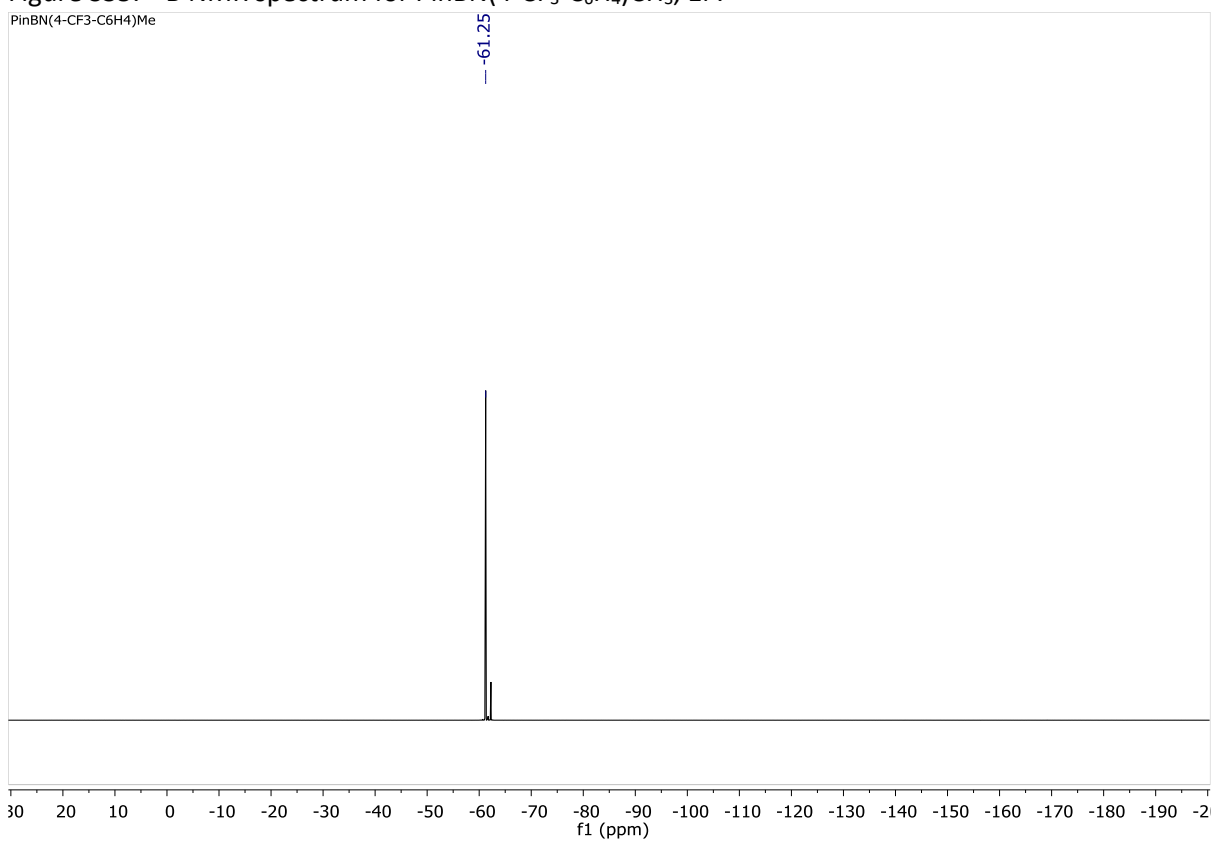

Figure S36: <sup>19</sup>F NMR spectrum for PinBN(4-CF<sub>3</sub>-C<sub>6</sub>H<sub>4</sub>)CH<sub>3</sub>, 1i'.

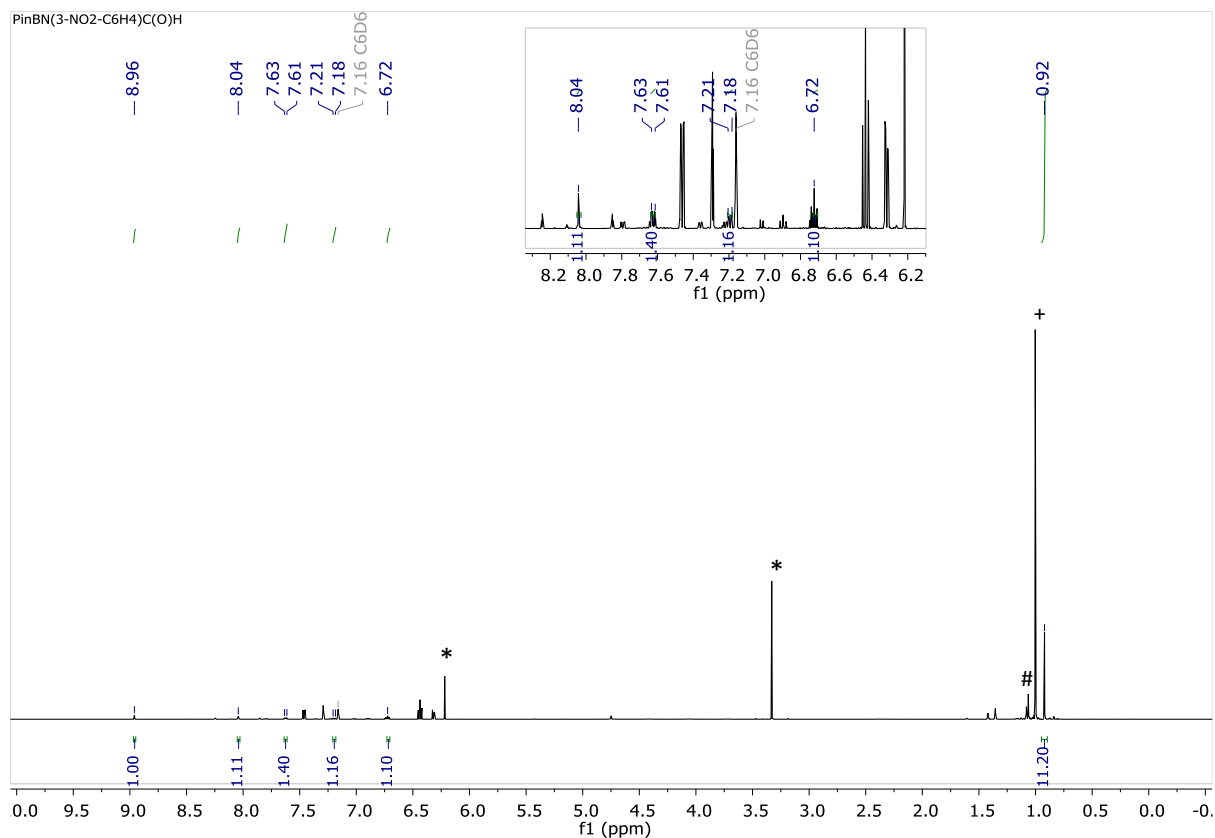

Figure S37:  $^1\text{H}$  NMR spectrum for PinBN(3-NO<sub>2</sub>-C<sub>6</sub>H<sub>4</sub>)C(O)H, **1j**, with inset showing expansion of the aromatic region. C<sub>6</sub>H<sub>3</sub>(OMe)<sub>3</sub> internal standard indicated with \*, PinBOtBu indicated with #, HBPin marked with +.

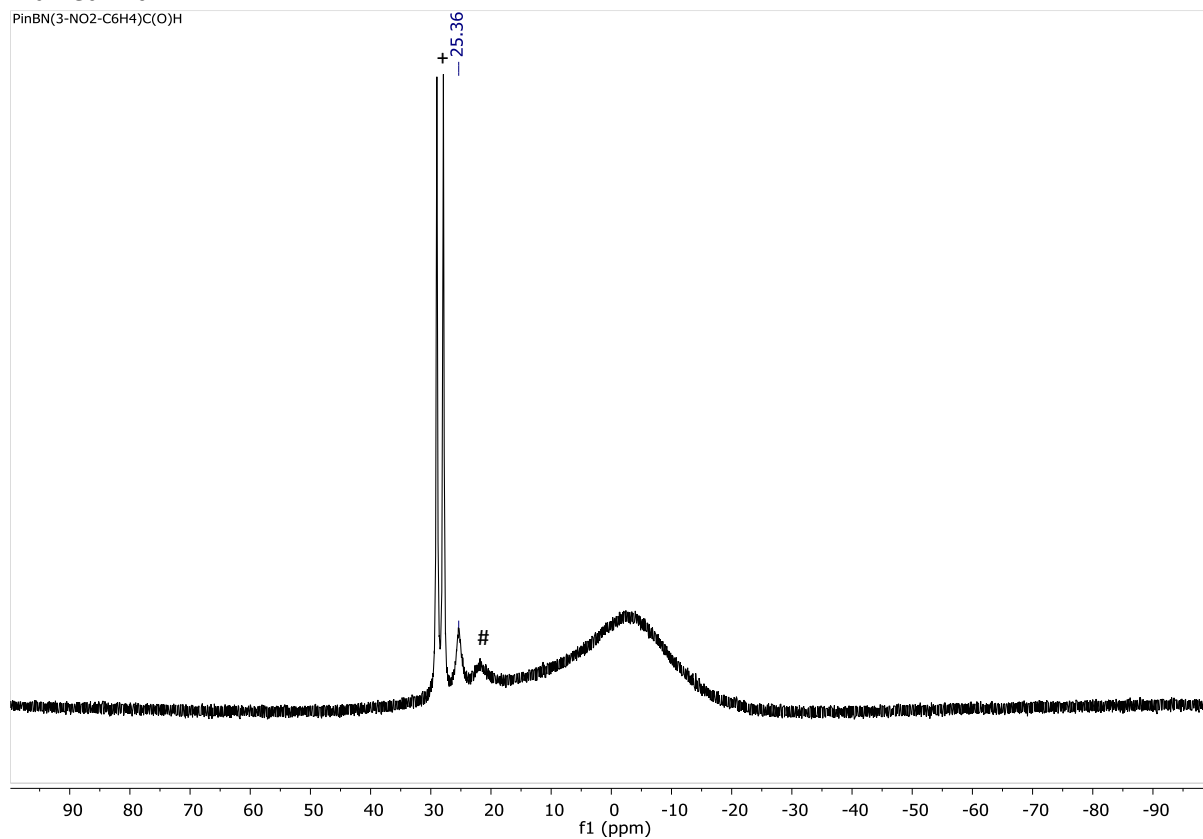

Figure S38:  $^{11}\text{B}$  NMR spectrum for PinBN(3-NO<sub>2</sub>-C<sub>6</sub>H<sub>4</sub>)C(O)H, **1j**, PinBOtBu indicated with #, HBPin marked with +.

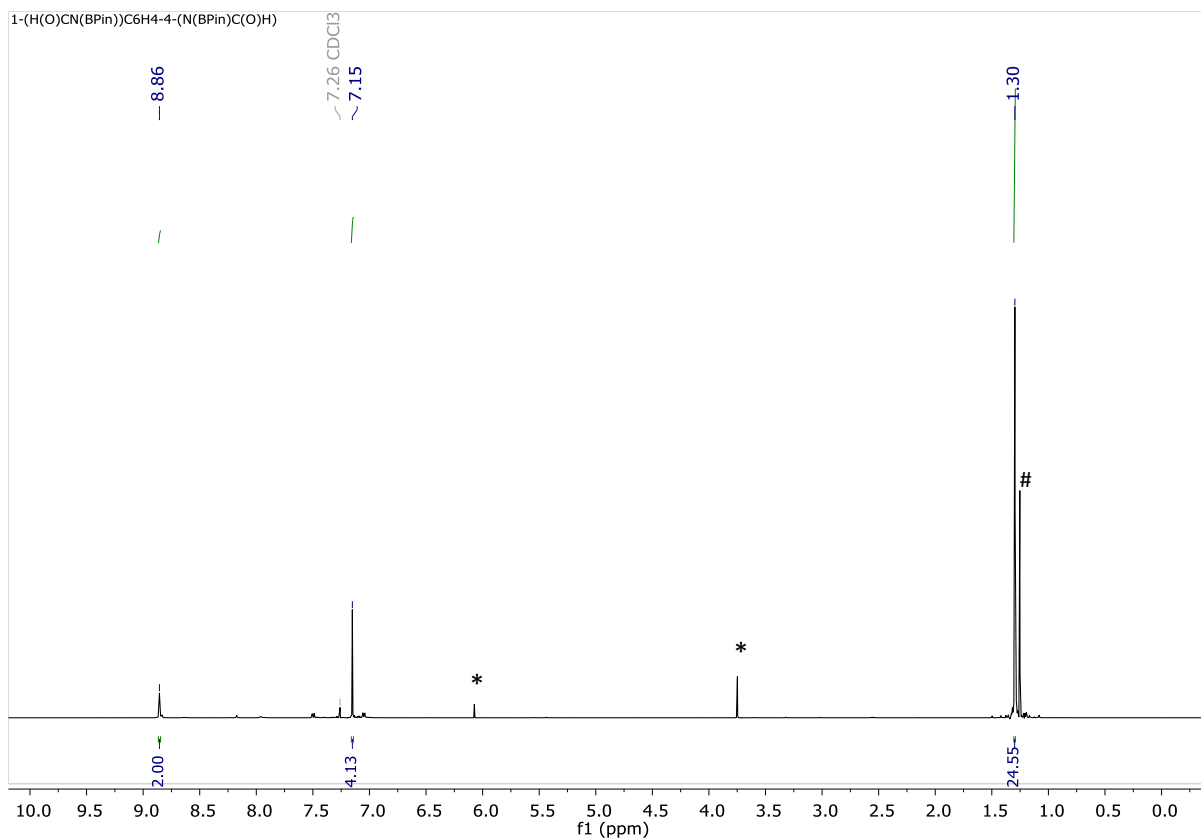

Figure S39: <sup>1</sup>H NMR spectrum for 1-(H(O)CN(BPin))C<sub>6</sub>H<sub>4</sub>-4-(N(BPin)C(O)H), 1k. C<sub>6</sub>H<sub>3</sub>(OMe)<sub>3</sub> internal standard indicated with \*, PinBOTu indicated with #.

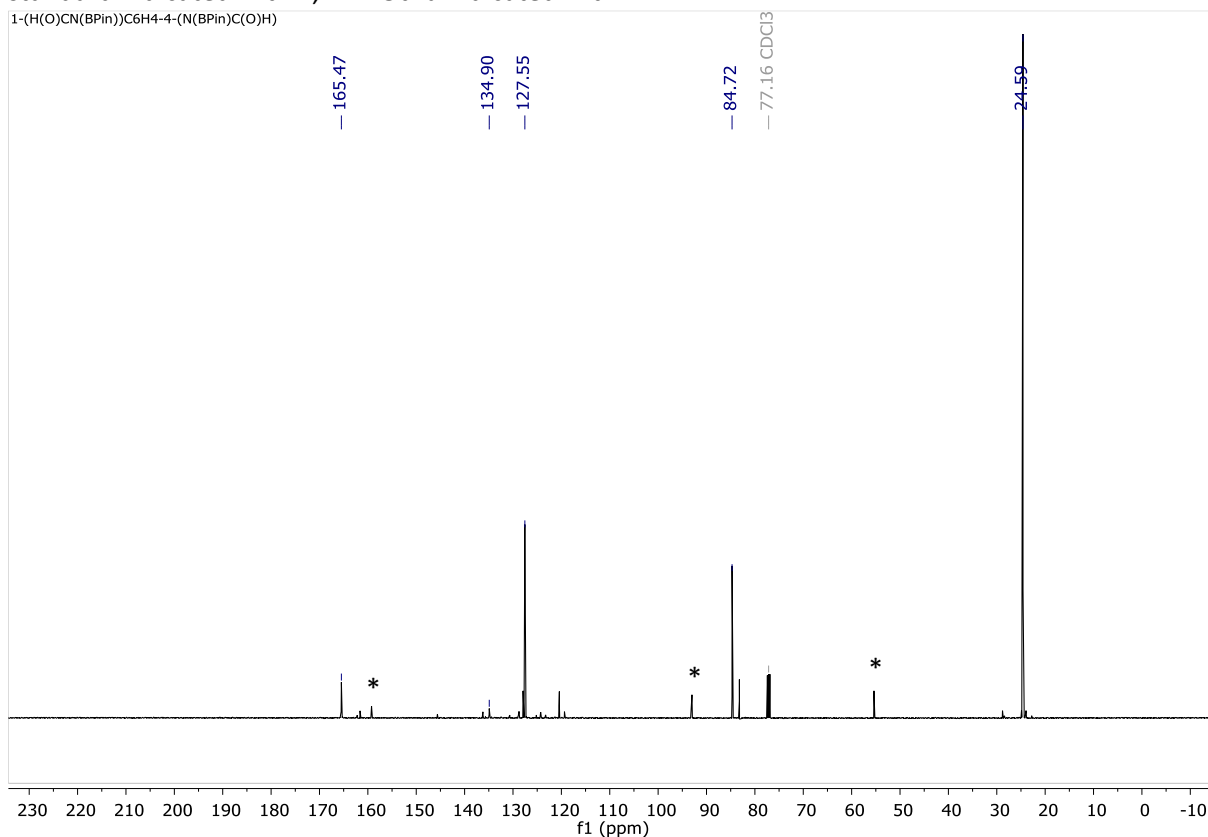

Figure S40: <sup>13</sup>C NMR spectrum for 1-(H(O)CN(BPin))C<sub>6</sub>H<sub>4</sub>-4-(N(BPin)C(O)H), 1k. C<sub>6</sub>H<sub>3</sub>(OMe)<sub>3</sub> internal standard indicated with \*.

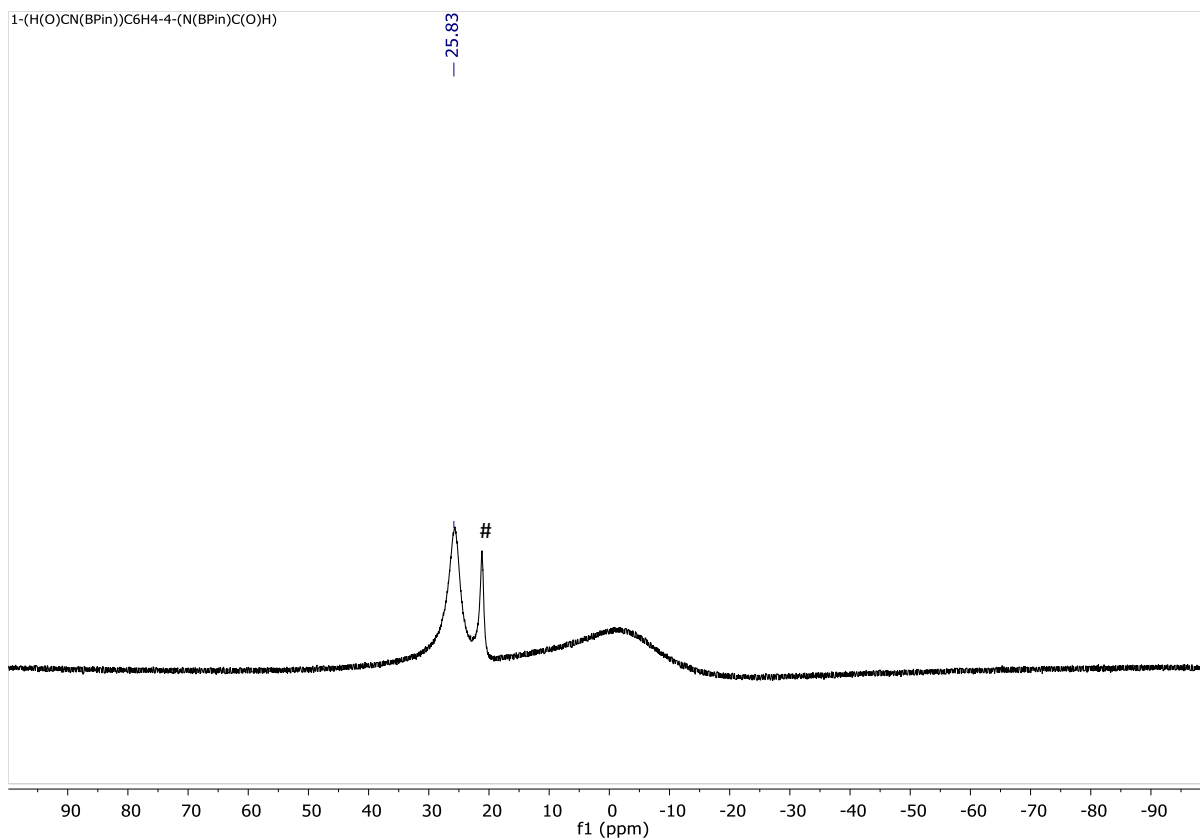

Figure S41: <sup>11</sup>B NMR spectrum for 1-(H(O)CN(BPin))C<sub>6</sub>H<sub>4</sub>-4-(N(BPin)C(O)H), 1k, PinBOTu indicated with #.

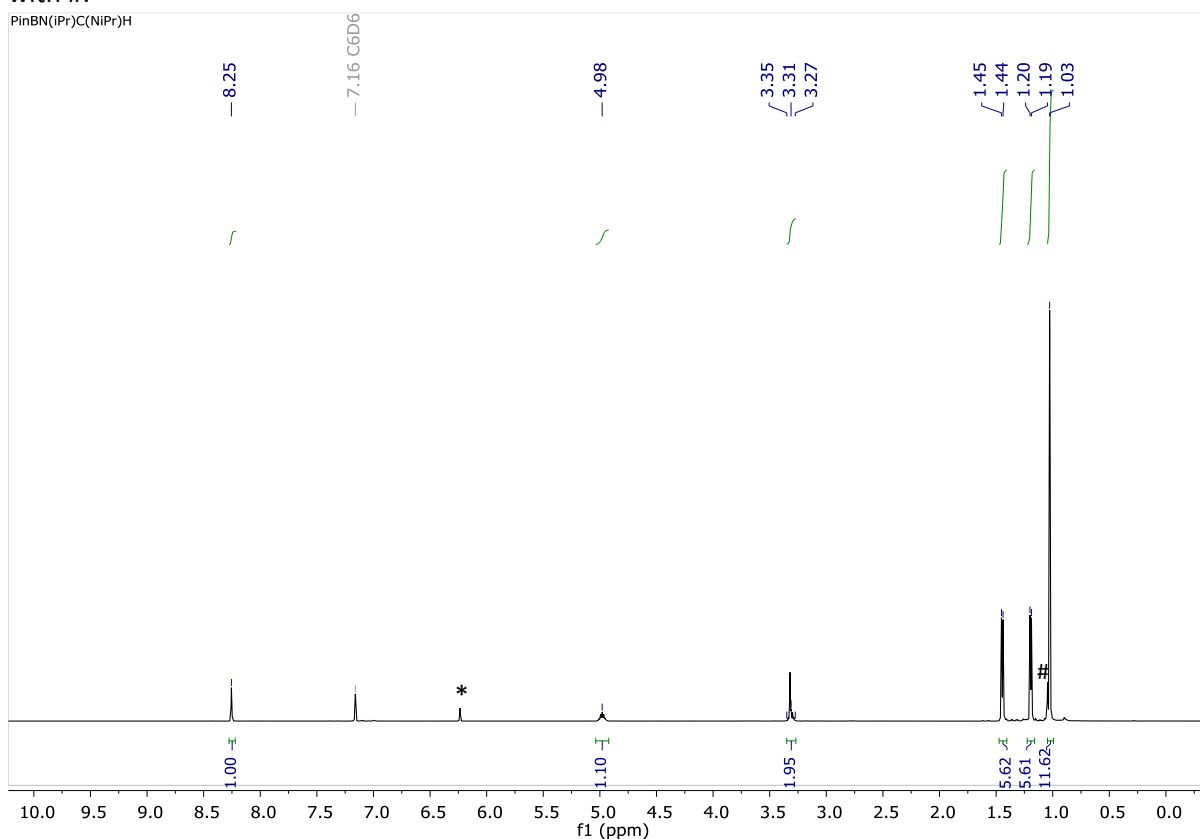

Figure S42: <sup>1</sup>H NMR spectrum for PinBN(iPr)C(NiPr)H, 3a. C<sub>6</sub>H<sub>3</sub>(OMe)<sub>3</sub> internal standard indicated with \*, PinBOTu indicated with #.

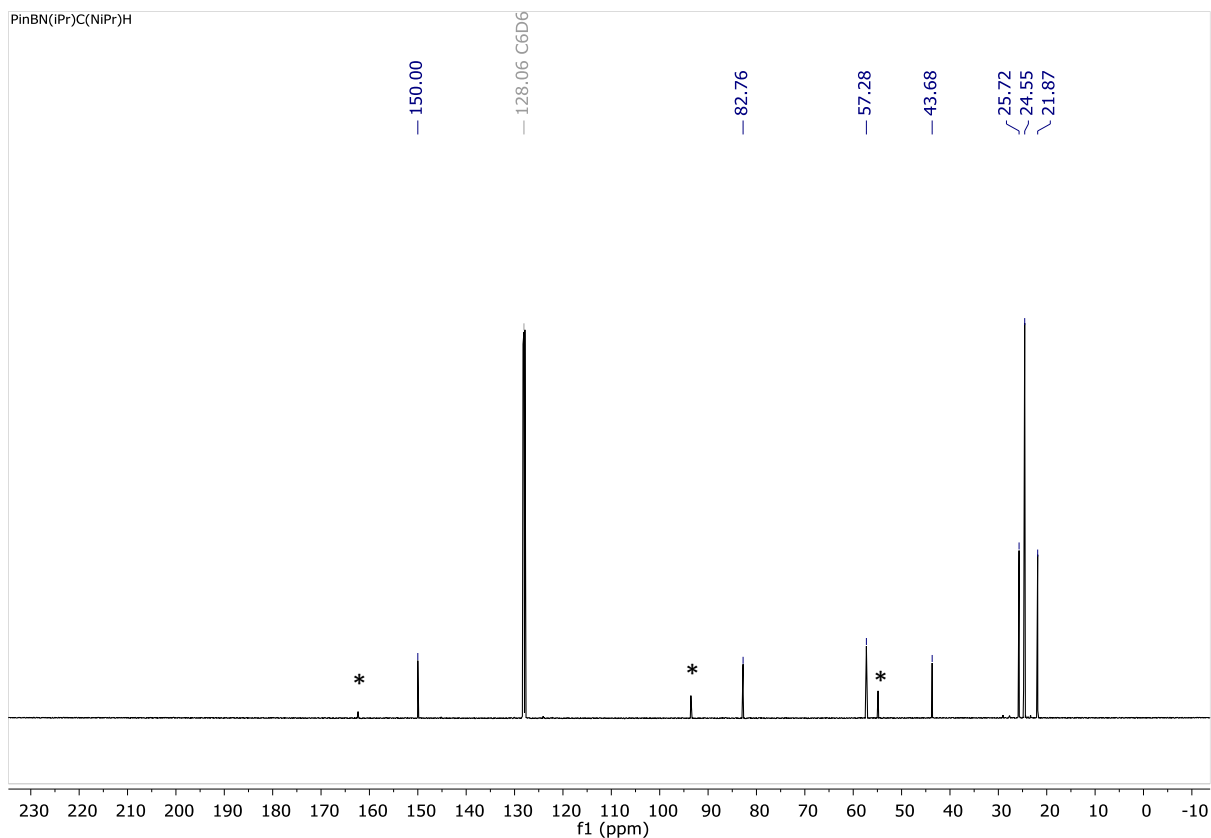

Figure S43:  $^{13}\text{C}$  NMR spectrum for PinBN(iPr)C(NiPr)H, 3a.  $\text{C}_6\text{H}_3(\text{OMe})_3$  internal standard indicated with \*.

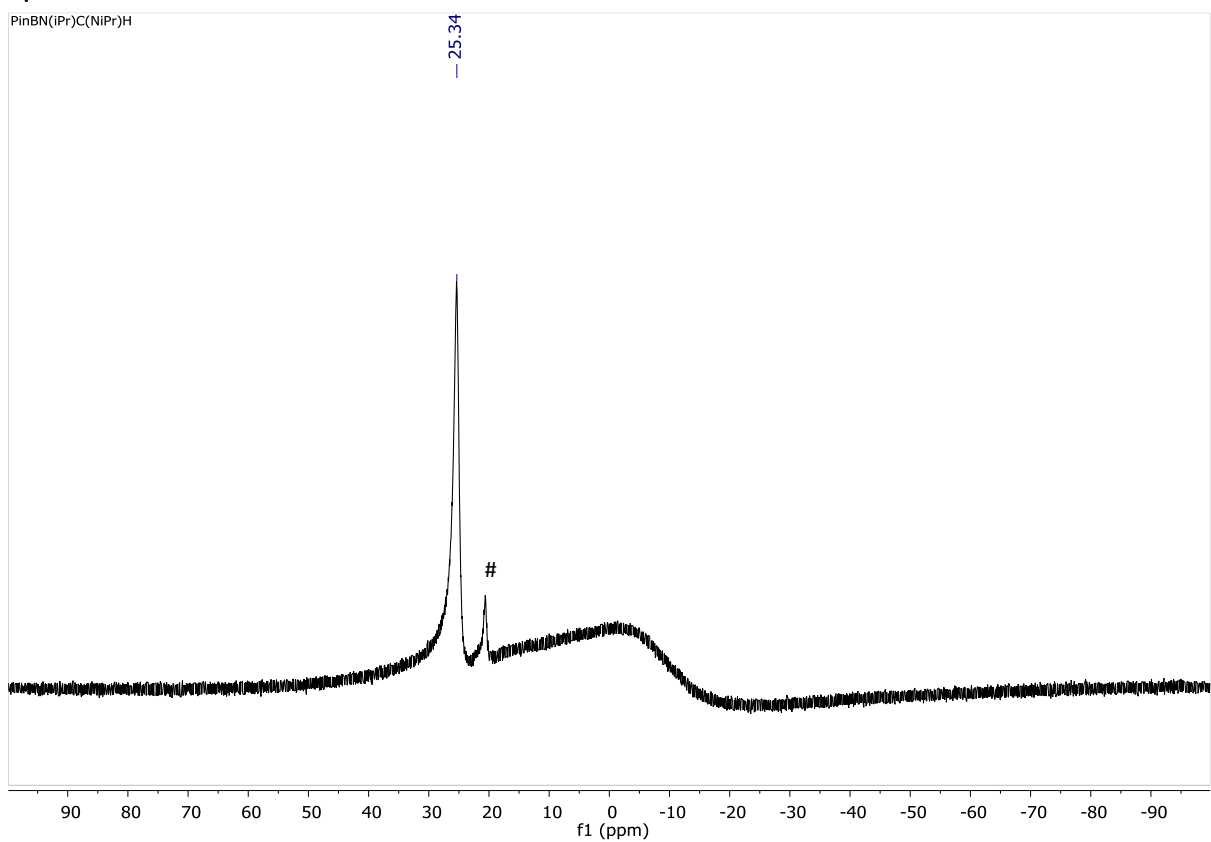

Figure S44:  $^{11}\text{B}$  NMR spectrum for PinBN(iPr)C(NiPr)H, 3a, PinBOtBu indicated with #.

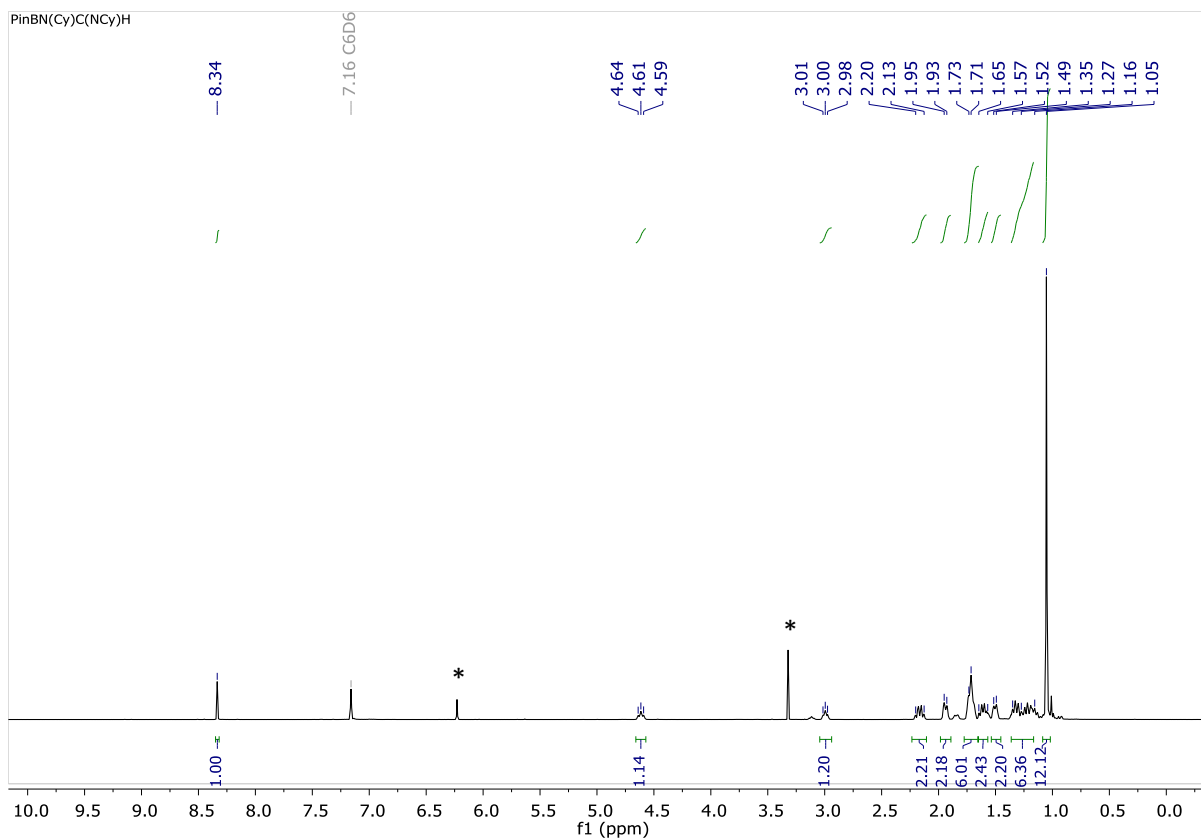

Figure S45:  $^1\text{H}$  NMR spectrum for PinBN(Cy)C(NCy)H, 3b.  $\text{C}_6\text{H}_3(\text{OMe})_3$  internal standard indicated with \*.

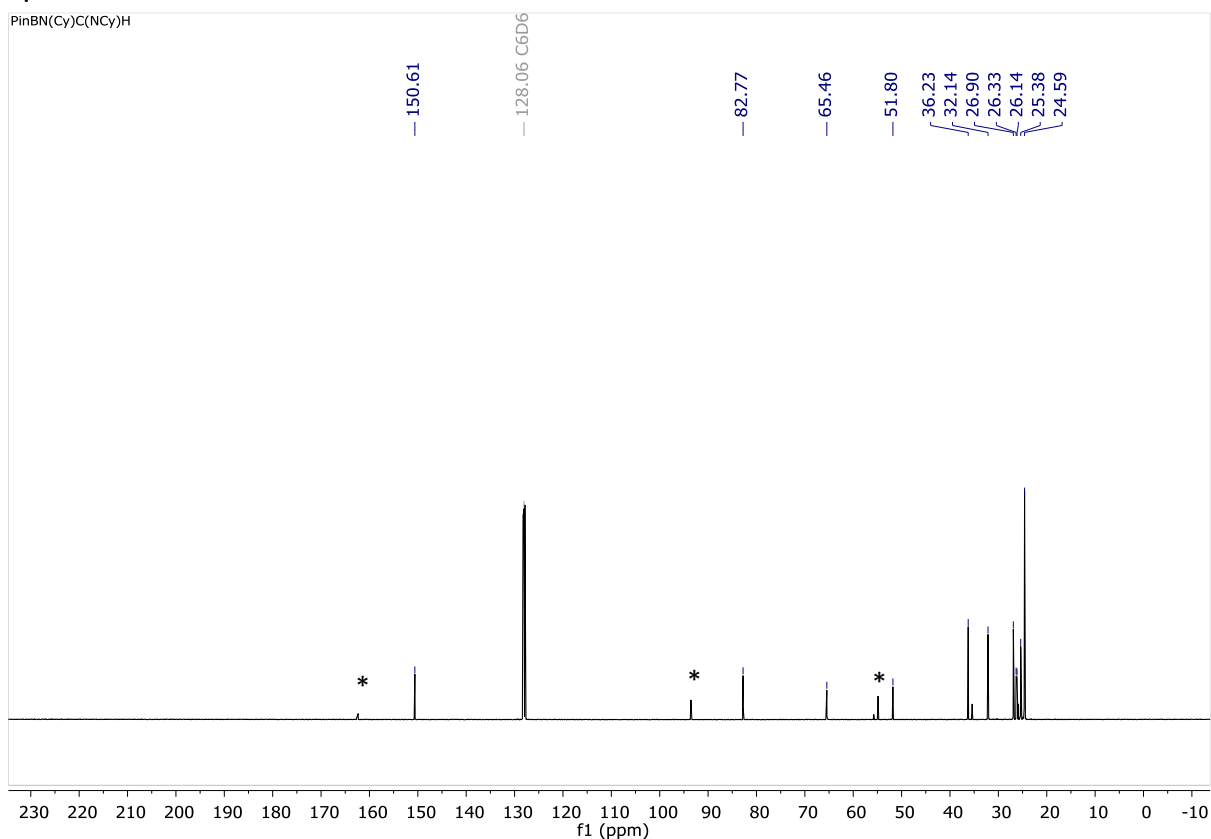

Figure S46:  $^{13}\text{C}$  NMR spectrum for PinBN(Cy)C(NCy)H, 3b.  $\text{C}_6\text{H}_3(\text{OMe})_3$  internal standard indicated with \*.



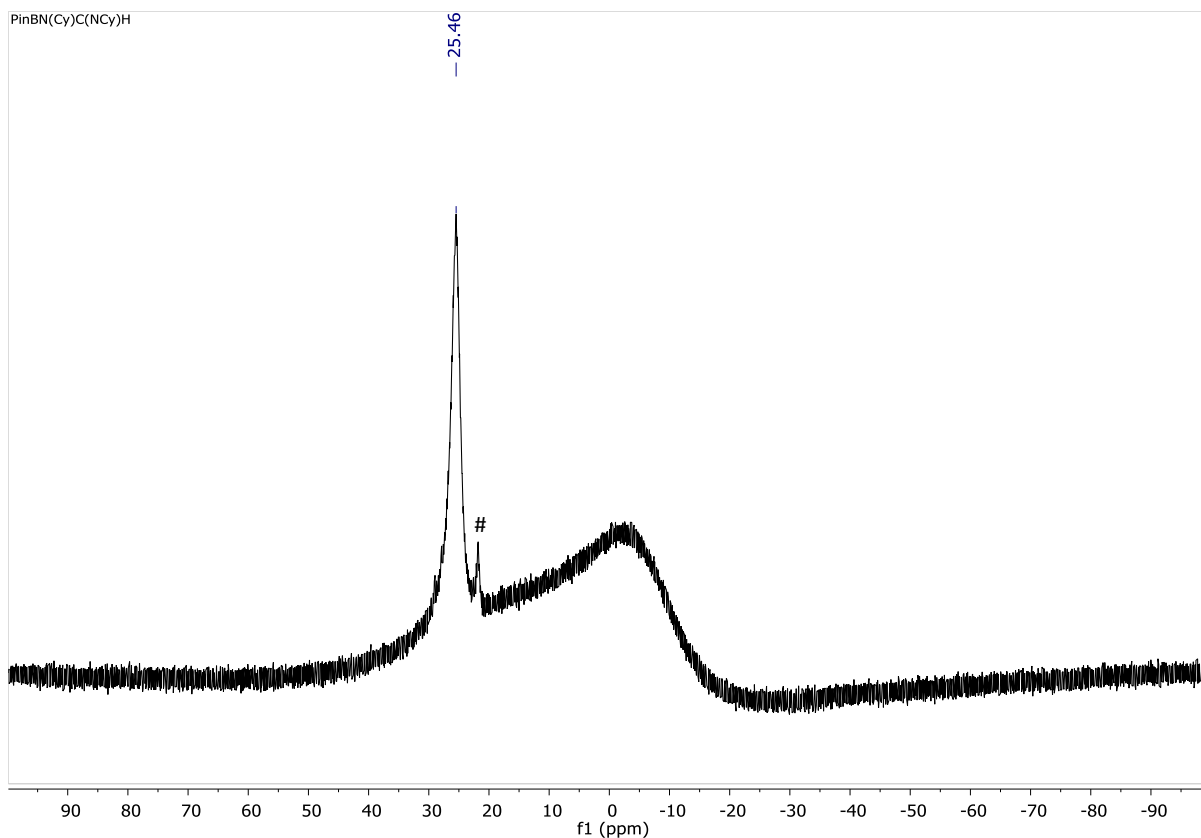

Figure S47:  $^{11}\text{B}$  NMR spectrum for PinBN(Cy)C(NCy)H, 3b, PinBOtBu indicated with #.

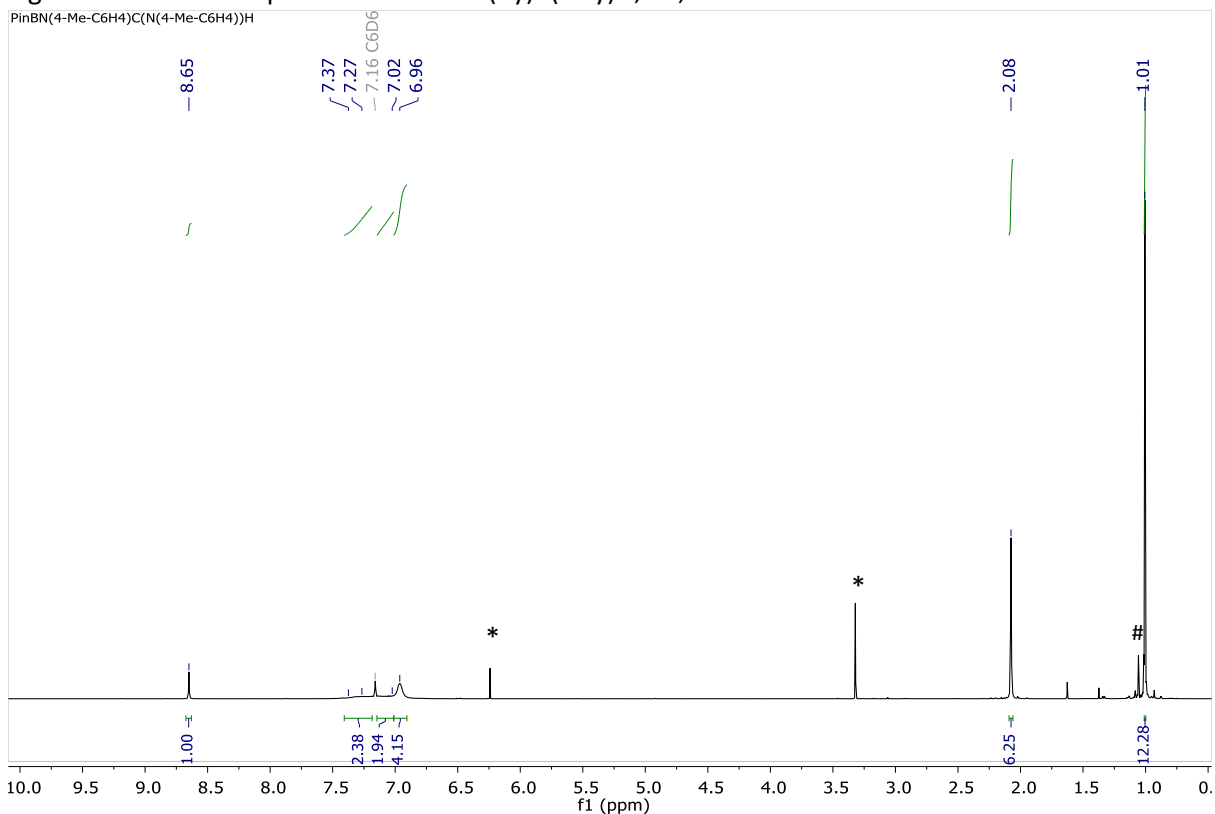

Figure S48:  $^1\text{H}$  NMR spectrum for PinBN(4-Me-C<sub>6</sub>H<sub>4</sub>)C(N(4-Me-C<sub>6</sub>H<sub>4</sub>))H, 3b. C<sub>6</sub>H<sub>3</sub>(OMe)<sub>3</sub> internal standard indicated with \*, PinBOtBu indicated with #.

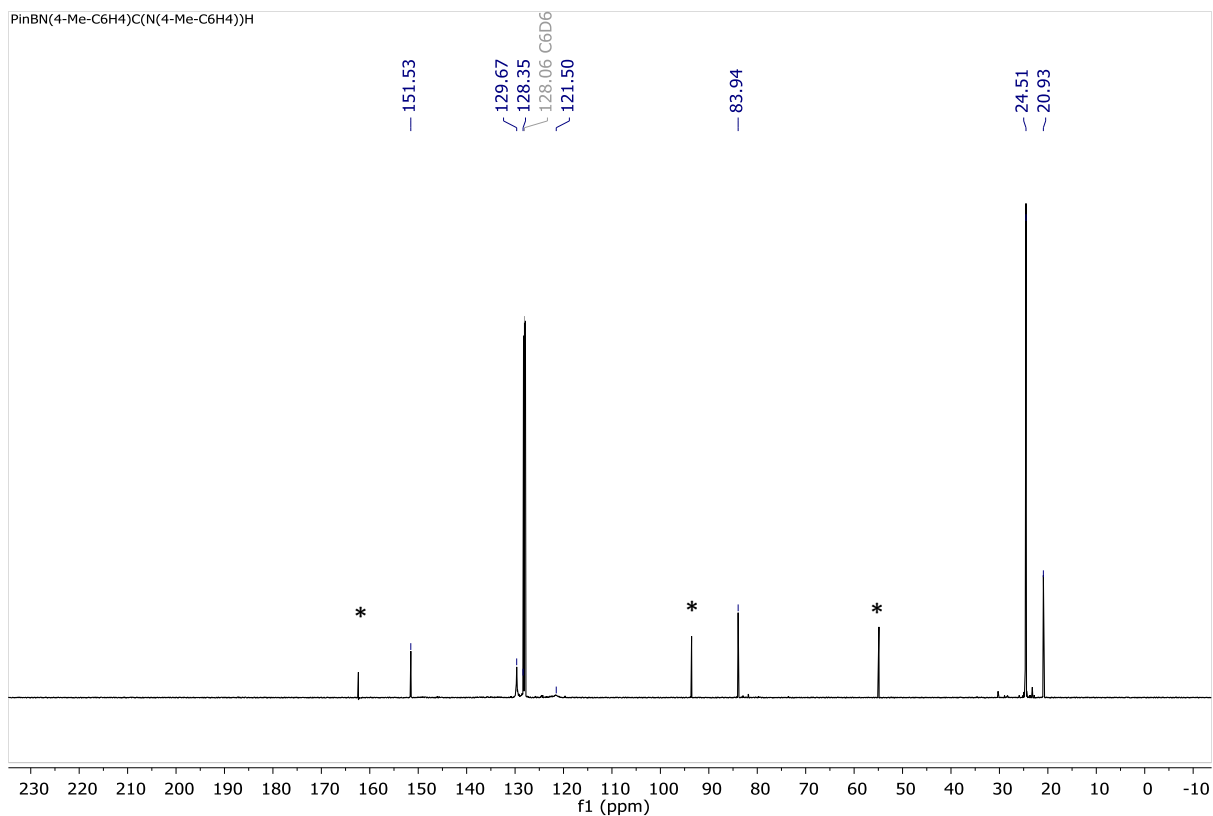

Figure S49: <sup>13</sup>C NMR spectrum for PinBN(4-Me-C<sub>6</sub>H<sub>4</sub>)C(N(4-Me-C<sub>6</sub>H<sub>4</sub>))H, 3b. C<sub>6</sub>H<sub>3</sub>(OMe)<sub>3</sub> internal standard indicated with \*.

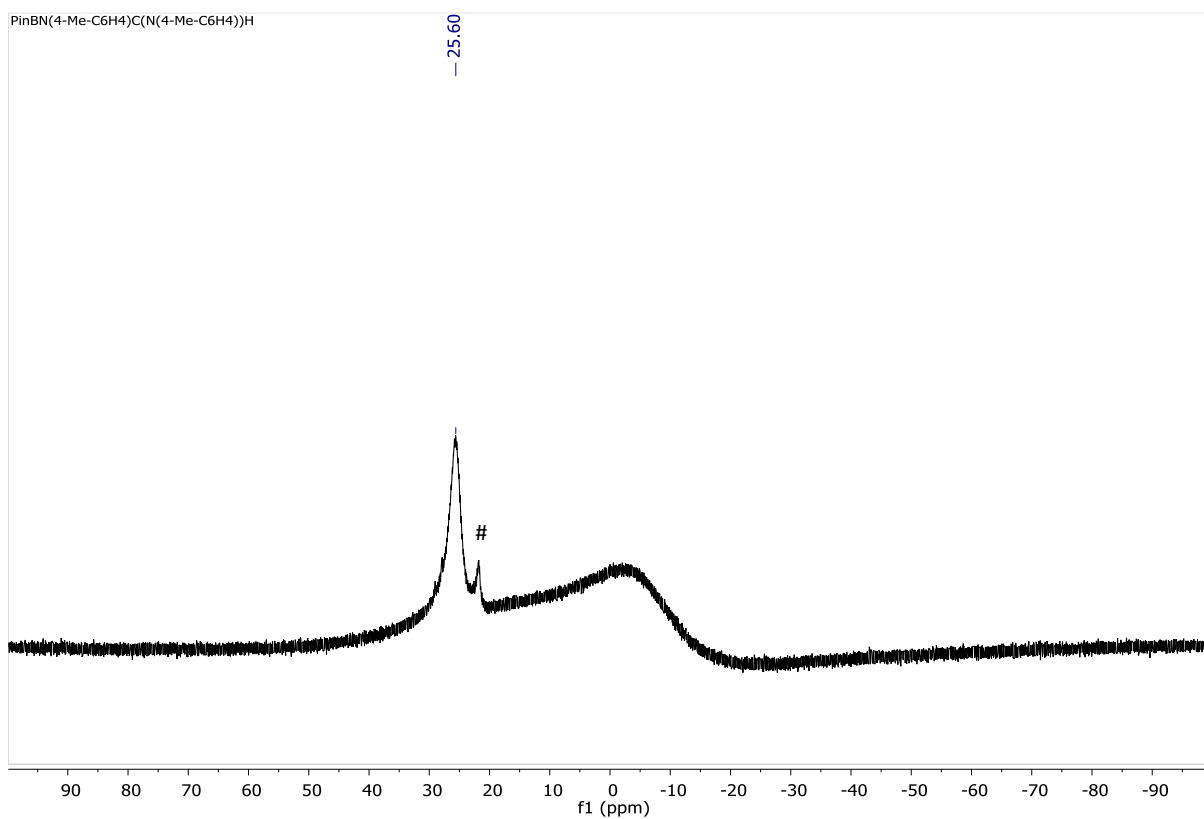

Figure S50: <sup>11</sup>B NMR spectrum for PinBN(4-Me-C<sub>6</sub>H<sub>4</sub>)C(N(4-Me-C<sub>6</sub>H<sub>4</sub>))H, 3b, PinBOTBu indicated with #.

## References

1. Hall, J. W.; Unson, D. M. L.; Brunel, P.; Collins, L. R.; Cybulski, M. K.; Mahon, M. F.; Whittlesey, M. K., *Organometallics*, 2018, **37**, 3102-3110.
2. Jordan, A. J.; Wyss, C. M.; Bacsá, J. and Sadighi, J. P., *Organometallics*, 2016, **35b**, 613–616.
3. Du, Z.; Behera, B.; Kumar, A. and Ding, Y., *J. Organomet. Chem.*, 2021, **950**, 121982.
4. Sahoo, R. K.; Sarkar, N. and Nembenna, S., *Angew. Chemie Int. Ed.*, 2021, **60**, 11991–12000.
5. Xie, Q. and Dong, G., *J. Am. Chem. Soc.*, 2021, **143**, 14422–14427.
6. Ramos, A.; Antiñ, A.; Carrillo-Hermosilla, F.; Fernández-Galá, R. and Garcí A-Vivó, D., *Chem. Commun*, 2019, **55**, 3073.
7. Dolomanov, O.V., Bourhis, L.J., Gildea, R.J, Howard, J.A.K. & Puschmann, H. (2009), *J. Appl. Cryst.* **42**, 339-341.
8. Sheldrick, G.M. (2015). *Acta Cryst.* **A71**, 3-8.
9. Sheldrick, G.M. (2015). *Acta Cryst.* **C71**, 3-8.
10. Gaussian 16, Revision C.01, Frisch, M. J.; Trucks, G. W.; Schlegel, H. B.; Scuseria, G. E.; Robb, M. A.; Cheeseman, J. R.; Scalmani, G.; Barone, V.; Petersson, G. A.; Nakatsuji, H.; Li, X.; Caricato, M.; Marenich, A. V.; Bloino, J.; Janesko, B. G.; Gomperts, R.; Mennucci, B.; Hratchian, H. P.; Ortiz, J. V.; Izmaylov, A. F.; Sonnenberg, J. L.; Williams-Young, D.; Ding, F.; Lipparini, F.; Egidi, F.; Goings, J.; Peng, B.; Petrone, A.; Henderson, T.; Ranasinghe, D.; Zakrzewski, V. G.; Gao, J.; Rega, N.; Zheng, G.; Liang, W.; Hada, M.; Ehara, M.; Toyota, K.; Fukuda, R.; Hasegawa, J.; Ishida, M.; Nakajima, T.; Honda, Y.; Kitao, O.; Nakai, H.; Vreven, T.; Throssell, K.; Montgomery, J. A., Jr.; Peralta, J. E.; Ogliaro, F.; Bearpark, M. J.; Heyd, J. J.; Brothers, E. N.; Kudin, K. N.; Staroverov, V. N.; Keith, T. A.; Kobayashi, R.; Normand, J.; Raghavachari, K.; Rendell, A. P.; Burant, J. C.; Iyengar, S. S.; Tomasi, J.; Cossi, M.; Millam, J. M.; Klene, M.; Adamo, C.; Cammi, R.; Ochterski, J. W.; Martin, R. L.; Morokuma, K.; Farkas, O.; Foresman, J. B.; Fox, D. J. Gaussian, Inc., Wallingford CT, 2016.
11. Andrae, D., Häußermann, U., Dolg, M., Stoll, H., Preuß, H., *Theor. Chim. Acta* **77**, 123–141 (1990).
12. (a) Hariharan, P. C., Pople, J. A. *Theor. Chim. Acta* **28**, 213–222 (1973). (b) Hehre, W. J., Ditchfield, R., Pople, J. A. *J. Chem. Phys.* **56**, 2257 (1972).
13. (a) Becke, A. D. *Phys. Rev. A: At., Mol., Opt. Phys.* **38**, 3098 (1988). (b) Perdew, J. P. *Phys. Rev. B: Condens. Matter Mater. Phys.* **33**, 8822–8824 (1986).
14. Figgen, D., Rauhut, G., Dolg, M., Stoll, H., *J. Chem. Phys.* **311**, 227-244 (2005).
15. Peterson, K. A., Puzzarini, C., *Theor. Chem. Acc.* **114**, 283-296 (2005).
16. Tomasi, J., Mennucci, B., Cammi, R. *Chem. Rev.* **105**, 2999–3094 (2005).
17. Grimme, S., Ehrlich, S., Goerigk, L., *J. Comp. Chem.* **32**, 1456-1465 (2011).
